# 1 Circadian regulation of the transcriptome in a complex polyploid crop

2

3 Hannah Rees<sup>1</sup>, Rachel Rusholme-Pilcher<sup>1</sup>, Paul Bailey<sup>2</sup>, Joshua Colmer<sup>1</sup>, Benjamin White<sup>1</sup>,  
4 Connor Reynolds<sup>1</sup>, Sabrina Jaye Ward<sup>1</sup>, Calum A. Graham<sup>3,4</sup>, Luíza Lane de Barros Dantas<sup>3</sup>,  
5 Antony N. Dodd<sup>3</sup>, Anthony Hall<sup>1</sup>

6

7

8 <sup>1</sup> Earlham Institute, Norwich Research Park, Norwich, NR4 7UZ, UK

9 <sup>2</sup> Royal Botanic Gardens Kew, Richmond, Surrey, TW9 3AE, UK

10 <sup>3</sup> John Innes Centre, Norwich Research Park, Norwich, NR4 7UH, UK

11 <sup>4</sup> School of Biological Sciences, University of Bristol, Bristol, BS8 1TQ, UK.

12

## 13 Abstract

14 The circadian clock is a finely balanced time-keeping mechanism that coordinates  
15 programmes of gene expression. It is currently unknown how the clock regulates expression  
16 of homoeologous genes in polyploids. Here, we generate a high-resolution time-course  
17 dataset to investigate the circadian balance between sets of three homoeologous genes (triads)  
18 from hexaploid bread wheat. We find a large proportion of circadian triads exhibit  
19 imbalanced rhythmic expression patterns, with no specific sub-genome favoured. In wheat,  
20 period lengths of rhythmic transcripts are found to be longer and have a higher level of  
21 variance than in other plant species. Expression of transcripts associated with circadian  
22 controlled biological processes are largely conserved between wheat and *Arabidopsis*,  
23 however striking differences are seen in agriculturally critical processes such as starch  
24 metabolism. Together, this work highlights the ongoing selection for balance versus  
25 diversification in circadian homoeologs, and identifies clock-controlled pathways that might  
26 provide important targets for future wheat breeding.

## 27 Introduction

28 Circadian clock homologs have been both inadvertently selected during crop domestication  
29 and identified as crop improvement targets<sup>1-4</sup>. Understanding circadian regulation of the  
30 transcriptome in crops such as bread wheat (*Triticum aestivum*) may provide useful insights  
31 for future crop improvement. Wheat also provides an excellent model system to explore how  
32 the circadian clock and its outputs are co-ordinated in a recently formed, complex

33 allopolyploid. In *Arabidopsis*, circadian transcription factors act in a dose-dependent manner,  
34 with both knock-out and over-expression mutants resulting in altered function of the  
35 circadian oscillator<sup>5-8</sup>. It is not yet understood how rhythmic gene expression is balanced in  
36 species with multiple copies of the same gene. *T. aestivum* is a hexaploid (AABBDD) formed  
37 through interspecific hybridisation of three diploid ancestors around 10,000 years ago<sup>9,10</sup>.  
38 51.7% of high-confidence wheat genes still exist in triads; sets of three homoeologous genes  
39 present on each of the A, B and D genomes<sup>11</sup>. As these homoeologs evolved independently  
40 for several million years prior to hybridization, it is plausible that these independent species  
41 might have been subject to different selective pressures on their clocks (Fig. 1a).  
42 The circadian network in *Arabidopsis* comprises a series of interlocking negative  
43 transcriptional feedback loops connected by key activators<sup>12</sup>. Although monocots such as  
44 wheat diverged from their dicot relatives over 140 million years ago<sup>13</sup>, many circadian  
45 oscillator components seem to have been conserved, particularly those forming the core loop  
46 network. Orthologs of *TIMING OF CAB EXPRESSION 1 (TOC1)* and other *PSEUDO-*  
47 *RESPONSE REGULATOR (PRR)* genes have been identified in wheat, rice and barley, and  
48 several loci within these genes have been associated with altered flowering times, most  
49 notably (*ppd-1*) within *TaPRR3/7*<sup>14-16</sup>. Likewise, mutants of orthologs of *LATE*  
50 *ELONGATED HYPOCOTYL (LHY)*, *GIGANTEA (GI)*, *EARLY FLOWERING 3 (ELF3)*, and  
51 *LUX ARRHYTHMO (LUX)* have been identified that alter heading dates, pathogen  
52 susceptibility, plant height or lower grain yields<sup>17-21</sup>.  
53 Circadian control of carbon fixation and starch metabolism are thought to form part of the  
54 selective advantage conferred by the clock<sup>22,23</sup>. This is apparent in the *lhy/cca1* short period  
55 double mutant, where night-time starch levels reach exhaustion earlier compared to wild-  
56 type, triggering early onset starvation responses that reduce plant productivity<sup>23</sup>. Similarly,  
57 genes encoding photosynthesis-related proteins are well-established targets of the circadian  
58 clock and include the *LIGHT HARVESTING CHLOROPHYLL A/B BINDING PROTEIN*  
59 genes (*LHCB* also known as *CAB* genes) and photosystem I and II reaction centre genes<sup>24,25</sup>.  
60 Here, we investigate circadian balance within wheat triads to understand how circadian  
61 control is co-ordinated in a polyploid crop with three subgenomes. Second, we examine  
62 similarities and differences between the circadian transcriptome in wheat and its distant dicot  
63 relative *Arabidopsis*, at a global level and at the level of genes encoding key pathways such  
64 as primary metabolism and photosynthesis.

## 65 Results

### 66 Global analysis of the circadian transcriptome in wheat

67 We generated a circadian RNA-seq time-course and compared it with a recently published  
68 dataset from *Arabidopsis*<sup>26</sup> over 24h - 68h following transfer to constant light. Rhythmicity  
69 was assessed using Metacycle Benjamini-Hochberg (BH)  $q$ -values. Of the 86,567 genes  
70 expressed in wheat, 33.0% were rhythmically expressed with a BH  $q < 0.05$  and 21.5% with  
71 a BH  $q < 0.01$  (Supplementary Note 1, Supplementary Table 1). This was significantly lower  
72 than the proportions of rhythmically expressed genes in the *Arabidopsis* dataset (50.7% BH  $q$   
73  $< 0.05$ , 39.1% BH  $q < 0.01$ ) using the same criteria ( $X^2(1) = 2727.1$ ,  $p < 0.001$ , one-tailed,  
74 two-proportions  $z$ -test). Circadian waveform characteristics of the rhythmically expressed  
75 genes (BH  $q < 0.01$ ) in the wheat and *Arabidopsis* datasets were quantified using algorithms  
76 in Metacycle (JTK, ARSER, LS and meta2d) and Biodare2 (FFT-NLLS and MESA). Period,  
77 phase, and amplitude estimates from FFT-NLLS and meta2d were well-correlated for  
78 individual genes (Supplementary Fig. 1). All models reported that mean period length in  
79 wheat was approximately 3h longer than in *Arabidopsis* (wheat = 25.9 - 27.5h,  
80 *Arabidopsis* = 22.6 - 24.4h;  $t(36067) = 101.58$ ,  $p < 0.001$ , Welch's two sample  $t$ -test;  
81 Supplementary Fig. 2). There was no significant difference between mean periods across the  
82 three wheat sub-genomes (Fig. 1c,  $F(2, 28,276) = 0.179$ ,  $p = 0.836$ , One-way ANOVA).  
83 We used meta2d to compare period means and distributions from four previously published  
84 circadian datasets, and found that period lengths in wheat were longer and had higher  
85 standard deviation than period distributions from *Arabidopsis*, *Brassica rapa*, *Brachypodium*  
86 *distachyon* and *Glycine max* (Fig 1b; Supplementary Table 2).  
87 We investigated how wheat periods changed over the course of the three-day experiment and  
88 found that periods were longer immediately after transfer to constant light (28.61h,  
89  $SD = 3.421h$ ), and progressively shortened over the following days (Supplementary Note 2).  
90 One explanation for this initial lengthening of period is that the dusk zeitgeber is an important  
91 signaling cue for wheat circadian expression. It is possible that the mean period of expressed  
92 transcripts initially lengthens trying to follow this missing dark signal before the free-running  
93 endogenous period asserts itself.  
94 For both *Arabidopsis* and wheat, we recalculated phases of rhythmic transcripts relative to  
95 endogenous period (circadian time; CT). Across all algorithms, most transcripts in  
96 *Arabidopsis* peaked during the subjective night (around CT12-24; Supplementary Fig. 3). In

97 wheat, the greatest numbers of rhythmic genes peaked during the subjective day (around  
98 CT6-8) with a second, smaller group being expressed in the night (~CT20). When we  
99 grouped transcripts into 2h period bins, we found that transcripts with short periods contained  
100 proportionally more dawn-peaking transcripts, whereas those with longer periods contained  
101 proportionally more dusk-peaking transcripts (Supplementary Note 3, Supplementary Fig. 4).

## 102 Balance of circadian regulation within triads

103 Although previous studies have examined the relationships between circadian regulated  
104 orthologs in different plant species<sup>26-28</sup> and within paralogs in *Brassica rapa*<sup>29</sup>, hexaploid  
105 wheat provides an opportunity to study the relationships between recently formed circadian  
106 regulated homoeologs acting within the same organism. In wheat, over 72% of syntenic triads  
107 are estimated to have “balanced” expression, with similar relative abundance of transcripts  
108 from each of the three homoeologs<sup>30</sup>. Due to the importance of the clock in coordinating  
109 dosage of gene expression, our hypothesis was that many circadian triads would also have  
110 balanced circadian regulation. We defined imbalanced circadian regulation as triads  
111 harbouring differences in rhythmicity (i.e., BH  $q$ -values), period lengths, phases, and relative  
112 amplitudes.

113 Of the 16,359 expressed triads in our dataset, 9901 (60.52%) had at least one rhythmic  
114 homoeolog, and 3448 (21.08%) had three rhythmically expressed genes (BH  $q < 0.05$ ), with  
115 the latter hereafter termed “rhythmic triads” (purple segment, Fig. 1d). 6453 triads lacked  
116 rhythmicity in either one or two expressed homoeolog(s) (green and blue segments, Fig. 1d).  
117 In both cases, there was no bias for absence of rhythmicity in the A, B or D copy ( $\chi^2(2)=$   
118  $6.8415$ ,  $p = 0.40$  where one gene is arrhythmic,  $\chi^2(2)= 6.8415$ ,  $p = 0.03$  where two genes are  
119 arrhythmic). We found cases where high-confidence rhythmic homoeologs (BH  $q < 0.01$ )  
120 occurred alongside arrhythmic homoeologs (BH  $q > 0.05$ ) represented by light-shaded outer-  
121 ring segments in Fig. 1d. In total there were 3450 of these imbalanced-rhythmicity triads  
122 (Fig. 1h,i). To explore other forms of circadian imbalance, we assessed whether phase, period  
123 and relative amplitude were conserved between homoeologs within the rhythmic triad set  
124 (purple segment, Fig. 1d). Differences in phases were quantified by a cross-correlation  
125 analysis to assess whether the correlation between homoeologs was improved with a time lag  
126 of 4, 8 or 12 hours. We identified 464 triads with imbalanced phases with an optimum lag of  
127  $>0$ h between homoeologs (Fig. 1e,j). 1,139 triads had imbalanced periods with more than 2h  
128 difference in period between homoeologs (Fig. 1f,k). 701 triads had imbalanced relative  
129 amplitudes with more than two-fold difference in relative amplitude (Fig. 1g,l). Within this

130 last group, the homoeolog with the lowest amplitude was still rhythmic, as observed when  
131 data are mean-normalized (Fig. 11,m). In summary, the largest cause of imbalanced circadian  
132 expression within triads was absence of rhythmicity (67.89%) with differences in period  
133 (22.41%), relative amplitude (13.79%) and phase (9.13%) occurring more infrequently and  
134 with some overlap between categories.

135 Out of all expressed triads in our dataset, around 11.1% had balanced circadian expression,  
136 31.1% had imbalanced circadian expression, 39.5% were arrhythmic and 18.4% were  
137 borderline triads which did not fit into the categories imposed by our cut-offs. There is  
138 therefore a ratio of approximately 3:1 imbalanced to balanced circadian triads in wheat. This  
139 finding was initially surprising given that Ramírez-González et al. reported 72.5% of wheat  
140 triads showed balanced expression. We found that 64.15% of the triads classified as circadian  
141 imbalanced in our data would be classified as balanced in the Ramírez-González study  
142 (Supplementary Fig. 5). However, if we consider that triads with highly imbalanced circadian  
143 regulation can be classified as balanced in their expression at a single timepoint (as  
144 demonstrated in Supplementary Fig. 6), and that there are multiple ways in which homeologs  
145 can become circadian imbalanced (phase, period, rhythmicity etc.), then it is quite reasonable  
146 that only a small proportion of triads are classified as having balanced circadian regulation in  
147 this study. This insight highlights the importance of considering temporal dynamics when  
148 studying gene expression.

149 One explanation for imbalanced rhythmicity is that arrhythmic homoeologs are silenced. In  
150 support of this, we found that the rhythmic homoeologs in imbalanced triads were expressed  
151 at a significantly higher baseline level than their arrhythmic homoeologs (Fig. 1n;  $F(16,$   
152  $35,148) = 6.94, p < 0.001$ , Two-level, nested ANOVA on Log10 transformed data). We also  
153 found that triads with balanced rhythmicity were expressed at a uniformly higher level than  
154 the most highly expressed homoeolog(s) in the imbalanced triads (Fig. 1n;  $F(7, 35,148) =$   
155  $570.909, p < 0.001$ ). Therefore, in imbalanced rhythmicity triads, the rhythmic homoeolog  
156 does not appear to compensate for reduced expression of the other homoeolog(s), so the  
157 overall expression across the triad is reduced. This is supported by data from diploid *Brassica*  
158 *rapa*, where circadian regulated paralogs are expressed at a higher level than single copy  
159 genes<sup>29</sup>.

160 To investigate whether certain biological processes were associated with circadian balance,  
161 we compared GO-slim terms enriched in the 1816 circadian balanced triads, the 5082  
162 differently circadian regulated triads and the 6458 arrhythmic triads, identifying significant  
163 terms unique to each group (Table 2). Some terms were enriched only in circadian balanced

164 triads ( $p$ -value  $<0.0001$ , Fisher's exact test e.g., “photosynthesis”, “generation of precursor  
165 metabolites and energy”, “gene-expression” and “translation”). In contrast, GO-slim terms:  
166 “developmental process involved in reproduction”, “and “system development” were  
167 enriched significantly in triads with differently regulated homoeologs ( $p$ -value  $<0.0001$ ) but  
168 not in triads with circadian balanced homoeologs ( $p$ -value  $>0.5$ ). A possible explanation for  
169 this enrichment could be that imbalanced circadian triads are more likely to be dynamically  
170 expressed over developmental stages or show local dominance of a sub-genome in a  
171 particular tissue type. Transcription factor (TF) triads were as likely to be circadian  
172 balanced/imbalanced as non-transcription factors ( $\chi^2$  (2, N = 13,356) = 3.03,  $p$  = 0.08, chi-  
173 square test). Previously validated wheat TFs with imbalanced circadian expression included  
174 *WCBF2* (aka *TaCBF1*) and *TaPCF5*, both of which regulate abiotic stress responses<sup>31,32</sup>  
175 (Supplementary Note 4, Supplementary Fig. 7).

176 When we compared GO-slim terms associated with paralogs in *Brassica rapa*<sup>29</sup>, we found  
177 that *Brassica* paralogs with similar circadian expression patterns (as characterized in  
178 Greenham et al, (2020) using DiPALM<sup>29</sup>) were also associated with “photosynthesis” and  
179 “generation of precursor metabolites and energy” ( $p$ -value  $<0.001$ , Fisher's exact test). These  
180 terms were not enriched in circadian paralogs with differential expression patterns ( $p$ -value  
181  $>0.5$ ; Supplementary Table 3). Examples of genes having similar (balanced) circadian  
182 expression within *Brassica rapa* paralogs and in all three homoeologs in wheat triads  
183 included orthologs of the PSI light harvesting complex genes *LHCA1*, *LHCA2* and *LHCA3*,  
184 and the RNA polymerase sigma factor *SIG5*. It is possible that conservation of circadian  
185 expression of these duplicate genes poses an evolutionary benefit, as similar regulation has  
186 been retained for both duplicate copies in ancient paralogs of *Brassica rapa* and within more  
187 recently formed wheat homoeologs arising through polyploidization.

188

### 189 Patterns of triad circadian balance across the genome

190 Next, we wanted to determine whether there are genomic regions that incorporate a clustering  
191 of circadian balance in rhythmicity. We hypothesized that if we found sequential “runs” of  
192 triads with arrhythmic expression on a particular chromosome, this might indicate an  
193 overlying region of differential chromatin accessibility or transcriptional suppression. To  
194 investigate this, we looked for regions on each set of chromosomes where there were  
195 sequential triads having the same number of rhythmic homeologs (i.e. runs of three, two or  
196 one rhythmic genes). We also looked for runs of sequential rhythmic triads specific to a  
197 particular chromosome (e.g. runs of two rhythmic genes on chromosomes A and B). In both



198 cases, we found no evidence that triads with specific categories of rhythmic homoeologs  
199 were grouped together more often than would be expected by chance (Supplementary Note 5,  
200 Supplementary Table 4). This suggests that distributions of rhythmic balance appear to be  
201 randomly distributed across the genome (Supplementary Fig. 8).

202

### 203 Clustering of gene expression and GO-term enrichment

204 To establish whether similar phased transcripts in wheat and *Arabidopsis* had similar  
205 biological roles, we clustered rhythmic transcripts (BH  $q < 0.01$ ) into 9 expression modules  
206 for each species and identified GO-slim terms enriched in each module ( $p < 0.01$ ). Circadian  
207 characteristics of module eigengenes are shown in Supplementary Table 6. We compared the  
208 correlation and cross-correlation of pairwise modules in the two species to find modules that  
209 correlated with a peak lag of 0 (synchronous phase) or with a peak lag of 4, 8, or 12h  
210 (asynchronous phase). Overall, modules with synchronous phases in wheat and *Arabidopsis*  
211 shared more GO-slim terms than modules with asynchronous phases ( $F(3,77) = 4.79$ ,  $p$   
212  $< 0.01$ , One-Way ANOVA), indicating that these modules in wheat and *Arabidopsis* contain  
213 genes with similar functions (Supplementary Fig. 9). We focused on four of these  
214 synchronous module pairs, broadly peaking at dawn, midday, dusk, and night for further  
215 analysis (Fig. 2). Eigengenes for dawn peaking modules A9 and W9 were highly correlated  
216 ( $r > 0.9$ ) and shared 14 overlapping enriched GO-slim terms ( $p < 0.01$ ; Fig. 2a,b,f). These  
217 included terms for translation and gene expression as well as terms related to protein, amide,  
218 nitrogen and organonitrogen biosynthetic and metabolic processes (full lists in  
219 Supplementary Table 7). Co-expressed genes in the dawn-expressed modules included  
220 several orthologs involved in light, heat, and biological defence, as well as 45 ribosomal  
221 protein orthologs (Supplementary Note 6). Transcripts for ribosomal proteins in mouse liver  
222 and *Neurospora crassa* have also been reported to oscillate, suggesting a conserved role for  
223 the circadian clock in co-ordinating ribosome biogenesis<sup>33,34</sup>.

224 In addition to enriched GO-slim terms, we investigated enrichment for transcription factor  
225 (TF) superfamilies and transcription factor binding sites in each wheat module of clock-  
226 regulated genes. In late-night/dawn modules W8 and W9, transcripts encoding MYB  
227 transcription factors were significantly enriched and included putative TFs involved in leaf  
228 morphogenesis, plant growth, regulation of flavonoid biosynthesis, and developmental  
229 transition to flowering (Supplementary Note 6, Supplementary Fig. 10).

230 Eigengenes for wheat and *Arabidopsis* modules peaking in the day (W3 and A2) had a  
231 relatively low correlation ( $r=0.491$ ), but peaked with similar CT values (CT 6.34h and  
232 6.19h) given the longer circadian period in wheat. 5 out of 15 of the GO-slim terms enriched  
233 in the W3 module were also found in the A2 module ( $p < 0.01$ ; yellow triangles in Fig.  
234 2a,c,f). These included terms relating to “photosynthesis”, “response to radiation” and  
235 “generation of precursor metabolites and energy”. Co-expressed genes peaking in day-time  
236 modules included light-harvesting and light signaling genes as well as *CYP709B3*, which  
237 protects the plant from transpiration-triggered salinity stress during the day<sup>35,36</sup>.  
238 In dusk-peaking modules A5 and W4, 8 significantly enriched GO-slim terms were shared  
239 between *Arabidopsis* and wheat ( $p < 0.01$ , green triangles in Fig. 2a,d,f). Several genes co-  
240 expressed in these dusk modules were involved in auxin transport and signalling including  
241 the endosomal sorting complex protein *CHMPIA* which ensures proper sorting of auxin  
242 carriers (Supplementary Note 6)<sup>37</sup>. There was also a significant enrichment for expression of  
243 transcripts encoding AP2-EREBP (ethylene responsive) and ARF (auxin responsive)  
244 transcription factor superfamilies within the W4 module (Supplementary Fig. 10).  
245 Interestingly, this was followed two hours later by the expression of genes with AP2-EREBP  
246 transcription factor binding sites in their promoter region (W5, Supplementary Fig 11).  
247 Finally, two evening-phased modules W5 and A6 ( $r=0.80$ ) were enriched for GO-slim terms  
248 concerning several metabolic processes (blue triangles in Fig. 2f). Co-expressed orthologs in  
249 these two modules included *SEVEN IN ABSENTIA2* that regulates ABA-mediated stomatal  
250 closure and drought tolerance in *Arabidopsis*<sup>38</sup>, and *HYDROPEROXIDE LYASE1* that  
251 contributes to responses to insect attack and mechanical wounding<sup>39</sup>.

## 252 Components of the core circadian clock in *Arabidopsis* and wheat

253 We next compared the dynamics of circadian oscillator components in wheat and  
254 *Arabidopsis*. Clock gene orthologs belonging to large gene families were detected by  
255 phylogenetic analysis (Supplementary Fig. 12–16; Supplementary Table 8). Overall, wheat  
256 circadian clock genes were expressed rhythmically and with a similar phase to their  
257 *Arabidopsis* counterparts (Fig. 3). However, the free-running rhythms of clock transcripts in  
258 wheat had a mean circadian period that was approximately 3.49h longer than in *Arabidopsis*  
259 (27.23h and 23.74h, respectively).  
260 *TaLHY* and *TaTOCI* peaked sharply at dawn and dusk, respectively, during the first cycle in  
261 constant light, and maintained an >8h difference in phase throughout the experiment (Fig.  
262 3a,b). This is consistent with their phasing in *Arabidopsis*. All three homoeologs for *TaGI*



263 were robustly rhythmic (BH  $q < 0.01$ ) and peaked at CT7 (Fig. 3c). *TaPRR73* transcripts  
264 peaked approximately 5h before *TaPRR37* transcripts, consistent with the phase divergence  
265 of *Arabidopsis PRR7* and *PRR3* (Fig. 3d,e). However, wheat homoeologs *TaPRR59* and  
266 *TaPRR95* had similar expression profiles ( $R^2=0.68$ ) peaking marginally apart at CT8 and  
267 CT10, in between the peak phases of *Arabidopsis PRR9* (CT5) and *PRR5* (CT11) (Fig. 3f,g).  
268 Therefore, the *PRR* gene family in wheat peaks in the order of; *TaPRR73*, [*TaPRR37*,  
269 *TaPRR95*, *TaPRR59*] in quick succession, and finally *TaTOC1*. This sequential pattern  
270 matches the expression of *PRR* homologs in rice<sup>40</sup>.

271 Transcripts encoding evening complex components, *LUX*, *ELF3* and *ELF4*, are circadian  
272 regulated in *Arabidopsis* and peak simultaneously at dusk. Three wheat triads for *LUX*-like  
273 genes were identified; one with higher identity to *LUX/BOA* and two similar to other *LUX*-  
274 like *Arabidopsis* genes (Supplementary Fig. 15). Transcripts from all three of these triads  
275 accumulated rhythmically and peaked from midday to dusk, *TaLUX-Lb* at CT7, *TaLUX/BOA*  
276 at CT10 and *TaLUX-La* at CT12 (Fig. 3h,i; Supplementary Fig. 17). Five wheat transcripts  
277 with homology to *Arabidopsis ELF4* and *ELF4-L1-4* accumulated with a mean circadian  
278 phase of 12.6h; similar to *ELF4*, but with lower relative amplitudes (Fig. 3j,k; Supplementary  
279 Fig. 17). *TaELF3* transcripts were all arrhythmic (BH  $q > 0.36$ ), and the *TaELF3-ID*  
280 homoeolog was expressed with a particularly low baseline level of 0.73 TPM in comparison  
281 to the other two homoeologs (8.7-9.7 TPM) (Fig. 3l). This is consistent with previous  
282 findings linking a deletion in *TaELF3* to the *eps* QTL on chromosome 1D in Cadenza<sup>18</sup>.

283 We next assessed the balance of circadian expression between triad homoeologs in the core  
284 clock network. *TaLHY*, *TaGI*, and *TaPRR59* had notably similar expression patterns in terms  
285 of phase, period, relative amplitudes, and baseline expression over all timepoints (Fig.  
286 3a,c,f,g), suggesting that unbalance in these triads is strongly selected against. Homoeologs  
287 of *TaTOC1*, *TaPRR73* and *TaPRR37(Ppd)* had similar phases, but all had reduced expression  
288 in the A-genome homoeolog (Fig. 3b,d,e). *TaLUX/BOA-3A*, *TaLUX-La-3B* and *TaLUX-Lb-*  
289 *ID* had marginally shorter periods (>2h) and delayed phases (>2h) compared to their  
290 respective homoeologs (Supplementary Table 9).

291 The REVEILLE family are CCA1/LHY-like MYB-domain transcription factors that are  
292 predominantly activators of evening expressed genes<sup>41,42</sup>. The wheat *RVE* genes could be  
293 split into a *LHY* clade (containing the *TaLHY* triad described above), a *RVE6/8*-like clade  
294 containing three wheat triads and a *RVE1/2/7*-like clade also containing three triads  
295 (Supplementary Fig. 12). All *TaRVE6/8* transcripts peaked at CT0-4 concurrently with  
296 *TaLHY* (Supplementary Fig. 17). The *TaRVE2/7* transcripts peaked with distinct phases;

297 *TaRVE27b* in phase with *TaLHY*, *TaRVE27c* 4h before *TaLHY* and *TaRVE27a*  
298 approximately 12h before *TaLHY* (Supplementary Fig. 17). Based on their phylogenetic  
299 relationships, it is probable that several *RVE2/7* clade paralogs in wheat and *Arabidopsis*  
300 arose independently after their evolutionary divergence, and it is therefore interesting that  
301 they both show distinct phases of expression, suggesting homoplastic circadian functions.  
302 Expression of orthologs for additional transcripts involved in circadian regulation (*FKFI*,  
303 *ZTL*, *LKP2*, *LNK1/2*, *CHE* and *LWD*) are reviewed in Supplementary Note 7 and  
304 Supplementary Fig. 17.

305 Circadian control of photosystem and light signalling gene expression is largely conserved  
306 between *Arabidopsis* and wheat

307 A further GO-slim analysis across all rhythmically-expressed genes in *Arabidopsis* and wheat  
308 identified enrichment of similar GO-slim processes including “photosynthesis” ( $p < 1 \times 10^{-14}$ ),  
309 “rhythmic process” ( $p < 1 \times 10^{-6}$ ), “response to abiotic stimulus” ( $p < 1 \times 10^{-13}$ ) and “cellular  
310 macromolecule biosynthetic process” ( $p < 1 \times 10^{-5}$ , Fisher’s exact test, Supplementary Table  
311 10). We used genes associated with some of these GO-slim terms as case-studies to highlight  
312 similarities and differences in circadian control between the two species. Expression data and  
313 Metacycle statistics for all transcripts in this analysis are in Supplementary Table 11.

314 In considering photosynthesis, we examined specifically nuclear genome-encoded  
315 photosystem (PS) proteins. Transcripts encoding the PSI components *LHCA1-6*, the PSI  
316 reaction centre subunits *PSAD* and *PSAE* and the *PSII* subunits *LHCB1-7* were rhythmically  
317 expressed in both species and had conserved phases (Supplementary Fig. 18). *LHCA1-4*  
318 peaked towards the end of the subjective day and *LHCA5* and *6* peaked during the subjective  
319 night. *PSAD* and *PSAE* peaked concurrently with *LHCA1-4*. In both species, *LHCB7*  
320 transcripts had lower relative amplitudes compared to other LHCB transcripts. *PSB27* is a  
321 protein associated transiently with the *PSII* complex involved in adaption to fluctuating light  
322 intensities<sup>43</sup>. Transcripts for this protein peaked during the subjective day in *Arabidopsis* and  
323 during the subjective night in wheat.

324 In considering the GO-slim term “response to abiotic stimulus”, we next investigated  
325 expression of transcripts for photoreceptors and light signalling proteins due to their  
326 pervasive influence upon development, metabolism, and circadian timing. Although  
327 transcripts for the UV-B photoreceptor *UVR8* accumulated with a circadian rhythm in both  
328 species, only one PHYTOCHROME ortholog (*PHYA*) and three *CRYPTOCHROME*

329 orthologs (*CRY1*) were rhythmic in wheat out of 18 orthologs identified (Supplementary Fig.  
330 18). This contrasts with *Arabidopsis*, where *PHYA-C*, *CRY1* and *CRY2* accumulated with a  
331 circadian rhythm.

332 Downstream light signalling proteins COP1 and SPA form complexes that degrade positive  
333 regulators of photomorphogenesis (e.g. *HFR1* and *HY5*) under dark conditions<sup>44</sup>. Transcripts  
334 for *COP1*, *SPA4*, *HFR1* and *HY5* accumulated rhythmically and with conserved phases in  
335 both species (Supplementary Fig. 19). *COP1/SPA4* peaked synchronously around the end of  
336 the subjective night. Surprisingly, given the similar role *HFR1* and *HY5* proteins have in  
337 preventing hypocotyl elongation in low light, *HFR1* and *HY5* transcripts were expressed anti-  
338 phase to each other. *HY5* and *HFR1* act synergistically to coordinate the photomorphogenesis  
339 response, although it has been suggested that their activation is regulated through  
340 independent pathways<sup>45</sup>.

341 Wheat triads with identity to *Arabidopsis PIN1*, *PIN4*, *PIN5*, and *PIF4/5* were rhythmically  
342 expressed, alongside two triads with high similarity to rice *OsPIL11* and *OsPIL13* (<sup>46</sup>;  
343 Supplementary Fig. 19). Overall, we observe that the arrhythmic accumulation of most of the  
344 wheat PHY and CRY transcripts is not reflected in the rhythmic expression of several  
345 downstream light signalling transcripts. This supports the notion that regulatory signals from  
346 photoreceptors might occur at the level of protein stability and localisation rather than at the  
347 level of transcript accumulation, as occurs for *ZTL* or *HY5* in *Arabidopsis*.

348 A set of proteins that link light signalling, circadian regulation and chloroplasts are the sigma  
349 factors<sup>47</sup>. These light-responsive nuclear-encoded regulators of chloroplast transcription  
350 guide promoter recognition and transcription initiation by plastid encoded RNA-polymerase  
351 (PEP) on the chloroplast genome<sup>48-51</sup>. In *Arabidopsis*, *SIG1*, 3, 4, 5 and 6 were rhythmically  
352 transcribed (Supplementary Fig. 19). In wheat, all homoeologs in triads orthologous to *SIG1*,  
353 *SIG3* and *SIG5* were also rhythmic (BH  $q < 0.01$ ). Whilst the dawn phase of *TaSIG5*  
354 transcripts were similar to *AtSIG5*, *TaSIG1* transcripts were expressed over 10h earlier than  
355 *AtSIG1* (Supplementary Fig. 19). Previous research has shown that activity of *AtSIG1* can be  
356 regulated through redox-dependent phosphorylation<sup>52</sup>, and activity of all sigma factors are  
357 likely to be subject to multiple layers of regulation in addition to circadian control of  
358 transcript expression.

359

360 Similarities and differences in circadian control of primary metabolism genes in *Arabidopsis*  
361 and wheat

362 Expression profiles of genes with key roles in primary metabolism were compared in  
363 *Arabidopsis* and wheat with a focus on enzymes that regulate trehalose 6 phosphate (Tre6P)  
364 and starch metabolism (Fig. 4). Tre6P synthase (TPS) and Tre6P phosphatase (TPP)  
365 participate in the synthesis and dephosphorylation of Tre6P, respectively. Tre6P is an  
366 important signalling metabolite associated with both sucrose regulation and circadian  
367 regulation in *Arabidopsis*<sup>53-55</sup>. Tre6P also affects grain yield and drought resilience in wheat,  
368 maize, and rice<sup>56</sup>. Transcripts for *TPS1*, 2, 6, 8, 9, 10 and 11 and *TPPA*, E, F, G and H were  
369 expressed rhythmically in *Arabidopsis* (Supplementary Fig. 20). Wheat transcripts for *TPS1*  
370 (the most well-characterised of the T6P synthases) were arrhythmic, however rhythmic  
371 transcripts were found in triads more closely related to *TPS11*, 6 and 7 (Supplementary Fig.  
372 20). We identified three rhythmic TPP triads in wheat, two of which were orthologous to  
373 *Arabidopsis* *TPPA*, F and G. The third TPP triad was part of a monocot-specific clade  
374 identified by Paul et al. (2018), which also included *Zm00001d032298*, a crop improvement  
375 target in maize<sup>56</sup>.

376 Ribulose biphosphate carboxylase (Rubisco) comprises eight small (RbcS) and 8 large  
377 (RbcL) subunits, which are encoded by the nuclear and chloroplast genomes, respectively<sup>57</sup>.  
378 Rubisco requires activation by Rubisco activase (RCA) to release its activity from inhibitory  
379 substrates<sup>58</sup>. In our wheat expression data, 22 putative wheat orthologs for the small subunit  
380 of Rubisco were rhythmic, peaking during the subjective night, as *RBCS1A*, *RBCS1B*,  
381 *RBCS2B* and *RBCS3B* do in *Arabidopsis* (Supplementary Fig. 20). Two triads with identity to  
382 Rubisco activase were identified, one of which accumulated rhythmically (peaking at CT0, as  
383 with *Arabidopsis* *RCA*).

384 Circadian regulation has a pervasive influence on starch metabolism in *Arabidopsis*,  
385 particularly the nocturnal rate of transitory starch degradation<sup>23,59</sup>. Chloroplast phospho-  
386 glucose isomerase 1 (*PGII*) and chloroplast phosphoglucose mutase (*PGMI*) are essential  
387 enzymes that link the Calvin-Benson cycle with starch biosynthetic pathway<sup>60-62</sup>. In  
388 *Arabidopsis*, these transcripts accumulated with a circadian rhythm (BH  $q < 1 \times 10^{-4}$ ); *PGMI*  
389 peaked just after dusk (CT14), and *PGII* slightly later at CT20. In contrast, only one wheat  
390 *TaPGII* homoeolog was rhythmic (BH  $q < 0.01$ ), which had a low relative amplitude (0.16)  
391 and a peak phase of CT8. No homoeologs for *TaPGMI* were rhythmically expressed (BH  $q >$   
392 0.01, Supplementary Fig. 20).

393 ADP-glucose pyrophosphorylase (AGPase) mediates the first irreversible and rate-limiting  
394 step in starch biosynthesis through the formation of ADP-Glc. In *Arabidopsis*, transcripts  
395 encoding the small and large subunits of AGPase (*APL1*, *APL2*, *APL3*, *APSI*) were rhythmic,  
396 peaking at night around CT20. In comparison, in wheat only two of the eleven transcripts  
397 with homology to *APL1*, *APL2* and *APSI* were rhythmic (BH  $q < 0.01$ ), with the remaining  
398 transcripts lacking a discernible rhythm (BH  $q > 0.05$ ) (Supplementary Fig. 20).

399 Starch synthases (SS) represent another group of metabolically important enzymes that use  
400 the glucose from ADP-Glc to elongate glucan chains. In *Arabidopsis*, there are five types:  
401 SSI, SSII, SSIII, SSIV and granule bound GBSSI. SSI-IV are responsible for synthesis of  
402 amylopectin, with SSIII and IV determining starch granule number and morphology<sup>63</sup>. *GBSSI*  
403 is a known dawn-expressed gene, regulated directly by CCA1/LHY, specialised for amylose  
404 synthesis<sup>64</sup>. In wheat, *GBSSI* orthologs are called *TaWaxy* and cultivars with three null alleles  
405 produce amylose-free starch in their grain<sup>65</sup>. Comparison of starch synthase expression in  
406 *Arabidopsis* and wheat revealed several differences between the phases and relative  
407 amplitudes of these transcripts (Supplementary Fig. 20). In *Arabidopsis*, *GBSSI* transcripts  
408 had by far the greatest relative amplitude (1.26) with peak expression at dawn. The next  
409 greatest amplitudes were of *SSIV* transcripts, which peaked at CT17. *SSII* and *SSIII* peaked  
410 together at CT21 and *SSI* peaked at CT8 with a much smaller amplitude (0.12). In contrast,  
411 in wheat, an *SSIII* triad (*TaSSIIIb*) had the largest relative amplitude rhythms of the wheat  
412 starch synthases identified (0.64 - 0.73). Wheat transcripts for *SSI* and *SSIV* also peaked in  
413 the morning, whereas wheat *SSII* peaked instead in the subjective night (~CT15). In our data,  
414 *TaWaxy* (*GBSSI*) transcripts were present at a very low baseline level (<0.01 TPM) and  
415 without any circadian oscillation. However, another wheat triad, *TaGBSSII*, shared >62%  
416 identity with *Arabidopsis GBSSI*, and the B and D homoeologs had rhythmic expression  
417 which peaked at dawn. *TaWaxy* and *TaGBSSII* are specific to endosperm and leaf tissues,  
418 respectively<sup>66</sup>, which might explain the distribution of transcript accumulation seen here. We  
419 can conclude that the circadian clock regulates the expression of SS transcripts in both  
420 *Arabidopsis* and wheat, although there might be an emphasis on different types of SS in each  
421 species.

422 The *Arabidopsis* circadian clock regulates the rate of starch degradation so that starch  
423 reserves are depleted precisely at subjective dawn<sup>23</sup>. Many transcripts encoding starch-  
424 degrading enzymes in *Arabidopsis* had synchronized dusk peaks: Isoamylase-type starch  
425 debranching enzyme *ISA3*; alpha-amylase *AMY3*; plastidial phosphorylase *PHSI-2*;  
426 disproportionating enzymes *DPEI-2*; glucan, water dikinases *GWD1* and *PWD* and glucan



427 phosphatase *SEX4*. *Arabidopsis* transcripts for *BAM3*, *BAM5* and *PUI* also oscillated with a  
428 circadian rhythm, peaking later in the subjective night. Strikingly, wheat orthologs for several  
429 of these genes were not rhythmic, including *AMY3*, *DPE1*, *PWD*, *PHS1*, *PUI* and *BAMI*.  
430 Wheat orthologs for *ISA3* and *DPE2* were expressed rhythmically, but peaked approximately  
431 8-12 h ahead of their *Arabidopsis* counterparts. Some starch degradation enzymes had  
432 conserved circadian expression patterns in the two species, such as *SEX4*, *GWD1*, *BAM3* and  
433 *BAM5* transcripts. GWD catalyses glucan phosphorylation and *SEX4* encodes a  
434 phosphoglucan phosphatase, both of which facilitate hydrolytic attack by  $\beta$ -amylases (BAM)  
435 in the early steps of starch degradation<sup>59,67</sup>.

436

## 437 Discussion

### 438 Conservation of circadian regulation between homoeologous genes

439 We identified a large proportion of imbalanced circadian triads in our dataset. It was our  
440 initial expectation that there would be strict balance between the majority of circadian  
441 regulated homoeologs due to the critical and finely balanced role the clock has in regulating  
442 the transcriptome, and due to the reported high levels of balance reported from single-  
443 timepoint transcriptomic analysis in wheat<sup>30</sup>. Instead, we find three times as many triads with  
444 imbalanced circadian rhythms as triads with balanced circadian rhythms. This is likely to be  
445 partly due to our multiple classification of circadian imbalance as any triad with different  
446 rhythmicity, period, phase or relative amplitudes between homeologs. Another factor which  
447 distinguishes ratios of transcriptional balance (as defined by Ramírez-González et al. (2018))  
448 and circadian balance is that transcriptional balance within circadian triads is often dynamic  
449 across a time-course, shifting between balanced, dominant and suppressed relationships over  
450 time (Supplementary Fig 6).

451 Most of these imbalanced circadian triads were imbalanced due to arrhythmicity in one or  
452 two homoeologs expressed at a lower mean level than the rhythmic homeologs. The  
453 reduction of expression could be due to constitutive epigenetic silencing or changes to  
454 promoter regions, allowing differential binding of transcription factors<sup>68-70</sup>. These are likely  
455 to be triads where one or two homeologs take responsibility for performing the biological  
456 function of the triad, and the other homoeolog has reduced functionality. We found additional  
457 circadian unbalance in the form of altered phase, period, and relative amplitudes. It is  
458 possible that some of these differences are due to retention of circadian regulation from the



459 ancestral genome of each homeolog (Fig. 1a), although it is likely that other differences  
460 reflect more recent diversification in expression as a step towards neo-functionalisation. It  
461 has been previously suggested that functional divergence is a likely fate for duplicated genes  
462 in a sufficiently large population<sup>71</sup>. In *B. rapa*, 42% of circadian controlled paralogs had  
463 differential expression patterns<sup>29</sup>, however these paralogs arose through whole genome  
464 duplication events around 13-43 million years ago, so have been exposed to longer periods of  
465 time during which selection could act upon these duplicate genes<sup>72</sup>. In comparison,  
466 specialisation of circadian homeologs in wheat could be comparatively lower due to the  
467 relative infancy of its polyploidisation around 10,000 years ago.

468

#### 469 Differences between periods of rhythmic transcripts in *Arabidopsis* and wheat

470 The mean period of circadian regulated genes in wheat was over three hours longer than in  
471 *Arabidopsis*. Period length is affected by a range of exogenous conditions (e.g. light and  
472 temperature), and varies between tissues and plant age<sup>73</sup>. There is also evidence that longer  
473 periods have been selected for during cultivation of crops at higher latitudes<sup>1,2,74</sup>, potentially  
474 due to enhanced seasonal tracking capability enabling precision timing of growth and  
475 flowering<sup>75</sup>. Compared to other plant circadian transcriptome data sets, rhythmic wheat  
476 transcripts also had higher period variance (Fig 1b). The broad period distribution in wheat  
477 might be due to inclusion of all aerial material in our sampling strategy. Variation in free-  
478 running periods could occur at the organ-, tissue- or cellular-level, and transcripts which are  
479 highly expressed in those regions may reflect those period differences<sup>76,77</sup>. An alternative  
480 possibility is that period variation is due to uncoupling of multiple circadian oscillators within  
481 the same cell which control expression of subsets of transcripts<sup>78-80</sup>. Future research could  
482 examine the relationship between period distributions of circadian transcriptomes and the  
483 effects of domestication, latitudinal adaptation, monocot-dicot divergence, or polyploidy.

484

#### 485 Similarities and differences in circadian regulation between wheat and *Arabidopsis*

486 Our analysis revealed extensive conservation of time-of-day specific GO-slim processes and  
487 co-expressed genes between *Arabidopsis* and wheat. These included genes involved in  
488 photosynthesis (e.g., photosystem proteins), light signalling (e.g., *HFRI*, *HY5*, *PINs* etc),  
489 translation (e.g., ribosome proteins) and auxin and ethylene responsive transcription factors.  
490 The striking conservation of photosynthesis related genes was also reflected by the  
491 enrichment of these genes in both balanced wheat triads and similarly expressed circadian

492 paralogs in *Brassica napus*. Photosynthetic outputs have also been reported to be governed  
493 by the circadian clock in the liverwort species *Marchantia polymorpha*, in diazotrophic  
494 cyanobacterium *Cyanothece* sp. and in alga *Aegagropila linnaei*, perhaps suggesting a  
495 widespread control mechanism with an ancient evolutionary origin<sup>81–83</sup>.

496 We also identified several interesting differences between *Arabidopsis* and wheat, including  
497 absence of rhythmicity in wheat *PHY* and *CRY* transcripts and antiphase expression of the  
498 wheat sigma factor *SIG1*. Furthermore, we found differences in rhythmic expression of many  
499 transcripts involved in regulating Tre6P and starch metabolism.

500 In our data, putative wheat homeologs of *TPS1* were arrhythmic. Instead, rhythmic *TPS*  
501 transcripts in wheat had similarity to *Arabidopsis TPS11*, 6 and 7 (Supplementary Fig. 20). In  
502 *Arabidopsis*, *TPS1* is the most catalytically active and best characterised *TPS*, and feeds back  
503 into the entrainment of the circadian clock<sup>54,84</sup>. If the lack of rhythmicity in wheat *TPS1*  
504 transcripts is reflected at the level of protein activity, it may indicate that Tre6P synthesis is  
505 not regulated as tightly by the circadian clock in wheat as in *Arabidopsis*. On the other hand,  
506 circadian control of other *TPS* triads may have implications for biotic or abiotic defence in  
507 wheat. *TPS5-11* have been previously implicated in control of stomatal aperture<sup>85</sup>,  
508 thermotolerance<sup>86</sup>, and defence against fungal, bacterial and aphid attack<sup>87,88</sup>. In rice, *OsTPS8*  
509 influences drought resistance through suberin deposition<sup>89</sup>, and wheat *TaTPS11* participates  
510 in a cold stress response<sup>90</sup>.

511 In wheat, transcripts for starch degradation enzymes (*PHS1*, *DPE1*, *BAM1*, *PUI*, *AMY3*,  
512 *PWD*) and starch biosynthesis enzymes (*PGII*, *PGMI*, *ISAI* and *ATPase*) had either  
513 arrhythmic expression or low relative amplitudes compared with the robust rhythms of many  
514 of these transcripts in *Arabidopsis*. Additionally, *ISA2*, *ISA3* and the starch synthases (*SSI-IV*)  
515 had differing circadian phases between the two species. While it is possible that rhythmic  
516 expression of a reduced number of genes (e.g.: *SEX4*, *GWD1*, *BAM3* and *BAM5*) is sufficient  
517 to mediate circadian control of starch degradation in wheat, these data suggest that the  
518 circadian clock has a less pervasive influence upon transcriptional control of starch  
519 metabolism in wheat compared to *Arabidopsis* (Supplementary Note 8).

520

## 521 Conclusions

522 Our data reveal the influence of circadian regulation on the wheat transcriptome and highlight  
523 several intriguing differences between rhythmically expressed transcripts in *Arabidopsis* and  
524 wheat. It explores the added complexity of co-ordinating circadian expression across multiple  
525 sub-genomes in a hexaploid species. Given the circadian clock has been under selection

526 during domestication and presents multiple targets for crop improvement, it is likely that this  
527 new insight into the clock in wheat will be important in the development of new sustainable  
528 and resilient cultivars. It is our hope that these data provide a resource for identifying target  
529 genes regulated by the circadian clock, allowing the relationships between chronotype, yield  
530 and resilience to be explored in future studies.

531

## 532 Methods

### 533 Plant materials and growth conditions

534 Wheat: Wheat seeds of the spring wheat cv. Cadenza were imbibed for three days on damp  
535 filter paper on a Petri dish at 4°C. Plates were moved at dawn (06.00 = ZT0), to a growth  
536 cabinet set to 22°C under 12:12 light: dark cycles (approximately 200  $\mu\text{mol m}^{-2} \text{s}^{-1}$ ). After  
537 two days, only seedlings with fully emerged radicles were sown, 3 cm deep in Petersfield  
538 cereal mix in 9cm pots. Plants were not vernalized. Seedlings were grown under  
539 12hlight:12hdark conditions for 14 days. After 14 days, at dawn (ZT0) seedlings were  
540 transferred to constant light conditions, tissue was sampled every 4h for 3 days (18 samples  
541 in total). At each timepoint, we sampled the entire aerial tissue from 3 replicate plants, which  
542 was frozen immediately in liquid nitrogen before storage at -80°C. Total RNA was extracted  
543 using Qiagen RNeasy plant mini kits (cat. no. 74904) with on-column DNase treatment  
544 (RNase-Free DNase Set (cat. no. 79254). RNA concentration and integrity were quantified  
545 using a Nanodrop Spectrophotometer and Perkin Elmer LabChip GX Nucleic acid analyser  
546 before sequencing.

547 Details of growth conditions for *Arabidopsis*<sup>26</sup>, *Brassica rapa*<sup>29</sup>, *Brachypodium distachyon*<sup>27</sup>  
548 and *Glycine max*<sup>28</sup> datasets can be viewed in their source manuscripts. Briefly, all circadian  
549 data were measured under constant light and temperature following 12h:12h light:dark  
550 entrainment other than *Glycine max*<sup>28</sup> which was entrained under 16h:8h light:dark cycles.

### 551 Wheat mRNA sequencing, read alignment and quantification

552 Library preparation was carried out following the Illumina TruSeq protocol and reads were  
553 sequenced on a NovaSeq S2 flow cell at the Earlham Institute. 150bp paired-end reads were  
554 generated from each library to an average depth of 84M reads per replicate. Reads were  
555 filtered for quality and any remaining adaptor sequence was trimmed with Trimmomatic<sup>91</sup>.  
556 Surviving reads were aligned to the Chinese Spring RefSeq v1.1 wheat genome<sup>11</sup> using

557 HISAT2<sup>92</sup> with default parameters. Uniquely mapping reads were then quantified using  
558 StringTie<sup>93</sup> and TPM values were extracted for each gene per sample.

#### 559 Processing and quantification of previously published datasets

560 Raw reads from previously published circadian datasets were downloaded for *Arabidopsis*<sup>26</sup>,  
561 *Brassica rapa*<sup>29</sup>, and *Brachypodium distachyon*<sup>27</sup>. These reads were filtered for quality, and  
562 any remaining adaptor sequence trimmed with Trimmomatic<sup>91</sup>. Surviving reads were aligned  
563 using HISAT2<sup>92</sup> to *A. thaliana* genome (TAIR 10), *B. rapa* genome (v1.0) and the *B.*  
564 *distachyon* genome (v3.0) respectively. For the *Arabidopsis* alignment, maximum intron  
565 length was set to 5000nt consistent with pre-processing in<sup>26,94</sup>. StringTie<sup>93</sup> was used to  
566 quantify uniquely mapping reads before TPM value extraction at gene level. For *Glycine*  
567 *max*<sup>28</sup>, FPKM normalised reads were downloaded from the *Glycine max* RNA-seq Database<sup>95</sup>  
568 (accession GSE94228) and were converted from FPKM to TPM prior to analysis.

569

#### 570 Homolog identification of circadian clock and circadian controlled genes

571 Wheat homologs of *Arabidopsis* core circadian clock genes were identified in the wheat  
572 genome by detecting similarity to the following conserved protein family domains that are  
573 present in the proteins encoded by these genes: MYB1R, a subtype of MYB domain that  
574 contains a distinctive SHAQKY sequence motif (present in the CCA1, LHY and RVE[1-8])  
575 or a distinctive SHLQKY sequence motif (present in LUX), PAS (present in ZTL), PRR  
576 (present in TOC1 and PRR[3579]) and ELF4 (present in ELF4). A hidden Markov model  
577 (HMM) for each domain was used in HMMER 3.2.1 HMMSEARCH<sup>96</sup> to search for  
578 members of the domain family in the following proteome datasets: Araport11 (*Arabidopsis*  
579 *thaliana*), RGAP7 (*Oryza sativa*), JGI Phytozome version 12 (*Brachypodium distachyon*),  
580 IBSC (*Hordeum vulgare*), SpudDB PGSC v4.03 (*Solanum tuberosum*) and IWGSC Refseq  
581 v1.1 (*Triticum aestivum*). The HMMs provided by Pfam (<https://pfam.xfam.org/>) were used  
582 for the PAS domain (PAS\_9, PF13426), the PRR domain (Response\_reg, PF00072) and the  
583 ELF4 domain (PF07011). For the MYB domain, an HMM was built for the MYB1R  
584 subfamily using HMMER3 HMMBUILD<sup>96</sup> with an alignment of protein sequences from  
585 *Arabidopsis* and rice, previously established as being members of this subfamily. The  
586 sequences found from these genomes were re-aligned to the original alignment using  
587 HMMER 3.2.1 HMMALIGN<sup>96</sup>. Amino acids with non-match states in the HMM were  
588 removed from the alignment and alignment columns with <70% occupancy were also

589 removed. The longest splice variant of each protein was selected to estimate a phylogenetic  
590 tree with bootstrap support using RAxML 8.2.12<sup>97</sup> with the following method parameters set:  
591 -f a, -x 12345, -p 12345, -# 100, -m PROTCATJTT. The trees were mid-point rooted and  
592 images created using the Interactive Tree of Life (iTOL) tool<sup>98</sup>. For the larger MYB and PRR  
593 families, proteins from the tree clades containing known clock gene(s) were re-aligned across  
594 their full-length and a “nested” phylogenetic tree was re-estimated with RAxML as described  
595 above. The tree was visualised in the Interactive Tree Of Life (iTOL) website alongside the  
596 corresponding alignment. This view provided increased detail about the relationships within  
597 the clade and enabled orthologous sequences to be inferred. Wheat homologues for *ELF3*,  
598 *GI*, *LWD1/2*, *CHE*, and *LNK1/2* were identified by BLASTP searches using previously  
599 identified wheat and *Brachypodium* predicted proteins confirmed by reciprocal BLAST  
600 searches against *Arabidopsis*. IDs and source references can be viewed in Supplementary  
601 Table 8.

602 Putative wheat orthologs for *Arabidopsis* circadian controlled pathway genes involved in  
603 photosynthesis, light-signalling and primary metabolism were first extracted using Biomart  
604 v0.7<sup>99</sup> available from Ensembl Plants and taken forward if they had >40% identity in the  
605 DNA sequence. Orthologs were then verified using BLASTP using *Arabidopsis* protein  
606 sequences as a query against the wheat protein database to confirm the wheat gene IDs.  
607 Complete lists of wheat gene IDs used in the pathway analysis can be viewed in  
608 Supplementary Table 11.

609

## 610 Circadian quantification using Metacycle and Biodare2

611 To estimate proportions of rhythmic genes expressed in *Arabidopsis* and wheat, we removed  
612 only genes with 0 TPM at all timepoints. This approach has been used in several previous  
613 studies<sup>26,100,101</sup> and allows detection of low-expression rhythmic transcripts. An analysis of  
614 how filtering for low-expression genes affects the estimates of proportions of rhythmically  
615 expressed genes is discussed in Supplementary Note 1 and Supplementary Table 1.

616 The R package MetaCycle<sup>102</sup> was used to identify rhythmically expressed transcripts  
617 (Benjamini-Hochberg *q*-values) and to quantify period lengths (hours), absolute phase  
618 (hours), baseline expression (TPM), amplitudes (TPM) and relative amplitudes of circadian  
619 waveforms. Relative amplitude is the ratio between amplitude and baseline TPM if the  
620 baseline is greater than 1. Metacycle integrates results from three independent algorithms  
621 (ARSER, JTK\_CYCLE and Lomb-Scargle) to produce summary “meta2d” statistics that

622 combine the outcome from these algorithms. Metacycle was run using the following  
623 parameters; minper = 12, maxper = 35, adjustPhase = "predictedPer". Transcripts were  
624 defined as rhythmic if they had  $q$ -values  $< 0.05$  and high confidence rhythmic transcripts if  
625 they have  $q$ -values  $< 0.01$ . To calculate circadian phase (CT; relative to period length=24),  
626 meta2d phase estimates were multiplied by 24 and then divided by the period estimates for  
627 each transcript. Circular phase means were calculated using the package 'circular'  
628 implemented in R<sup>103</sup>.  
629 There are many different algorithms available for quantification of rhythmicity within time-  
630 series data, some of which perform better on datasets with higher levels of noise, non-24h  
631 periods or various sampling frequencies. To validate the meta2d results we also used the  
632 FFT-NLLS and MESA algorithms implemented in Biodare2 to verify our observations about  
633 period, phase and rhythmicity<sup>104</sup>. FFT-NLLS also provides relative amplitude error (RAE)  
634 statistics which represent a useful metric for assessing rhythmic robustness. FFT-NLLS and  
635 MESA were run using the BH  $q < 0.01$  filtered transcripts categorized in Metacycle, and with  
636 the following parameters: no dtr, min-max, p(12.0-35.0).  
637 To enable as close a comparison with the *Arabidopsis* dataset as possible, the wheat time-  
638 course was cropped to a data window of 24-68h for approximation of period, phase and  
639 relative amplitude unless specified otherwise. This data-window also ensures that  
640 measurements are being made under circadian conditions following transfer to constant light.  
641 For the triad analysis, meta2d estimates were measured over the full time-course (0-68h) as  
642 differentiation of homeolog behaviour was the main interest, including the response to  
643 transfer to L:L.

644

#### 645 Clustering of rhythmic genes into expression modules

646 Gene co-expression analysis was carried out using the R package WGCNA (Langfelder and  
647 Horvath, 2008; R version 3.6.0.).  
648 *Arabidopsis*: The 10,317 genes identified by MetaCycle as significantly rhythmic ( $q$ -value  $<$   
649 0.01) were filtered and genes with greater than 0.5 TPM average expression at more than  
650 three timepoints were retained for further analysis. The average expression at each timepoint  
651 for the remaining 10,129 genes was used to construct signed hybrid networks on a replicate  
652 basis using the blockwiseModules() function. The soft power threshold was calculated as 18,  
653 and the following parameters were used; minModuleSize = 30, corType = bicor,  
654 maxPOutliers = 0.05, mergeCutHeight = 0.15. Highly connected hub genes were identified



655 for each of the 9 co-expression modules using the function `chooseTopHubInEachModule()`  
656 and eigengenes were identified for each module using the `moduleEigengenes()` function.  
657 Wheat: The 18,633 genes identified by MetaCycle as significantly rhythmic across 12  
658 timepoints ZT24 - ZT68 (q-value < 0.01) were filtered and genes with greater than 0.5 TPM  
659 average expression at more than three timepoints were retained for further analysis. The  
660 average expression at each timepoint for the remaining 16,327 genes was used to construct  
661 signed hybrid networks using the `blockwiseModules()` function. A soft power threshold of 18  
662 was used, together with the following parameters; `minModuleSize = 30`, `corType = bicor`,  
663 `maxPOutliers = 0.05`, `mergeCutHeight = 0.15`. Eigengenes were identified for each module  
664 using the `moduleEigengenes()` function. Modules with closely correlated eigengenes were  
665 merged using the `mergeCloseModules()` function, with the parameters; `cutHeight = 0.25`,  
666 `iterate = F`) and new module eigengenes were calculated for the resulting 9 modules.  
667

#### 668 Cross-correlation analysis

669 A cross-correlation analysis was used to find the shift in time (lag) which produced the  
670 highest (peak) correlation between two rhythms. This approach was used to identify modules  
671 which peaked synchronously (had a peak lag of 0h) or asynchronously (had a peak lag of 4, 8  
672 or 12h) by correlating eigengenes for each module (Supplementary Fig. 9). We also used  
673 cross-correlation to identify imbalanced phases within rhythmic triads (Fig. 1E). Before  
674 calculating the cross-correlation between two expression rhythms, we first scaled both  
675 expression patterns using their means and standard deviations, so the output reflects a time-  
676 dependent Pearson correlation coefficient ranging between -1 and 1:

$$677 \quad Z_A = \frac{X_A - \bar{X}_A}{S_A}, Z_B = \frac{X_B - \bar{X}_B}{S_B}$$

678 Where  $Z_i$ ,  $X_i$ ,  $\bar{X}_i$  and  $S_i$  represent the standardised expression level, tpm expression level,  
679 mean expression level, and standard deviation of gene A and B respectively. Once both  
680 expression patterns have been scaled, the discrete cross-correlation between the two  
681 expression patterns is calculated using the `np.correlate` function and is divided by the number  
682 of time points in the expression signal returning the Pearson correlation coefficient at  
683 different lags. The index of the array with the largest Pearson correlation coefficient score  
684 corresponds to the lag that maximises the phase similarity between the two temporal  
685 expression patterns.

## 686 Mean-normalised data for oscillation plots

687 Oscillation plots in Supplementary Fig. 18-20 were mean normalised to aid visualisation of  
688 period and phase differences between transcripts. Data was adjusted by dividing the TPM  
689 values at each timepoint by the mean across all timepoints for each gene so that the baseline  
690 expression was equal to 1.

## 691 Gene ontology term enrichment

692 Functional enrichment of differentially expressed genes for biological processes within each  
693 module was performed using the gene ontology enrichment analysis package, topGO<sup>105</sup> in R  
694 (version 3.6.0, with the following parameters: nodeSize = 10, algorithm = "parentchild",  
695 classicFisher test  $p < 0.05$ ). Enrichment of terms in all rhythmic genes in *Arabidopsis* and  
696 wheat was compared against a background 'gene universe' of all expressed genes in each  
697 dataset (26,392 genes for *Arabidopsis* and 86,567 for wheat). This gene universe was also  
698 used in the GO-slim analysis for enrichment in circadian balanced versus imbalanced triads.  
699 Enrichment of terms in expression modules was compared against a background of all  
700 rhythmically expressed genes (BH  $q < 0.01$ ) which clustered into modules in each dataset  
701 (10,129 genes for *Arabidopsis* and 16,327 for wheat). GO-slim terms refer to ontology terms  
702 for biological processes unless otherwise specified and were obtained from Ensembl Plants  
703 51<sup>11</sup>, using the BioMart tool. The bubble plot was plotted using ggplot in R adapting code  
704 from De Vega et al., 2021<sup>106</sup>.

705 Enrichment of GO-slim terms in *B. rapa* circadian paralogs with similar and differential  
706 expression patterns was conducted using previously published DiPALM results for pattern  
707 change in a LDHC circadian time course (Supplementary File 4, Greenham et al. 2020<sup>29</sup>).  
708 Paralog pairs with a pattern change  $p$ -value of  $< 0.001$  were termed differential patterns and  
709 pairs with a pattern change  $p$ -value of  $> 0.1$  were considered to be similar patterns. In this  
710 analysis we ignored differences in expression change for consistency with our wheat triads.  
711 Data was first filtered for rhythmicity using Metacycle  $q$ -values  $< 0.01$ . Only paralog pairs  
712 with two significantly rhythmic paralogs were retained for the GO-slim analysis. Enrichment  
713 of terms in similarly expressed circadian paralogs (1562 genes) or differentially expressed  
714 paralogs (1438 genes) in *B. napus* was compared against a background of 4646 genes  
715 expressed in the Greenham dataset in paralogs and which had GO-slim annotation available.

716

717

718 Enrichment analysis of transcription factor superfamilies in wheat co-expression modules

719 Genes annotated as members of transcription factor superfamilies<sup>30</sup> were identified in each  
720 co-expression module and the frequency of each TF superfamily compared to the frequency  
721 observed in the 16,327 genes submitted to WGCNA. TF families were classed as either  
722 significantly under or overrepresented in each module using Fisher's exact test ( $p \leq 0.05$ ).  
723

724 Enrichment analysis of transcription factor binding sites in wheat co-expression modules

725 1.5 kb of sequence upstream of the transcription start site (TSS) was extracted for each of the  
726 16,327 genes submitted to WGCNA. FIMO, from the MEME tool suite (v 4.11.1) was used  
727 to predict TFBS in these regions based on similarity with previously DAP-seq validated  
728 TFBS identified in *Arabidopsis*<sup>107</sup>. FIMO was run as reported in Ramírez-González et al.,  
729 2018 (p-value threshold of  $<1e-04$  (default), --motifpseudo set to  $1e-08$  as recommended for  
730 use with PWMs and a --max-stored-scores of 1,000,000). The background model was  
731 generated from the 16,327 promoter sequences using MEME fasta-get-markov. As the  
732 significance of multiple matches of a single TFBS family in the putative promoter region for  
733 each gene is unknown, we derived a non-redundant (nr) list of matched TFBS motifs for each  
734 gene within each of the nine modules and for the complete set of 16,327 genes, where  
735 multiple occurrences of a TFBS superfamily in a single promoter sequence were only  
736 counted once. The frequency of these nrTFBS motifs for each co-expression module was  
737 compared to the frequency of nrTFBS seen across all 16,327 genes and families significantly  
738 under or overrepresented in each module were identified using Fisher's exact test ( $p \leq 0.05$ ).  
739

740 Loom plots

741 Genome position data for the plots are based on annotations from Chinese spring  
742 (*Triticum\_aestivum*.IWGSC.52.gtf) downloaded from Ensembl Plants. Code for creating  
743 Loom plots (Supplementary Fig 8) is implemented in R and a code package with  
744 accompanying R markdown notebooks is available from our groups GitHub repository  
745 (<https://github.com/AHallLab/triad.expression>).

746 Statistical analysis

747 Statistical tests including Welch's two sample t-test, Two-proportions z-test, One-way  
748 ANOVA, Two-level, nested ANOVA and Chi-square tests of independence were all  
749 conducted in the R 'stats' package (version 4.0.0) with default parameters.

750

751 Data availability

752 Fastq data from the RNA-seq circadian time course are available to view from the Grassroots  
753 Data Repository: [https://opendata.earlham.ac.uk/opendata/data/wheat\\_circadian\\_Rees\\_2021](https://opendata.earlham.ac.uk/opendata/data/wheat_circadian_Rees_2021).

754 [Data will be uploaded to the European Nucleotide Archive (ENA) during the review

755 process] A summary csv table with expression of wheat genes (TPM), Metacycle estimates,  
756 gene annotations and triad balance classification can be viewed in Supplementary Table 12

757 also available here:

758 [https://opendata.earlham.ac.uk/opendata/data/wheat\\_circadian\\_Rees\\_2021](https://opendata.earlham.ac.uk/opendata/data/wheat_circadian_Rees_2021).

759

760 References

- 761 1. Greenham, K. *et al.* Geographic variation of plant circadian clock function in natural and agricultural  
762 settings. *J. Biol. Rhythms* **32**, 26–34 (2017).
- 763 2. Müller, N. A. *et al.* Domestication selected for deceleration of the circadian clock in cultivated tomato.  
764 *Nat. Genet.* **48**, 89–93 (2016).
- 765 3. McClung, C. R. Circadian Clock Components Offer Targets for Crop Domestication and Improvement.  
766 *Genes (Basel)*. **12**, 374 (2021).
- 767 4. Steed, G., Ramirez, D. C., Hannah, M. A. & Webb, A. A. R. Chronoculture, harnessing the circadian  
768 clock to improve crop yield and sustainability. *Science (80-. )*. **372**, (2021).
- 769 5. Hazen, S. P. *et al.* LUX ARRHYTHMO encodes a Myb domain protein essential for circadian rhythms.  
770 *Proc. Natl. Acad. Sci. U. S. A.* **102**, 10387–10392 (2005).
- 771 6. Nakamichi, N., Kita, M., Ito, S., Yamashino, T. & Mizuno, T. PSEUDO-RESPONSE REGULATORS,  
772 PRR9, PRR7 and PRR5, Together play essential roles close to the circadian clock of *Arabidopsis*  
773 *thaliana*. *Plant Cell Physiol.* **46**, 686–698 (2005).
- 774 7. Somers, D. E., Webb, A. A. R., Pearson, M. & Kay, S. A. The short-period mutant, *toc1-1*, alters  
775 circadian clock regulation of multiple outputs throughout development in *Arabidopsis thaliana*.  
776 *Development* **125**, 485–494 (1998).
- 777 8. Wang, Z. Y. & Tobin, E. M. Constitutive expression of the CIRCADIAN CLOCK ASSOCIATED 1  
778 (CCA1) gene disrupts circadian rhythms and suppresses its own expression. *Cell* **93**, 1207–1217 (1998).
- 779 9. Salamini, F., Özkan, H., Brandolini, A., Schäfer-Pregl, R. & Martin, W. Genetics and geography of wild  
780 cereal domestication in the near east. *Nature Reviews Genetics* vol. 3 429–441 (2002).
- 781 10. Araus, J. L., Slafer, G. A., Romagosa, I. & Molist, M. FOCUS: Estimated wheat yields during the

- 782 emergence of agriculture based on the carbon isotope discrimination of grains: Evidence from a 10th  
783 millennium BP site on the euphrates. *J. Archaeol. Sci.* **28**, 341–350 (2001).
- 784 11. IWGSC *et al.* Shifting the limits in wheat research and breeding using a fully annotated reference  
785 genome. *Science (80-. )*. **361**, (2018).
- 786 12. Hernando, C. E., Romanowski, A. & Yanovsky, M. J. Transcriptional and post-transcriptional control of  
787 the plant circadian gene regulatory network. *Biochim. Biophys. Acta - Gene Regul. Mech.* **1860**, 84–94  
788 (2017).
- 789 13. Chaw, S. M., Chang, C. C., Chen, H. L. & Li, W. H. Dating the monocot-dicot divergence and the  
790 origin of core eudicots using whole chloroplast genomes. *J. Mol. Evol.* **58**, 424–441 (2004).
- 791 14. Turner, A., Beales, J., Faure, S., Dunford, R. P. & Laurie, D. A. The pseudo-response regulator Ppd-H1  
792 provides adaptation to photoperiod in barley. *Science (80-. )*. **310**, 1031–1034 (2005).
- 793 15. Shaw, L. M., Turner, A. S. & Laurie, D. A. The impact of photoperiod insensitive Ppd-1a mutations on  
794 the photoperiod pathway across the three genomes of hexaploid wheat (*Triticum aestivum*). *Plant J.* **71**,  
795 71–84 (2012).
- 796 16. Laurie, D. A. Comparative genetics of flowering time. *Plant Mol. Biol.* **35**, 167–177 (1997).
- 797 17. Xiang, Y. Z., Mao, S. L., Jia, R. L., Chun, M. G. & Xian, S. Z. The wheat TaG11, involved in  
798 photoperiodic flowering, encodes an Arabidopsis GI ortholog. *Plant Mol. Biol.* **58**, 53–64 (2005).
- 799 18. Zikhali, M., Wingen, L. U. & Griffiths, S. Delimitation of the Earliness per se D1 (Eps-D1) flowering  
800 gene to a subtelomeric chromosomal deletion in bread wheat (*Triticum aestivum*). *J. Exp. Bot.* **67**, 287–  
801 299 (2016).
- 802 19. Wang, J. *et al.* TaELF3-1DL, a homolog of ELF3, is associated with heading date in bread wheat. *Mol.*  
803 *Breed.* **36**, 1–9 (2016).
- 804 20. Mizuno, N., Nitta, M., Sato, K. & Nasuda, S. A wheat homologue of PHYTOCLOCK 1 is a candidate  
805 gene conferring the early heading phenotype to einkorn wheat. *Genes Genet. Syst.* **87**, 357–367 (2012).
- 806 21. Zhang, W. *et al.* Functional studies of heading date-related gene TaPRR73, a paralog of ppd1 in  
807 common wheat. *Front. Plant Sci.* **7**, 772 (2016).
- 808 22. Dodd, A. N. *et al.* Plant circadian clocks increase photosynthesis, growth, survival, and competitive  
809 advantage. *Science (80-. )*. **309**, 630–633 (2005).
- 810 23. Graf, A., Schlereth, A., Stitt, M. & Smith, A. M. Circadian control of carbohydrate availability for  
811 growth in Arabidopsis plants at night. *Proc. Natl. Acad. Sci. U. S. A.* **107**, 9458–9463 (2010).
- 812 24. Harmer, S. L. *et al.* Orchestrated transcription of key pathways in Arabidopsis by the circadian clock.  
813 *Science (80-. )*. **290**, 2110–3 (2000).
- 814 25. Millar, A. J. & Kay, S. A. Circadian Control of cab Gene Transcription and mRNA Accumulation in  
815 Arabidopsis. *Plant Cell* **3**, 541–550 (1991).
- 816 26. Romanowski, A., Schlaen, R. G., Perez-Santangelo, S., Mancini, E. & Yanovsky, M. J. Global  
817 transcriptome analysis reveals circadian control of splicing events in Arabidopsis thaliana. *Plant J.* **103**,  
818 889–902 (2020).
- 819 27. MacKinnon, K. J. M. *et al.* Changes in ambient temperature are the prevailing cue in determining  
820 *Brachypodium distachyon* diurnal gene regulation. *New Phytol.* **227**, 1709–1724 (2020).
- 821 28. Li, M. *et al.* Comprehensive mapping of abiotic stress inputs into the soybean circadian clock. *Proc.*

- 822 *Natl. Acad. Sci.* **116**, 23840–23849 (2019).
- 823 29. Greenham, K. *et al.* Expansion of the circadian transcriptome in *Brassica rapa* and genome-wide  
824 diversification of paralog expression patterns. *Elife* **9**, 1–68 (2020).
- 825 30. Ramírez-González, R. H. *et al.* The transcriptional landscape of polyploid wheat. *Science* (80-. ). **361**,  
826 (2018).
- 827 31. Zhao, J. *et al.* Genome-Wide Identification and Expression Profiling of the TCP Family Genes in Spike  
828 and Grain Development of Wheat (*Triticum aestivum* L.). *Front. Plant Sci.* **9**, (2018).
- 829 32. Takumi, S., Shimamura, C. & Kobayashi, F. Increased freezing tolerance through up-regulation of  
830 downstream genes via the wheat CBF gene in transgenic tobacco. *Plant Physiol. Biochem.* **46**, 205–211  
831 (2008).
- 832 33. Jouffe, C. *et al.* The Circadian Clock Coordinates Ribosome Biogenesis. *PLoS Biol.* **11**, 1001455  
833 (2013).
- 834 34. Correa, A. *et al.* Multiple oscillators regulate circadian gene expression in *Neurospora*. *Proc. Natl.*  
835 *Acad. Sci.* **100**, 13597–13602 (2003).
- 836 35. Mao, G., Seebeck, T., Schrenker, D. & Yu, O. CYP709B3, a cytochrome P450 monooxygenase gene  
837 involved in salt tolerance in *Arabidopsis thaliana*. *BMC Plant Biol.* **13**, 1–13 (2013).
- 838 36. Pan, Y. *et al.* Cytochrome P450 monooxygenases as reporters for circadian-regulated pathways. *Plant*  
839 *Physiol.* **150**, 858–878 (2009).
- 840 37. Spitzer, C. *et al.* The ESCRT-Related CHMP1A and B Proteins Mediate Multivesicular Body Sorting of  
841 Auxin Carriers in *Arabidopsis* and Are Required for Plant Development. *Plant Cell* **21**, 749–766 (2009).
- 842 38. Bao, Y. *et al.* The tumor necrosis factor receptor-associated factor (TRAF)-like family protein SEVEN  
843 IN ABSENTIA 2 (SINA2) promotes drought tolerance in an ABA-dependent manner in *Arabidopsis*.  
844 *New Phytol.* **202**, 174–187 (2014).
- 845 39. Noordermeer, M. A., Veldink, G. A. & Vliegenthart, J. F. G. Fatty acid hydroperoxide lyase: A plant  
846 cytochrome P450 enzyme involved in wound healing and pest resistance. *ChemBioChem* **2**, 494–504  
847 (2001).
- 848 40. Murakami, M., Ashikari, M., Miura, K., Yamashino, T. & Mizuno, T. The Evolutionarily Conserved  
849 OsPRR Quintet: Rice Pseudo-Response Regulators Implicated in Circadian Rhythm. *Plant Cell Physiol.*  
850 **44**, 1229–1236 (2003).
- 851 41. Shalit-Kaneh, A., Kumimoto, R. W., Filkov, V. & Harmer, S. L. Multiple feedback loops of the  
852 *Arabidopsis* circadian clock provide rhythmic robustness across environmental conditions. *Proc. Natl.*  
853 *Acad. Sci. U. S. A.* **115**, 7147–7152 (2018).
- 854 42. Hsu, P. Y., Devisetty, U. K. & Harmer, S. L. Accurate timekeeping is controlled by a cycling activator  
855 in *Arabidopsis*. *Elife* **2013**, 473 (2013).
- 856 43. Hou, X., Fu, A., Garcia, V. J., Buchanan, B. B. & Luan, S. PSB27: A thylakoid protein enabling  
857 *Arabidopsis* to adapt to changing light intensity. *Proc. Natl. Acad. Sci.* **112**, 1613–1618 (2015).
- 858 44. Ponnu, J. & Hoecker, U. Illuminating the COP1/SPA Ubiquitin Ligase: Fresh Insights Into Its Structure  
859 and Functions During Plant Photomorphogenesis. *Front. Plant Sci.* **0**, 486 (2021).
- 860 45. Jang, I.-C., Henriques, R. & Chua, N.-H. Three Transcription Factors, HFR1, LAF1 and HY5, Regulate  
861 Largely Independent Signaling Pathways Downstream of Phytochrome A. *Plant Cell Physiol.* **54**, 907–



- 862 916 (2013).
- 863 46. Nakamura, Y., Kato, T., Yamashino, T., Murakami, M. & Mizuno, T. Characterization of a set of  
864 phytochrome-interacting factor-like bHLH proteins in *Oryza sativa*. *Biosci. Biotechnol. Biochem.* **71**,  
865 1183–1191 (2007).
- 866 47. Noordally, Z. B. *et al.* Circadian Control of Chloroplast Transcription by a Nuclear-Encoded Timing  
867 Signal. *Science (80-. )*. **339**, 1316–1319 (2013).
- 868 48. Tanaka, K. *et al.* Characterization of three cDNA species encoding plastid RNA polymerase sigma  
869 factors in *Arabidopsis thaliana*: Evidence for the sigma factor heterogeneity in higher plant plastids.  
870 *FEBS Lett.* **413**, 309–313 (1997).
- 871 49. Kanamaru, K. *et al.* Plastidic RNA polymerase  $\sigma$  factors in *Arabidopsis*. *Plant Cell Physiol.* **40**, 832–  
872 842 (1999).
- 873 50. Allison, L. A. The role of sigma factors in plastid transcription. *Biochimie* vol. 82 537–548 (2000).
- 874 51. Kanamaru, K. & Tanaka, K. Roles of chloroplast RNA polymerase sigma factors in chloroplast  
875 development and stress response in higher plants. *Biosci. Biotechnol. Biochem.* **68**, 2215–2223 (2004).
- 876 52. Shimizu, M. *et al.* Sigma factor phosphorylation in the photosynthetic control of photosystem  
877 stoichiometry. *Proc. Natl. Acad. Sci. U. S. A.* **107**, 10760–10764 (2010).
- 878 53. Figueroa, C. M. & Lunn, J. E. A tale of two sugars: Trehalose 6-phosphate and sucrose. *Plant*  
879 *Physiology* vol. 172 7–27 (2016).
- 880 54. Frank, A. *et al.* Circadian Entrainment in *Arabidopsis* by the Sugar-Responsive Transcription Factor  
881 bZIP63. *Curr. Biol.* **28**, 2597-2606.e6 (2018).
- 882 55. Fichtner, F. & Lunn, J. E. The Role of Trehalose 6-Phosphate (Tre6P) in Plant Metabolism and  
883 Development. *Annu. Rev. Plant Biol.* **72**, 737–760 (2021).
- 884 56. Paul, M. J., Gonzalez-Uriarte, A., Griffiths, C. A. & Hassani-Pak, K. The Role of Trehalose 6-  
885 Phosphate in Crop Yield and Resilience. *Plant Physiol.* **177**, 12–23 (2018).
- 886 57. Gruber, A. V. & Feiz, L. Rubisco assembly in the chloroplast. *Frontiers in Molecular Biosciences* vol. 5  
887 24 (2018).
- 888 58. Bhat, J. Y., Thieulin-Pardo, G., Hartl, F. U. & Hayer-Hartl, M. Rubisco activases: AAA+ chaperones  
889 adapted to enzyme repair. *Frontiers in Molecular Biosciences* vol. 4 20 (2017).
- 890 59. Smith, S. M. *et al.* Diurnal changes in the transcriptome encoding enzymes of starch metabolism  
891 provide evidence for both transcriptional and posttranscriptional regulation of starch metabolism in  
892 *arabidopsis* leaves. *Plant Physiol.* **136**, 2687–2699 (2004).
- 893 60. Periappuram, C. *et al.* The Plastidic Phosphoglucomutase from *Arabidopsis*. A Reversible Enzyme  
894 Reaction with an Important Role in Metabolic Control. *Plant Physiol.* **122**, 1193 (2000).
- 895 61. Bahaji, A. *et al.* Plastidic phosphoglucose isomerase is an important determinant of starch accumulation  
896 in mesophyll cells, growth, photosynthetic capacity, and biosynthesis of plastidic cytokinins in  
897 *Arabidopsis*. *PLoS One* **10**, e0119641 (2015).
- 898 62. Lee, S. K. *et al.* Plastidic phosphoglucomutase and ADP-glucose pyrophosphorylase mutants impair  
899 starch synthesis in rice pollen grains and cause male sterility. *J. Exp. Bot.* **67**, 5557–5569 (2016).
- 900 63. Nielsen, M. M. *et al.* Crystal structures of the catalytic domain of *Arabidopsis thaliana* starch synthase  
901 IV, of granule bound starch synthase from CLg1 and of granule bound starch synthase I of *Cyanophora*

- 902           paradoxa illustrate substrate recognition in starch synthases. *Front. Plant Sci.* **9**, 1138 (2018).
- 903   64.   Tenorio, G., Orea, A., Romero, J. M. & Mérida, Á. Oscillation of mRNA level and activity of granule-  
904           bound starch synthase I in Arabidopsis leaves during the day/night cycle. *Plant Mol. Biol.* **51**, 949–958  
905           (2003).
- 906   65.   Yamamori, M., Nakamura, T., Endo, T. R. & Nagamine, T. Waxy protein deficiency and chromosomal  
907           location of coding genes in common wheat. *Theor. Appl. Genet.* **89**, 179–184 (1994).
- 908   66.   Vrinten, P. L. & Nakamura, T. Wheat granule-bound starch synthase I and II are encoded by separate  
909           genes that are expressed in different tissues. *Plant Physiol.* **122**, 255–263 (2000).
- 910   67.   Kaplan, F., Sung, D. Y. & Guy, C. L. Roles of  $\beta$ -amylase and starch breakdown during temperatures  
911           stress. *Physiol. Plant.* **126**, 120–128 (2006).
- 912   68.   Otto, S. P. The Evolutionary Consequences of Polyploidy. *Cell* **131**, 452–462 (2007).
- 913   69.   Gardiner, L. J. *et al.* A genome-wide survey of DNA methylation in hexaploid wheat. *Genome Biol.* **16**,  
914           1–15 (2015).
- 915   70.   Chen, Z. J. & Mas, P. Interactive roles of chromatin regulation and circadian clock function in plants.  
916           *Genome Biol.* **20**, 1–12 (2019).
- 917   71.   Walsh, J. B. How often do duplicated genes evolve new functions? *Genetics* **139**, 421–428 (1995).
- 918   72.   Lou, P. *et al.* Preferential retention of circadian clock genes during diploidization following whole  
919           genome triplication in Brassica rapa. *Plant Cell* **24**, 2415–2426 (2012).
- 920   73.   Rees, H. *et al.* A high-throughput delayed fluorescence method reveals underlying differences in the  
921           control of circadian rhythms in Triticum aestivum and Brassica napus. *Plant Methods* **15**, 51 (2019).
- 922   74.   Yarkhunova, Y. *et al.* Selection during crop diversification involves correlated evolution of the  
923           circadian clock and ecophysiological traits in Brassica rapa. *New Phytol.* **210**, 133–144 (2016).
- 924   75.   Michael, T. P. *et al.* Enhanced Fitness Conferred by Naturally Occurring Variation in the Circadian  
925           Clock. *Science (80- )*. **302**, 1049–1053 (2003).
- 926   76.   Gould, P. D. *et al.* Coordination of robust single cell rhythms in the Arabidopsis circadian clock via  
927           spatial waves of gene expression. *Elife* **7**, (2018).
- 928   77.   Takahashi, N., Hirata, Y., Aihara, K. & Mas, P. A Hierarchical Multi-oscillator Network Orchestrates  
929           the Arabidopsis Circadian System. *Cell* **163**, 148–159 (2015).
- 930   78.   Locke, J. C. W. *et al.* Experimental validation of a predicted feedback loop in the multi-oscillator clock  
931           of Arabidopsis thaliana. *Mol. Syst. Biol.* **2**, 59 (2006).
- 932   79.   Hall, A., Kozma-Bognár, L., Bastow, R. M., Nagy, F. & Millar, A. J. Distinct regulation of CAB and  
933           PHYB gene expression by similar circadian clocks. *Plant J.* **32**, 529–537 (2002).
- 934   80.   Hotta, C. T. *et al.* Are there multiple circadian clocks in plants? *Plant Signal. Behav.* **3**, 342 (2008).
- 935   81.   Cuitun-Coronado, D., Rees, H., Hall, A., de Barros Dantas, L. L. & Dodd, A. N. Circadian and diel  
936           regulation of photosynthesis in the bryophyte Marchantia polymorpha. *bioRxiv* (2022)  
937           doi:10.1101/2022.01.11.475783.
- 938   82.   Cano-Ramirez, D., Fraine, T., Griffiths, O. & Dodd, A. Photosynthesis and circadian rhythms regulate  
939           the buoyancy of marimo lake balls. *Curr. Biol.* **28**, R869–R870 (2018).
- 940   83.   Schneegeurt, M. A., Tucker, D. L., Ondr, J. K., Sherman, D. M. & Sherman, L. A. Metabolic rhythms of  
941           a diazotrophic cyanobacterium, cyanospora sp. strain atcc 51142, heterotrophically grown in continuous

- 942 dark. *J. Phycol.* **36**, 107–117 (2000).
- 943 84. Delorge, I., Figueroa, C. M., Feil, R., Lunn, J. E. & Van Dijck, P. Trehalose-6-phosphate synthase 1 is  
944 not the only active TPS in *Arabidopsis thaliana*. *Biochem. J.* **466**, 283–290 (2015).
- 945 85. Tian, L. *et al.* The trehalose-6-phosphate synthase TPS5 negatively regulates ABA signaling in  
946 *Arabidopsis thaliana*. *Plant Cell Rep.* **38**, 869–882 (2019).
- 947 86. Suzuki, N., Bajad, S., Shuman, J., Shulaev, V. & Mittler, R. The Transcriptional Co-activator MBF1c Is  
948 a Key Regulator of Thermotolerance in *Arabidopsis thaliana*. *J. Biol. Chem.* **283**, 9269–9275 (2008).
- 949 87. Wang, X., Du, Y. & Yu, D. Trehalose phosphate synthase 5-dependent trehalose metabolism modulates  
950 basal defense responses in *Arabidopsis thaliana*. *J. Integr. Plant Biol.* **61**, 509–527 (2019).
- 951 88. V, S. *et al.* TREHALOSE PHOSPHATE SYNTHASE11-dependent trehalose metabolism promotes  
952 *Arabidopsis thaliana* defense against the phloem-feeding insect *Myzus persicae*. *Plant J.* **67**, 94–104  
953 (2011).
- 954 89. Vishal, B., Krishnamurthy, P., Ramamoorthy, R. & Kumar, P. P. OsTPS8 controls yield-related traits  
955 and confers salt stress tolerance in rice by enhancing suberin deposition. *New Phytol.* **221**, 1369–1386  
956 (2019).
- 957 90. Liu, X. *et al.* Overexpression of the wheat trehalose 6-phosphate synthase 11 gene enhances cold  
958 tolerance in *Arabidopsis thaliana*. *Gene* **710**, 210–217 (2019).
- 959 91. Bolger, A. M., Lohse, M. & Usadel, B. Trimmomatic: A flexible trimmer for Illumina sequence data.  
960 *Bioinformatics* **30**, (2014).
- 961 92. Kim, D., Paggi, J. M., Park, C., Bennett, C. & Salzberg, S. L. Graph-based genome alignment and  
962 genotyping with HISAT2 and HISAT-genotype. *Nat. Biotechnol.* **37**, (2019).
- 963 93. Pertea, M., Kim, D., Pertea, G. M., Leek, J. T. & Salzberg, S. L. Transcript-level expression analysis of  
964 RNA-seq experiments with HISAT, StringTie and Ballgown. *Nat. Protoc.* **11**, (2016).
- 965 94. Gardiner, L. J. *et al.* Interpreting machine learning models to investigate circadian regulation and  
966 facilitate exploration of clock function. *Proc. Natl. Acad. Sci. U. S. A.* **118**, 2021 (2021).
- 967 95. Zhang, H. *et al.* A Comprehensive Online Database for Exploring &#x22c5;20,000 Public  
968 *Arabidopsis* RNA-Seq Libraries. *Mol. Plant* **13**, 1231–1233 (2020).
- 969 96. Eddy, S. R. Accelerated Profile HMM Searches. *PLOS Comput. Biol.* **7**, e1002195 (2011).
- 970 97. Stamatakis, A. RAxML version 8: a tool for phylogenetic analysis and post-analysis of large  
971 phylogenies. *Bioinformatics* **30**, 1312–1313 (2014).
- 972 98. Letunic, I. & Bork, P. Interactive tree of life (iTOL) v3: an online tool for the display and annotation of  
973 phylogenetic and other trees. *Nucleic Acids Res.* **44**, W242–W245 (2016).
- 974 99. Smedley, D. *et al.* BioMart – biological queries made easy. *BMC Genomics* **2009 101** **10**, 1–12 (2009).
- 975 100. Kim, J. A. *et al.* Transcriptome analysis of diurnal gene expression in Chinese cabbage. *Genes (Basel)*.  
976 **10**, (2019).
- 977 101. Yang, Y., Li, Y., Sancar, A. & Oztas, O. The circadian clock shapes the *Arabidopsis* transcriptome by  
978 regulating alternative splicing and alternative polyadenylation. *J. Biol. Chem.* **295**, 7608–7619 (2020).
- 979 102. Wu, G., Anafi, R. C., Hughes, M. E., Kornacker, K. & Hogenesch, J. B. MetaCycle: an integrated R  
980 package to evaluate periodicity in large scale data. *Bioinformatics* **32**, 3351–3353 (2016).
- 981 103. Agostinelli, C. & Lund, U. R package ‘circular’: Circular Statistics. (2017).

- 982 104. Zielinski, T., Moore, A. M., Troup, E., Halliday, K. J. & Millar, A. J. Strengths and Limitations of  
983 Period Estimation Methods for Circadian Data. *PLoS One* **9**, e96462 (2014).
- 984 105. Alexa, A. & Rahnenfuhrer, J. topGO: Enrichment Analysis for Gene Ontology. R package version  
985 2.44.0. *Alexa* (2021).
- 986 106. De Vega, J. J. *et al.* Differential expression of starch and sucrose metabolic genes linked to varying  
987 biomass yield in Miscanthus hybrids. *Biotechnol. Biofuels* **14**, 98 (2021).
- 988 107. O'Malley, R. C. *et al.* Cistrome and Epicistrome Features Shape the Regulatory DNA Landscape. *Cell*  
989 **165**, (2016).
- 990 108. Marcussen, T. *et al.* Ancient hybridizations among the ancestral genomes of bread wheat. *Science* (80-  
991 ). **345**, 6194 (2014).
- 992 109. Zeeman, S. C., Smith, S. M. & Smith, A. M. The diurnal metabolism of leaf starch. *Biochem. J.* **401**,  
993 13–28 (2007).
- 994 110. López-González, C., Juárez-Colunga, S., Morales-Elías, N. C. & Tiessen, A. Exploring regulatory  
995 networks in plants: Transcription factors of starch metabolism. *PeerJ* **2019**, e6841 (2019).
- 996 111. Skryhan, K., Gurrieri, L., Sparla, F., Trost, P. & Blennow, A. Redox regulation of starch metabolism.  
997 *Front. Plant Sci.* **9**, 1344 (2018).

998

999

1000

1001

1002 Acknowledgements

1003 H.R., R.R.P. and A.H. were funded by the BBSRC Core Strategic Programme Grant  
1004 (Genomes to Food Security) BB/CSP1720/1 and its constituent work package,  
1005 BBS/E/T/000PR9819 (WP2 Regulatory interactions and Complex Phenotypes). B.W., R.R.P.  
1006 and A.H. was supported by the BBSRC Designing Future Wheat grant BB/P016855/1;  
1007 BBS/E/T/000PR9783 (DFW WP4 Data Access and Analysis). C.R. by a BBSRC grant  
1008 BB/V509267/1 and Wave 1 of The UKRI Strategic Priorities Fund under the EPSRC Grant  
1009 EP/T001569/1, particularly the “AI for Science” theme within that grant & The Alan Turing  
1010 Institute. J.C. by the BBSRC funded Norwich Research Park Biosciences Doctoral Training  
1011 Partnership grant BB/M011216/1. We would also like to acknowledge BBS/E/T/000PR9816  
1012 (NC1 - Supporting EI’s ISPs and the UK Community with Genomics and Single Cell  
1013 Analysis) for data generation and BB/CCG1720/1 for the physical HPC infrastructure and  
1014 data centre delivered via the NBI Computing infrastructure for Science (CiS) group. P.B. was  
1015 supported by a BBSRC TRDF grant BB/N023145/1. A.N.D., L.L.B.D. and C.A.G. are  
1016 funded by BBSRC ISP Genes in the Environment (BB/P013511/1). C.A.G. was also funded  
1017 by UK BBSRC SWBIO DTP (BB/M009122/1). We thank Dr. Susan Duncan for her  
1018 contribution to preliminary experiments prior to the start of this project.

1019

1020

1021 Author contributions

1022 H.R. and A.H. were involved with project concept and designed experiments. H.R. performed  
1023 time-course experiments. R.R.P. processed data, quantified read counts and conducted  
1024 clustering of rhythmic transcripts. P.B. conducted the phylogenetic analysis of core circadian  
1025 protein families. J.C. conducted the cross-correlation analysis. C.R. processed previously  
1026 published circadian datasets. S.J.W produced loom plots for circadian triad balance. H.R.,  
1027 L.L.B.D., C.A.G., B.W., R.R.P. A.H., and A.N.D. analysed and interpreted the RNA-seq  
1028 data. H.R. wrote the initial manuscript and all authors contributed to subsequent drafts.

1029

1030 Corresponding author

1031 Correspondence to Anthony Hall.

1032

1033 Ethics declarations

1034 Competing interests: The authors declare no competing interests.

1035 Main Figures and Tables

1036 *[Figures are provided as separate files]*



1037 **Fig. 1. Circadian regulation of homoeolog expression of wheat triads.**

1038 **a**, Schematic of the origins of hexaploid wheat, showing circadian clocks evolving  
1039 independently in the ancestors of the A, B and D subgenomes following divergence from a  
1040 common ancestor approximately 6.5 million years ago. Colours of clock icons represent  
1041 theoretical differences in clock regulation integrated in the tetraploid and hexaploid hybrids  
1042 either through circadian balance or through dominance of a particular homoeolog copy.  
1043 Speciation and hybridisation event dates are based on estimates from<sup>108</sup>. **b**, Density plot  
1044 showing the distribution of period lengths across rhythmic transcripts (BH  $q < 0.01$ ) in  
1045 *Arabidopsis*, *Brassica rapa*, *Brachypodium distachyon*, *Glycine max* (Soybean) and wheat  
1046 based on meta2d estimates on 24-68h data following transfer to constant light. **c**, Histogram  
1047 showing distribution of period lengths in wheat split between the A, B and D subgenomes.  
1048 Dotted line indicates the mean period for the A, B and D subgenomes. **d**, Proportions of triads  
1049 with either zero (red segment), one (green segment), two (blue segment) or three (purple  
1050 segment) rhythmic gene(s) out of the 16,359 expressed triads in this dataset. Lighter shading  
1051 in the outer segments represents cases where one/two homeolog(s) have high confidence  
1052 rhythmicity (BH  $q < 0.01$ ) alongside an arrhythmic homeolog (BH  $q > 0.05$ ). We term these  
1053 genes “imbalanced rhythmicity” triads. Of the 3448 triads with three rhythmic genes  
1054 (represented by the purple segment in d), we also looked for triads with circadian imbalance  
1055 in: phase (**e**), period (**f**) or relative amplitude (**g**). 464 triads had homoeologs which peaked  
1056 with an optimum lag of 4, 8 or 12h following cross-correlation analysis. 1,139 triads had  
1057 homoeologs with period differences of more than 2h. 701 triads had homoeologs with a more  
1058 than two-fold difference in relative amplitude. **h,i**, Example triads for imbalanced rhythmicity,  
1059 where either one or two homoeologs are rhythmic respectively. **j**, Example triad where the D  
1060 genome homeolog lags by 8h. **k**, Example of a triad where the A genome homoeolog has a  
1061 period estimate 4h longer than the D genome homoeolog. **l**, Example triad where the relative  
1062 amplitude of the D-genome homoeolog is more than four times that of the A-genome  
1063 homoeolog. **m**, The rhythmicity of all three homoeologs in **l**, is evident when the expression is  
1064 mean normalized. **n**, Mean expression of transcripts across all timepoints in the A, B and D  
1065 subgenomes within imbalanced rhythmicity triads compared with circadian balanced and  
1066 arrhythmic triads. Error bars represent standard error.

1067 Circadian statistics are meta2d estimates from data 0-68h after transfer to L:L. Data represent  
1068 the mean of three biological replicates with transcript expression collapsed to gene level. Genes  
1069 in example triads are: [Triad 1664: TraesCS3A02G177600, TraesCS3B02G207400,  
1070 TraesCS3D02G183200], [Triad 408: TraesCS3A02G533700, TraesCS3B02G610500,  
1071 TraesCS3D02G539000], [Triad 13405: TraesCS6A02G269100, TraesCS6B02G296400,  
1072 TraesCS6D02G245800], [Triad 10854: TraesCS6A02G166500, TraesCS6B02G194000,  
1073 TraesCS6D02G155100] and [Triad 2454: TraesCS2A02G3333000, TraesCS2B02G348800,  
1074 TraesCS2D02G329900].

1075

1076

1077

1078 **Fig. 2. Overlapping GO-slim terms shared between *Arabidopsis* and wheat modules**  
1079 **expressed at similar times in the day**

1080 **a**, Pearson correlation coefficient ( $r$ ) between eigengenes for wheat and *Arabidopsis* expression  
1081 modules ordered by circadian phase. Coloured triangles and axes labels correspond to module  
1082 expression profiles and columns in bubble-plot. **b-e**, Expression profiles of *Arabidopsis* and  
1083 wheat modules compared in the main text normalised to their mean. Solid and dashed black  
1084 lines represent the module eigengene for wheat and *Arabidopsis* modules respectively. **f**, GO-  
1085 slim terms associated with *Arabidopsis* and Wheat modules. Modules are ordered by predicted  
1086 CT phase for each species. Only terms with  $-\text{Log}_{10}p > 3$  are shown. Wheat W6 and *Arabidopsis*  
1087 A4 contained no terms above the significance cut-off and so are not shown. Bubble color  
1088 indicates the  $-\text{Log}_{10}p$ -value significance from Fisher's exact test and size indicates the  
1089 frequency of the GO-slim term in the underlying EBI Gene Ontology Annotation database  
1090 (larger bubbles indicate more general terms).

1091

1092

1093 **Fig. 3. Free-running expression of core circadian clock genes in wheat and their homologs**  
1094 **in *Arabidopsis*.** **a-l**, Wheat circadian clock genes were identified through alignment of  
1095 phylogenetic protein family trees or BLASTP to known clock gene homologs. Gene IDs for  
1096 each gene set are in Supplementary Table 8. Wheat homoeologs are coloured according to their  
1097 identity to either the A genome (orange), B genome (yellow) or D genome (blue) and grey and  
1098 white blocks indicate subjective dark and light time periods under constant conditions. Data  
1099 represent the mean of three biological replicates and transcript expression is collapsed to gene  
1100 level. Expression profiles for additional core circadian clock genes are in Supplementary Fig.  
1101 17. **m**, phases of core clock genes in *Arabidopsis* and wheat (meta2d estimates from data 24-  
1102 68h after transfer to L:L). Genes were not plotted if B.H  $q$ -values were  $> 0.01$ . Wheat values  
1103 represent circular mean circadian phases (CT) across homoeologs calculated in Supplementary  
1104 Table 9.  
1105

1106 **Fig. 4. Similarities and differences in circadian control of transcript accumulation in key**  
1107 **genes involved in primary metabolism and signalling.** Circles represent metabolites  
1108 involved in the breakdown and biosynthesis of starch. Starch synthesis occurs during the day  
1109 and breakdown occurs at night as indicated by the yellow to grey shading gradient. The dotted  
1110 line encloses processes which take place in the chloroplast. Abbreviations: HP: Hexose-  
1111 phosphate, T6P: Trehalose-6-phosphate, TP: Triose phosphate, 3-PGA: Glycerate 3-  
1112 phosphate, Fru6P: Fructose-6-phosphate, Glc6P: Glucose-6-phosphate, Glc1P: Glucose-1-  
1113 phosphate, ATP: Adenosine tri phosphate, ADP-Glc: ADP-glucose, TPS: Trehalose phosphate  
1114 synthase, TPP: Trehalose phosphate phosphatase, PGK1: Phosphoglycerate kinase 1, PGI1:  
1115 Glucose-6-phosphate isomerase, PGM1: Phosphoglucomutase-1, PHS1 and 2: ALPHA-  
1116 GLUCAN PHOSPHORYLASE 1 and 2, AGPase: ADP-Glc pyrophosphorylase, BAM1,3,5:  
1117  $\beta$ -amylase 1,3,5, ISA1,2,3: Isoamylase 1,2,3, DPE1,2: Disproportionating enzyme1 and 2,  
1118 SBEI,II: Starch branching enzyme I, II, PU1: Pullulanase 1, PWD: Phosphoglucan, water  
1119 dikinase, GWD:  $\alpha$ -glucan, water dikinase, SEX4: starch excess 4, AMY3:  $\alpha$ -amylase, GBSS:  
1120 Granule bound Starch synthase, SSI-IV: Starch synthase I-IV. Pathway references:<sup>109–111</sup>.  
1121

1122 **Table 1: Numbers of rhythmic genes at (BH  $q < 0.05$  or BH  $q < 0.01$ ) in *Arabidopsis* and**  
 1123 **wheat identified using Metacycle Benjamini Hochberg  $q$ -values.** Periods, relative  
 1124 amplitudes, and  $q$ -values are estimates from meta2d. Data windows reflect hours relative to  
 1125 transfer to constant light from entrained 12:12h light conditions. A repeat of this table with  
 1126 pre-filtering to remove low-expression genes is provided in Supplementary Figure 1, and the  
 1127 effects on proportions of rhythmic genes are discussed in Supplementary Note 1.  
 1128

|                                          | Wheat data from this study |                  | <i>Arabidopsis</i> data from Romanowski et al. |
|------------------------------------------|----------------------------|------------------|------------------------------------------------|
|                                          | 24-68 data window          | 0-68 data window | 24-68 data window                              |
| Total number of expressed genes          | 86,567                     | 86,567           | 26,392                                         |
| Total rhythmic genes (BH $q < 0.05$ )    | 28,594                     | 28,530           | 13,392                                         |
| Total rhythmic genes (BH $q < 0.01$ )    | 18,633                     | 21,059           | 10,317                                         |
| Mean Period (h) (BH $q < 0.05$ )         | 26.60h (SD 3.62)           | 26.75h (SD 2.82) | 23.50 (SD 2.52)                                |
| Mean Period (h) (BH $q < 0.01$ )         | 26.82h (SD 3.21)           | 26.83h (SD 2.42) | 23.62 (SD 2.04)                                |
| Mean relative Amplitude (BH $q < 0.05$ ) | 0.24 (SD 0.19)             | 0.26 (SD 0.20)   | 0.28 (SD 0.20)                                 |
| Mean relative Amplitude (BH $q < 0.01$ ) | 0.27 (SD 0.19)             | 0.29 (SD 0.21)   | 0.30 (SD 0.20)                                 |

1129 **Table 2: GO-slim terms for biological processes associated with circadian balanced,**  
 1130 **circadian imbalanced, and arrhythmic wheat triads.** Only enriched terms which were  
 1131 highly enriched (Fisher's exact test  $p < 0.01$ ) in one category and non-significantly expressed  
 1132 ( $p > 0.05$ ) in other categories is displayed.

|                             | GO ID                            | Terms                                          | <i>p</i> -value<br>in<br>circadian<br>balance<br>d triads | <i>p</i> -value in<br>circadian<br>imbalance<br>d triads | <i>p</i> -value<br>in non-<br>rhythmic<br>c triads |
|-----------------------------|----------------------------------|------------------------------------------------|-----------------------------------------------------------|----------------------------------------------------------|----------------------------------------------------|
| CIRCADIAN<br>BALANCED       | GO:0009628                       | response to abiotic stimulus                   | 0.00                                                      | 0.22                                                     | 0.58                                               |
|                             | GO:0015979                       | photosynthesis                                 | 0.00                                                      | 1.00                                                     | 1.00                                               |
|                             | GO:0006091                       | generation of precursor metabolites and energy | 0.00                                                      | 1.00                                                     | 1.00                                               |
|                             | GO:0006518                       | peptide metabolic process                      | 0.00                                                      | 1.00                                                     | 0.92                                               |
|                             | GO:1901566                       | organonitrogen compound biosynthetic process   | 0.00                                                      | 1.00                                                     | 0.92                                               |
|                             | GO:0009059                       | macromolecule biosynthetic process             | 0.00                                                      | 1.00                                                     | 0.99                                               |
|                             | GO:0006412                       | translation                                    | 0.00                                                      | 1.00                                                     | 0.98                                               |
|                             | GO:0034645                       | cellular macromolecule biosynthetic process    | 0.00                                                      | 1.00                                                     | 1.00                                               |
|                             | GO:0010467                       | gene expression                                | 0.00                                                      | 1.00                                                     | 0.90                                               |
|                             | GO:0019725                       | cellular homeostasis                           | 0.00                                                      | 0.54                                                     | 0.96                                               |
| GO:0065008                  | regulation of biological quality | 0.00                                           | 0.71                                                      | 1.00                                                     |                                                    |
| CIRCADIAN<br>IMBALANCE<br>D | GO:0003006                       | developmental process involved in reproduction | 0.85                                                      | 0.00                                                     | 0.87                                               |
|                             | GO:0090567                       | reproductive shoot system development          | 0.92                                                      | 0.01                                                     | 1.00                                               |
|                             | GO:0009719                       | response to endogenous stimulus                | 0.97                                                      | 0.01                                                     | 0.10                                               |
|                             | GO:0048731                       | system development                             | 0.98                                                      | 0.00                                                     | 0.97                                               |
|                             | GO:0048608                       | reproductive structure development             | 0.98                                                      | 0.00                                                     | 0.97                                               |
|                             | GO:0043412                       | macromolecule modification                     | 1.00                                                      | 0.00                                                     | 0.28                                               |
| NON-<br>RHYTHMIC            | GO:0022414                       | reproductive process                           | 1.00                                                      | 0.00                                                     | 0.47                                               |
|                             | GO:0044237                       | cellular metabolic process                     | 0.08                                                      | 1.00                                                     | 0.00                                               |
|                             | GO:0009605                       | response to external stimulus                  | 0.41                                                      | 0.39                                                     | 0.00                                               |
|                             | GO:0009607                       | response to biotic stimulus                    | 0.58                                                      | 0.60                                                     | 0.01                                               |
|                             | GO:0060255                       | regulation of macromolecule metabolic process  | 0.60                                                      | 0.76                                                     | 0.00                                               |
| GO:0009056                  | catabolic process                | 0.65                                           | 0.93                                                      | 0.00                                                     |                                                    |



|            |                                     |      |      |      |
|------------|-------------------------------------|------|------|------|
| GO:0048869 | cellular developmental process      | 0.71 | 0.19 | 0.00 |
| GO:0019222 | regulation of metabolic process     | 0.78 | 0.85 | 0.00 |
| GO:0044238 | primary metabolic process           | 0.81 | 0.24 | 0.00 |
| GO:0071704 | organic substance metabolic process | 0.81 | 0.26 | 0.00 |
| GO:0008219 | cell death                          | 0.82 | 0.94 | 0.00 |
| GO:0010468 | regulation of gene expression       | 0.88 | 0.15 | 0.00 |
| GO:0009790 | embryo development                  | 0.95 | 0.98 | 0.00 |
| GO:0007049 | cell cycle                          | 0.97 | 1.00 | 0.00 |
| GO:0065009 | regulation of molecular function    | 1.00 | 1.00 | 0.00 |
| GO:0006807 | nitrogen compound metabolic process | 1.00 | 1.00 | 0.00 |

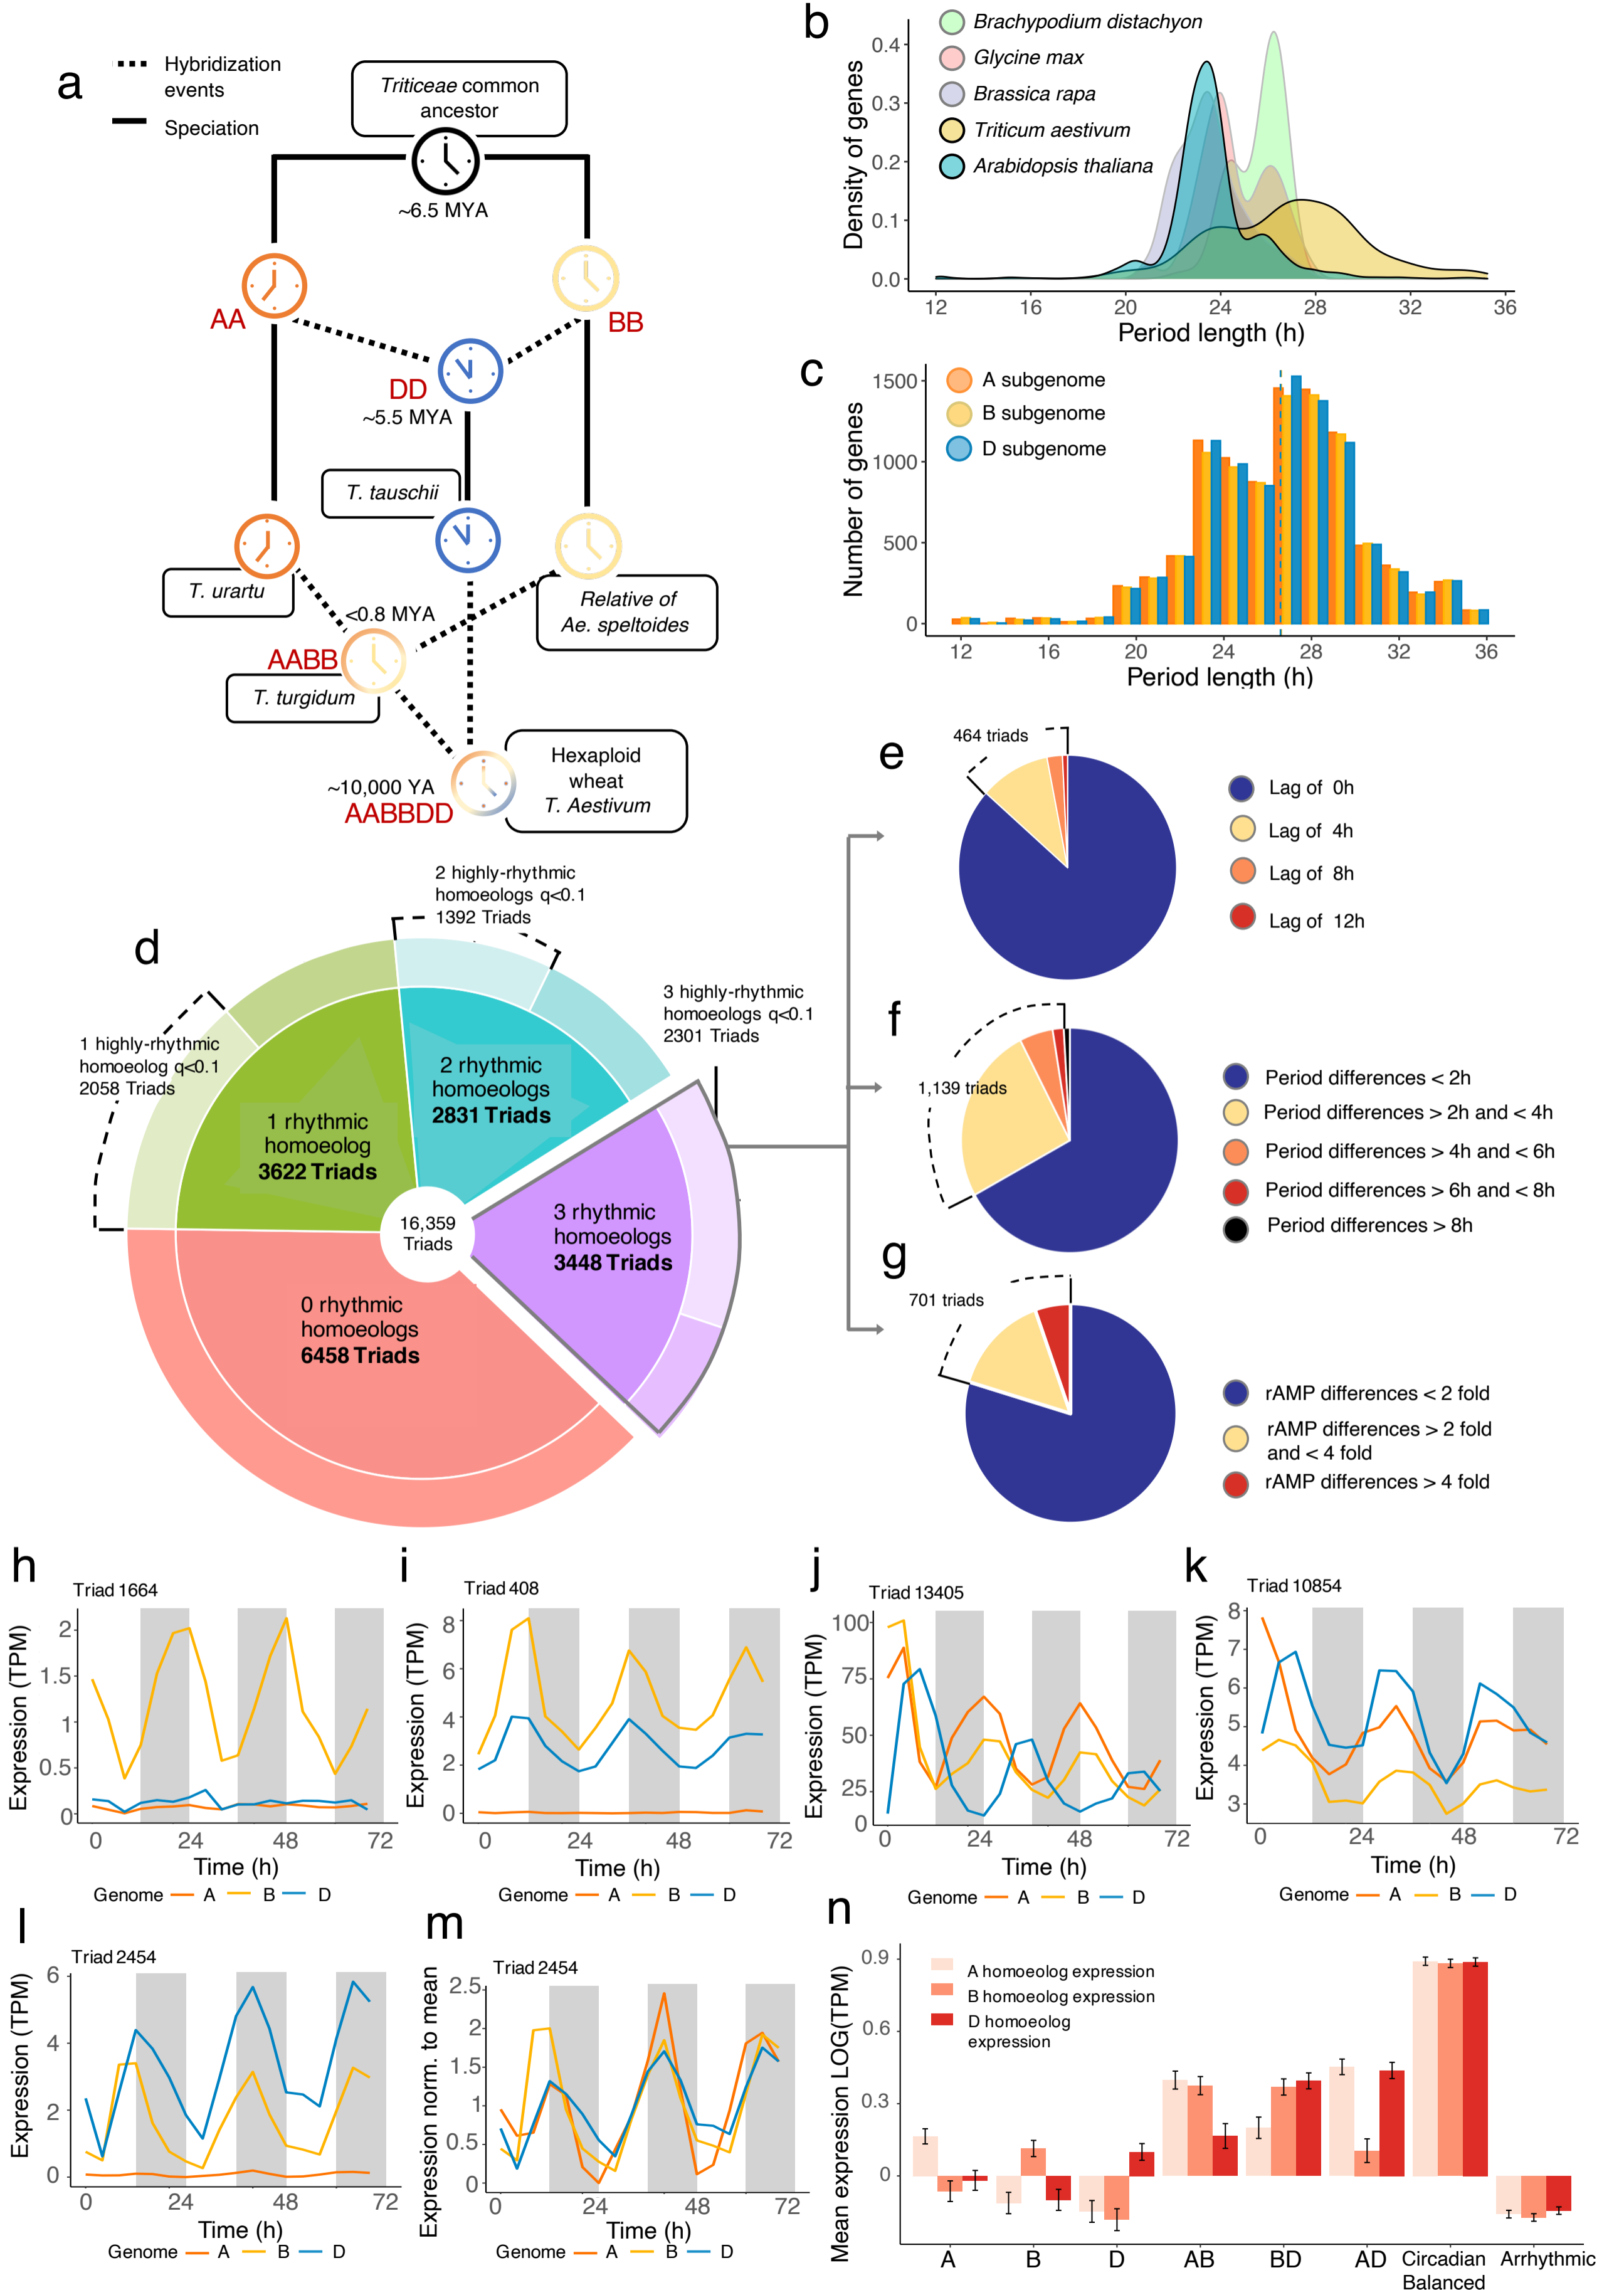

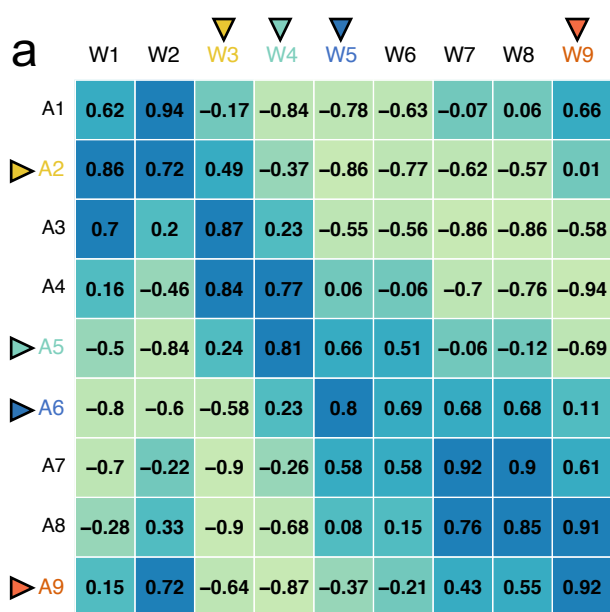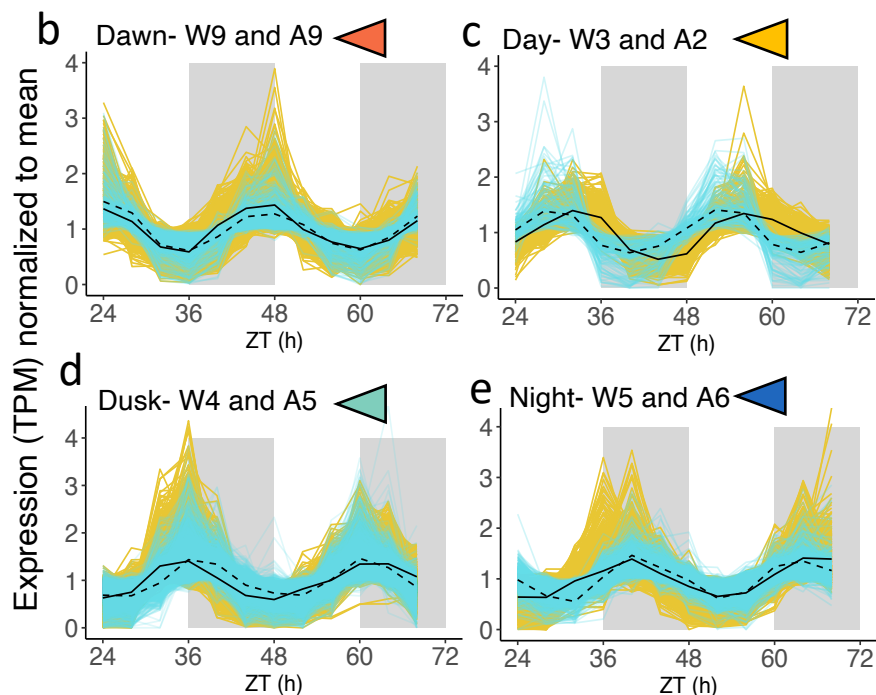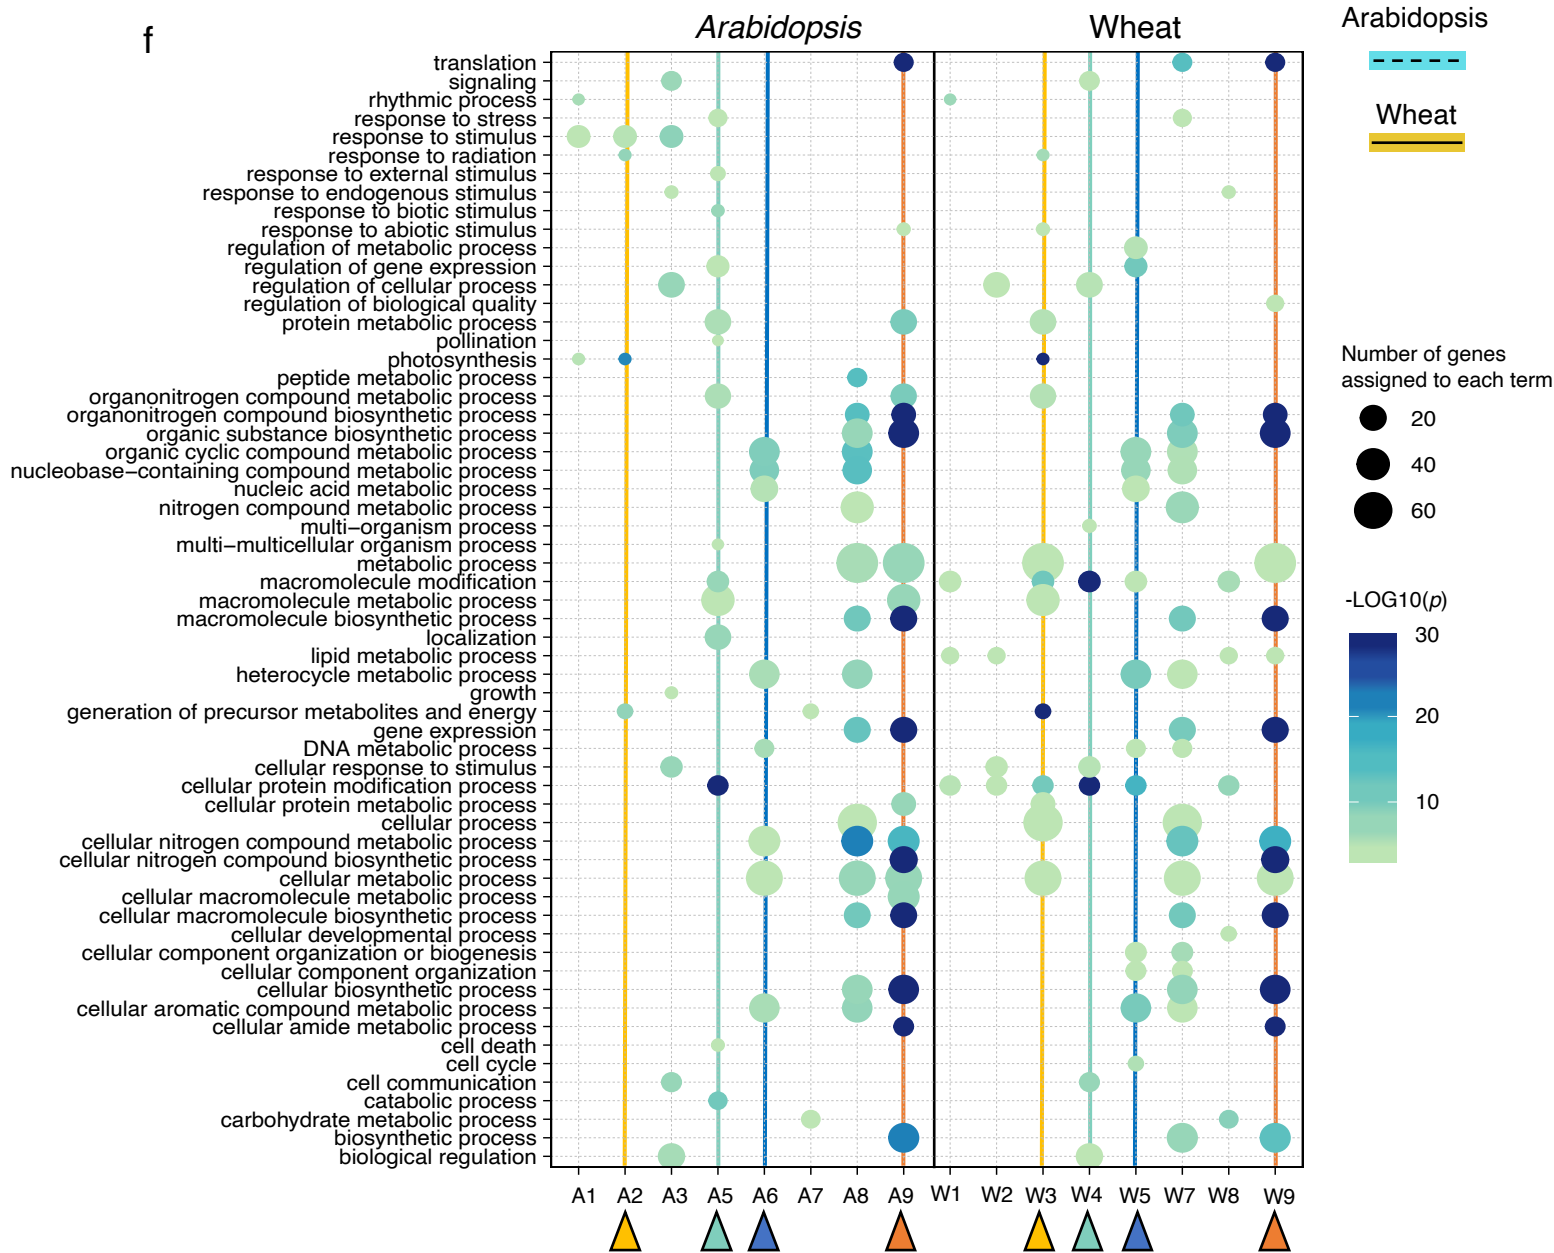

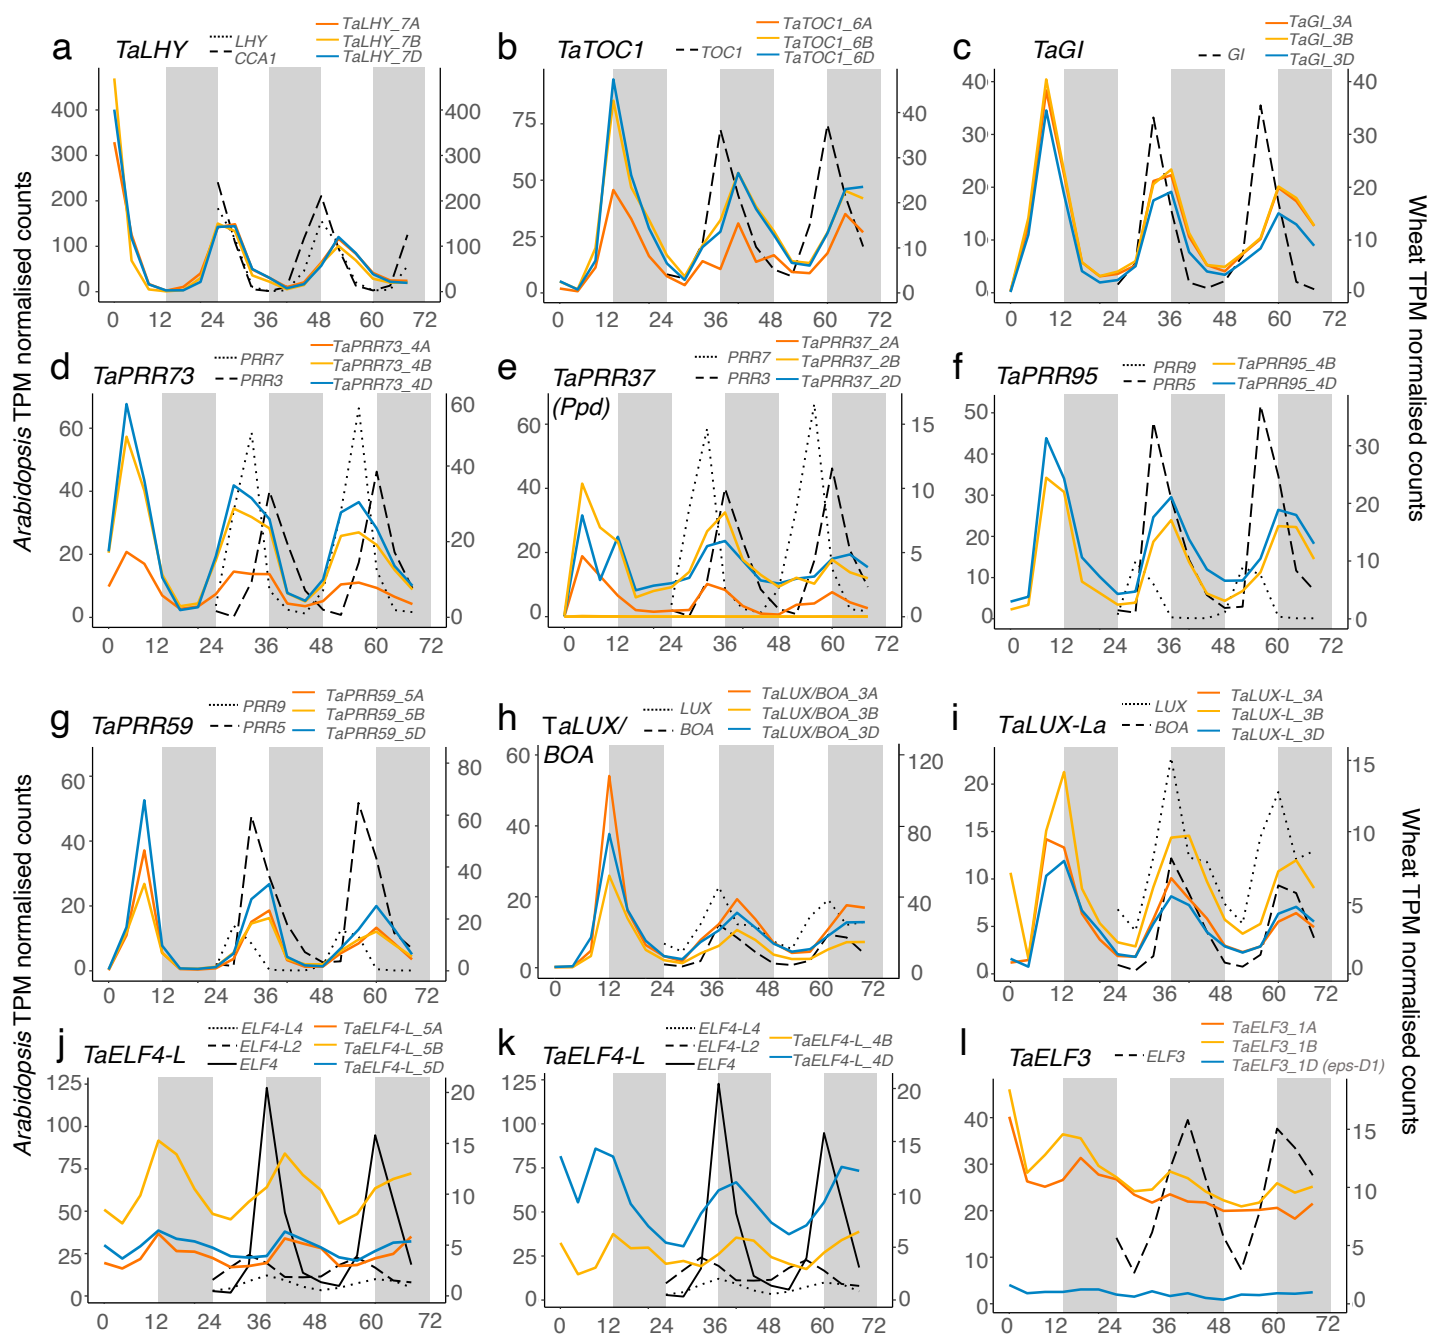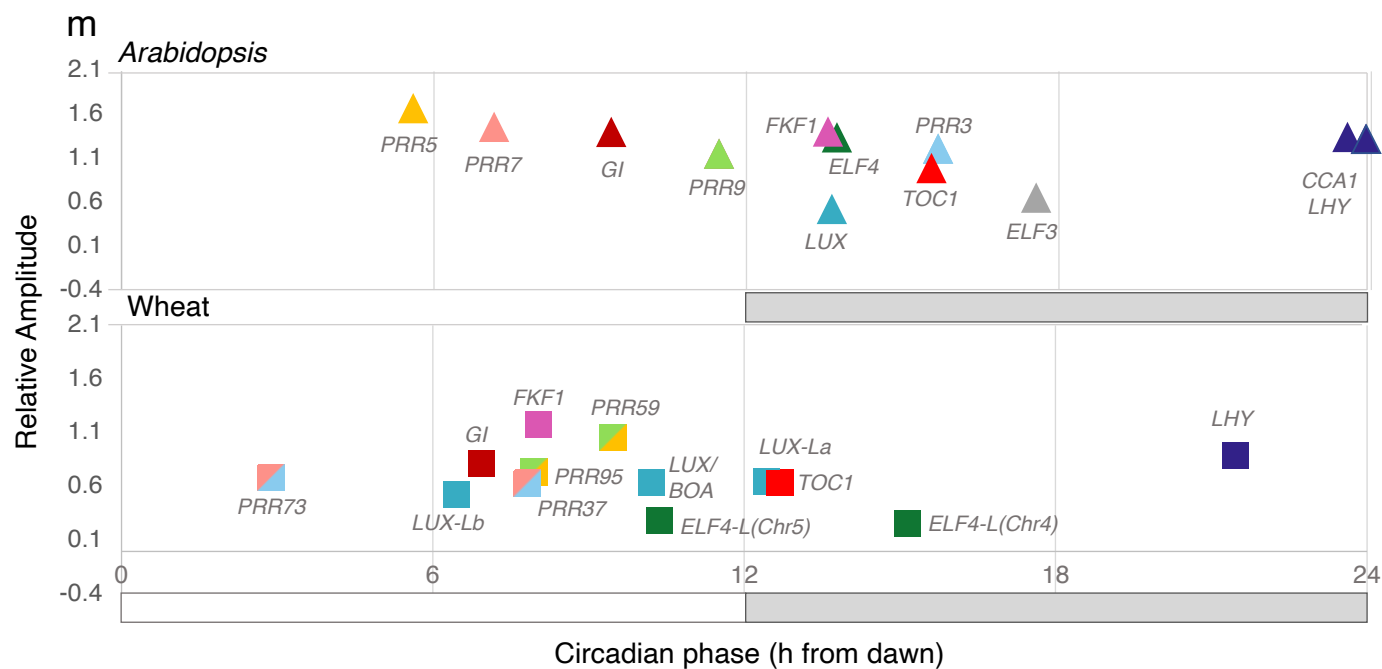

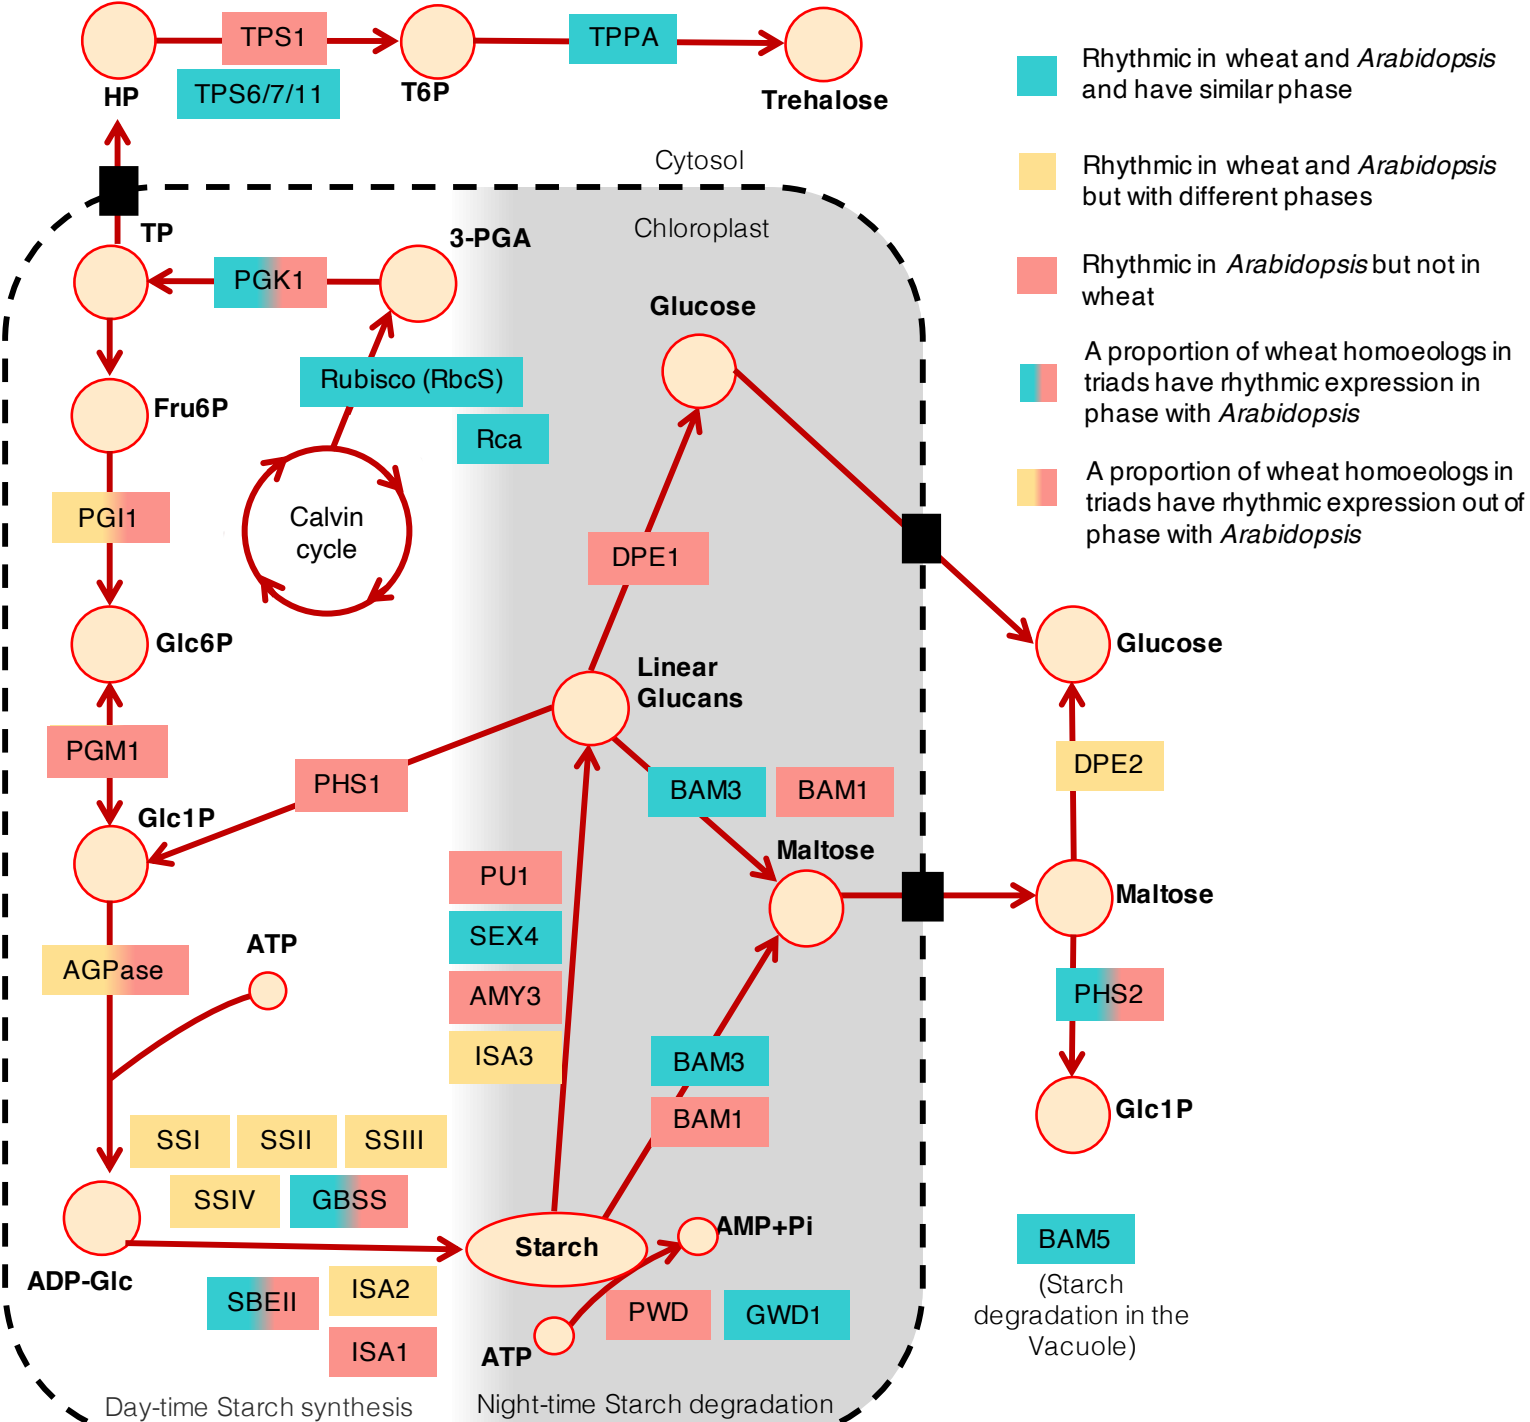

Source: http://biorxiv.org/content/10.1101/2021.09.30.462369v2.full.pdf
