1 Circadian regulation of the transcriptome in a complex polyploid crop

2

3 Hannah Rees<sup>1</sup>, Rachel Rusholme-Pilcher<sup>1</sup>, Paul Bailey<sup>2</sup>, Joshua Colmer<sup>1</sup>, Benjamin White<sup>1</sup>,

4 Connor Reynolds<sup>1</sup>, Calum A. Graham<sup>3,4</sup>, Luíza Lane de Barros Dantas<sup>3</sup>, Antony N. Dodd<sup>3</sup>,

5 Anthony Hall<sup>1</sup>

6

7

8 <sup>1</sup> Earlham Institute, Norwich Research Park, Norwich, NR4 7UZ, UK

9 <sup>2</sup> Royal Botanic Gardens Kew, Richmond, Surrey, TW9 3AE, UK

10 <sup>3</sup> John Innes Centre, Norwich Research Park, Norwich, NR4 7UH, UK

11 <sup>4</sup> School of Biological Sciences, University of Bristol, Bristol, BS8 1TQ, UK.

12

### 13 Abstract

14 The circadian clock is a finely balanced time-keeping mechanism that coordinates  
15 programmes of gene expression. In polyploids, this regulation must be coordinated over  
16 multiple subgenomes. Here, we generate and analyse a high-resolution time-course dataset to  
17 investigate the circadian balance between sets of three homoeologous genes (triads) from  
18 hexaploid bread wheat. We find a large proportion of circadian triads exhibit unbalanced  
19 rhythmic expression patterns, with no specific subgenome favoured. In wheat, period lengths  
20 of rhythmic transcripts are found to be longer and have a higher level of variance than in  
21 other plant species. Biological processes under circadian control are largely conserved  
22 between wheat and *Arabidopsis*, however striking differences are seen in agriculturally  
23 critical processes such as starch metabolism. Together, this work highlights the ongoing  
24 selection for balance versus diversification in circadian homoeologs, and identifies clock-  
25 controlled pathways that might provide important targets for future wheat breeding.

### 26 Introduction

27 Circadian clock homologs have been both inadvertently selected during crop domestication  
28 and identified as crop improvement targets<sup>1-4</sup>. Understanding circadian regulation of the  
29 transcriptome in crops such as bread wheat (*Triticum aestivum*) may provide useful insights  
30 for the future. Wheat also provides an excellent model system to explore how the circadian  
31 clock and its outputs are co-ordinated in a recently formed, complex allopolyploid. In  
32 *Arabidopsis*, circadian transcription factors act in a dose-dependent manner, with both knock-

33 out and over-expression mutants resulting in altered function of the circadian oscillator<sup>5-8</sup>. It  
34 is not yet understood how rhythmic gene expression is balanced in species with multiple  
35 copies of the same gene. *T. aestivum* is a hexaploid (AABBDD) formed through interspecific  
36 hybridisation of three diploid ancestors around 10,000 years ago<sup>9,10</sup>. 51.7% of high-  
37 confidence wheat genes still exist in triads; sets of three homoeologous genes present on each  
38 of the A, B and D genomes<sup>11</sup>. As these homoeologs evolved independently for several  
39 million years prior to hybridization, it is plausible that these independent species might have  
40 been subject to different selective pressures on their clocks (Fig. 1a).

41 The circadian network in *Arabidopsis* comprises a series of interlocking negative  
42 transcriptional feedback loops connected by key activators<sup>12</sup>. Although monocots such as  
43 wheat diverged from their dicot relatives over 140 million years ago<sup>13</sup>, many circadian  
44 oscillator components seem to have been conserved, particularly those forming the core loop  
45 network. Orthologs of *TIMING OF CAB EXPRESSION 1 (TOC1)* and other PSEUDO-  
46 RESPONSE REGULATOR (PRR) genes have been identified in wheat, rice and barley, and  
47 several loci within these genes have been associated with altered flowering times, most  
48 notably (*ppd-1*) within *TaPRR3/7*<sup>14-16</sup>. Likewise, mutants of orthologs of *LATE*  
49 *ELONGATED HYPOCOTYL (LHY)*, *GIGANTEA (GI)*, *EARLY FLOWERING 3 (ELF3)*, and  
50 *LUX ARRHYTHMO (LUX)* have been identified that alter heading dates, pathogen  
51 susceptibility, plant height or lower grain yields<sup>17-21</sup>.

52 Circadian control of carbon fixation and starch metabolism are thought to form part of the  
53 selective advantage conferred by the clock<sup>22,23</sup>. This is apparent in the short-period *lhy/cca1*  
54 double mutant, where night-time starch levels reach exhaustion earlier compared to wild-  
55 type, triggering early onset starvation responses that reduce plant productivity<sup>23</sup>. Similarly,  
56 genes encoding photosynthesis-related proteins are well-established targets of the circadian  
57 clock and include the *LIGHT HARVESTING CHLOROPHYLL A/B BINDING PROTEIN*  
58 genes (*LHCB* also known as *CAB* genes) and photosystem I and II reaction centre genes<sup>24,25</sup>.  
59 Here, we investigate circadian balance within wheat triads to understand how circadian  
60 control is co-ordinated in a polyploid crop with three subgenomes. Second, we examine  
61 similarities and differences between the circadian transcriptome in wheat and its distant dicot  
62 relative, *Arabidopsis*, at a global level and at the level of genes encoding key pathways such  
63 as primary metabolism and photosynthesis.

## 64 Results

### 65 Global analysis of the circadian transcriptome in wheat

66 We generated a circadian RNA-seq time-course and compared it with a recently published  
67 dataset from *Arabidopsis*<sup>26</sup> over 24h - 68h following transfer to constant light. Rhythmicity  
68 was assessed using Metacycle Benjamini-Hochberg (BH)  $q$ -values. Of the 86,567 genes  
69 expressed in wheat, 33.0% were rhythmically expressed with a BH  $q < 0.05$  and 21.5% with  
70 a BH  $q < 0.01$  (Supplementary Note 1, Supplementary Table 1). This was significantly lower  
71 than the proportions of rhythmically expressed genes in the *Arabidopsis* dataset (50.7% BH  $q$   
72  $< 0.05$ , 39.1% BH  $q < 0.01$ ) using the same criteria ( $X^2(1) = 2727.1$ ,  $p < 0.001$ , one-tailed,  
73 two-proportions z-test). Circadian waveform characteristics of the rhythmically expressed  
74 genes (BH  $q < 0.01$ ) in the wheat and *Arabidopsis* datasets were quantified using algorithms  
75 in Metacycle (JTK, ARSER, LS and meta2d) and Biodare2 (FFT-NLLS and MESA). Period,  
76 phase, and amplitude estimates from FFT-NLLS and meta2d were well-correlated for  
77 individual genes (Supplementary Fig. 1). All models reported that mean period length in  
78 wheat was approximately 3h longer than in *Arabidopsis* (wheat = 25.9 - 27.5h,  
79 *Arabidopsis* = 22.6 - 24.4h;  $t(36067) = 101.58$ ,  $p < 0.001$ , Welch's two sample t-test;  
80 Supplementary Fig. 2). There was no significant difference between mean periods across the  
81 three wheat sub-genomes (Fig. 1c,  $F(2, 28,276) = 0.179$ ,  $p = 0.836$ , One-way ANOVA).  
82 We used meta2d to compare period means and distributions from four previously published  
83 circadian datasets, and found that period lengths in wheat were longer and had higher  
84 standard deviation than period distributions from *Arabidopsis*, *Brassica rapa*, *Brachypodium*  
85 *distachyon* and *Glycine max* (Fig 1b; Supplementary Table 2).  
86 We investigated how wheat periods changed over the course of the three-day experiment and  
87 found that periods were longer immediately after transfer to constant light (28.61h,  
88 SD=3.421h), and progressively shortened over the following days (Supplementary Note 2).  
89 For both *Arabidopsis* and wheat, we recalculated phases of rhythmic transcripts relative to  
90 endogenous period (circadian time; CT). Across all algorithms, most transcripts in  
91 *Arabidopsis* peaked during the subjective night (around CT12-24; Supplementary Fig. 3). In  
92 wheat, the greatest numbers of rhythmic genes peaked during the subjective day (around  
93 CT6-8) with a second, smaller group being expressed in the night (~CT20). When we  
94 grouped transcripts into 2h period bins, we found that transcripts with short periods contained

95 proportionally more dawn-peaking transcripts, whereas those with longer periods contained  
96 proportionally more dusk-peaking transcripts (Supplementary Note 3, Supplementary Fig. 4).

### 97 Balance of circadian regulation within triads

98 In wheat, over 72% of triads are estimated to have “balanced” expression, with similar  
99 relative abundance of transcripts from each of the three homoeologs<sup>27</sup>. Due to the importance  
100 of the clock in coordinating dosage of gene expression, our hypothesis was that many  
101 circadian triads would have balanced regulation. We defined unbalanced circadian regulation  
102 as triads harbouring differences in rhythmicity (i.e., BH  $q$ -values), period lengths, phases, and  
103 relative amplitudes.

104 Of the 16,359 expressed triads in our dataset, 9901 (60.52%) had at least one rhythmic  
105 homoeolog, and 3448 (21.08%) had three rhythmically expressed genes (BH  $q < 0.05$ ), with  
106 the latter hereafter termed “rhythmic triads” (purple segment, Fig. 1d). 6453 triads lacked  
107 rhythmicity in either one or two expressed homoeolog(s) (green and blue segments, Fig. 1d).  
108 In both cases, there was no bias for absence of rhythmicity in the A, B or D copy ( $\chi^2(2)=$   
109  $6.8415$ ,  $p = 0.40$  where one gene is arrhythmic,  $\chi^2(2)= 6.8415$ ,  $p = 0.03$  where two genes are  
110 arrhythmic). We found cases where high-confidence rhythmic homoeologs (BH  $q < 0.01$ )  
111 occurred alongside arrhythmic homoeologs (BH  $q > 0.05$ ) represented by light-shaded outer-  
112 ring segments in Fig. 1d. In total there were 3450 unbalanced-rhythmicity triads, contrary to  
113 our original expectation that most circadian regulated triads would be balanced (Fig. 1h,i). To  
114 explore other forms of circadian imbalance, we assessed whether phase, period and relative  
115 amplitude were conserved between homoeologs within the rhythmic triad set (purple  
116 segment, Fig. 1d). Differences in phases were quantified by a cross-correlation analysis to  
117 assess whether the correlation between homoeologs was improved with a time lag of 4, 8 or  
118 12 hours. We identified 464 triads with unbalanced phases with an optimum lag of  $>0$ h  
119 between homoeologs (Fig. 1e,j). 1,139 triads had unbalanced periods with more than 2h  
120 difference in period between homoeologs (Fig. 1f,k). 701 triads had unbalanced relative  
121 amplitudes with more than two-fold difference in relative amplitude (Fig. 1g,l). Within this  
122 last group, the homoeolog with the lowest amplitude was still rhythmic, as observed when  
123 data are mean-normalized (Fig. 11,m).

124 Overall, there was a total of 5,082 circadian unbalanced triads where at least one homoeolog  
125 had different circadian regulation from the other homoeologs. The largest cause of  
126 unbalanced circadian expression within triads was absence of rhythmicity (67.89%) with  
127 differences in period (22.41%), relative amplitude (13.79%) and phase (9.13%) occurring

128 more infrequently and with some overlap between categories. This compares with 1816  
129 circadian balanced triads where all three homoeologs are rhythmic and have similar, phases,  
130 periods, and amplitudes giving us a ratio of almost 3:1 for unbalanced to balanced circadian  
131 triads.

132 One potential explanation for unbalanced rhythmicity is that arrhythmic homoeologs are  
133 silenced. In support of this, we found that the rhythmic homoeologs in unbalanced triads  
134 were expressed at a significantly higher baseline level than their arrhythmic homoeologs (Fig.  
135 1n;  $F(16, 35,148) = 6.94, p < 0.001$ , Two-level, nested ANOVA on Log10 transformed data).  
136 We also found that triads with balanced rhythmicity were expressed at a uniformly higher  
137 level than the most highly expressed homoeolog(s) in the unbalanced triads (Fig. 1n;  $F(7,$   
138  $35,148) = 570.909, p < 0.001$ ). Therefore, in unbalanced rhythmicity triads, the rhythmic  
139 homoeolog does not appear to compensate for reduced expression of the other homoeolog(s),  
140 so the overall expression across the triad is reduced. This is supported by research in diploid  
141 *Brassica rapa*, which found that circadian regulated paralogs are expressed at a higher level  
142 than single copy genes<sup>28</sup>.

143 To investigate whether certain biological processes were associated with circadian balance,  
144 we compared GO-slim terms enriched in the 1816 circadian balanced triads, the 5082  
145 differently circadian regulated triads and the 6458 arrhythmic triads, identifying significant  
146 terms unique to each group (Table 2). Some terms were enriched only in circadian balanced  
147 triads ( $p$ -value  $< 0.0001$ , Fisher's exact test e.g., "photosynthesis", "generation of precursor  
148 metabolites and energy", "gene-expression" and "translation"). In contrast, GO-slim terms:  
149 "developmental process involved in reproduction", "and "system development" were  
150 significantly enriched in triads with differently regulated homoeologs ( $p$ -value  $< 0.0001$ ) but  
151 not in triads with circadian balanced homoeologs ( $p$ -value  $> 0.5$ ). A possible explanation for  
152 this enrichment could be that unbalanced circadian triads are more likely to be dynamically  
153 expressed over developmental stages or show local dominance of a subgenome in a particular  
154 tissue type.

155 Transcription factor (TF) triads were as likely to be circadian balanced/unbalanced as non-  
156 transcription factors ( $\chi^2(2, N = 13,356) = 3.03, p = 0.08$ , chi-square test). Previously  
157 validated wheat TFs with unbalanced circadian expression included *WCBF2* (aka *TaCBF1*)  
158 and *TaPCF5*, both of which regulate abiotic stress responses<sup>29,30</sup> (Supplementary Note 4,  
159 Supplementary Fig. 5).

## 160 Clustering of gene expression and GO-term enrichment

161 To establish whether similar phased transcripts in wheat and *Arabidopsis* had similar  
162 biological roles, we clustered rhythmic transcripts (BH  $q < 0.01$ ) into 9 expression modules  
163 for each species and identified GO-slim terms enriched in each module ( $p < 0.01$ ). Circadian  
164 characteristics of module eigengenes are shown in Supplementary Table 4. We compared the  
165 correlation and cross-correlation of pairwise modules in the two species to find modules that  
166 correlated with a peak lag of 0 (synchronous phase) or with a peak lag of 4, 8, or 12h  
167 (asynchronous phase). Overall, modules with synchronous phases in wheat and *Arabidopsis*  
168 shared more GO-slim terms than modules with asynchronous phases ( $F(3,77) = 4.79$ ,  $p$   
169  $< 0.01$ , One-Way ANOVA), indicating that these modules in wheat and *Arabidopsis* contain  
170 genes with similar functions (Supplementary Fig. 6). We focused on four of these  
171 synchronous module pairs, broadly peaking at dawn, midday, dusk, and night for further  
172 analysis (Fig. 2). Eigengenes for dawn peaking modules A9 and W9 were highly correlated  
173 ( $r > 0.9$ ) and shared 14 overlapping enriched GO-slim terms ( $p < 0.01$ ; Fig. 2a,b,f). These  
174 included terms for translation and gene expression as well as terms related to protein, amide,  
175 nitrogen and organonitrogen biosynthetic and metabolic processes (full lists in  
176 Supplementary Table 5). Co-expressed genes in the dawn-expressed modules included  
177 several orthologs involved in light, heat, and biological defence, as well as 45 ribosomal  
178 protein orthologs (Supplementary Note 5). Transcripts for ribosomal proteins in mouse liver  
179 have also been reported to oscillate, suggesting a conserved role for the circadian clock in co-  
180 ordinating ribosome biogenesis<sup>31</sup>.

181 In addition to enriched GO-slim terms, we investigated enrichment for transcription factor  
182 (TF) superfamilies and transcription factor binding sites in each wheat module. In late-  
183 night/dawn modules W8 and W9, transcripts encoding MYB transcription factors were  
184 significantly enriched and included putative TFs involved in leaf morphogenesis, plant  
185 growth, regulation of flavonoid biosynthesis, and developmental transition to flowering  
186 (Supplementary Note 5, Supplementary Fig. 7).

187 Eigengenes for modules peaking in the day, W3 and A2, had a relatively low correlation  
188 ( $r = 0.491$ ) but peaked with similar CT values (CT 6.34h and 6.19) given the longer period  
189 length in wheat. 5 out of 15 of the GO-slim terms enriched in the W3 module were also  
190 found in the A2 module ( $p < 0.01$ ; yellow triangles in Fig. 2a,c,f). These included terms  
191 relating to “photosynthesis”, “response to radiation” and “generation of precursor metabolites  
192 and energy”. Co-expressed genes peaking in day-time modules included light-harvesting and

193 light signalling genes as well as *CYP709B3*, which protects the plant from transpiration-  
194 triggered salinity stress during the day<sup>32,33</sup>.  
195 In dusk-peaking modules A5 and W4, 8 significantly enriched GO-slim terms were shared ( $p$   
196  $< 0.01$ , green triangles in Fig. 2a,d,f). Several genes co-expressed in these dusk modules were  
197 involved in auxin transport and signalling including the endosomal sorting complex protein  
198 *CHMP1A* which ensures proper sorting of auxin carriers (Supplementary Note 5)<sup>34</sup>. There  
199 was also a significant enrichment for expression of transcripts encoding AP2-EREBP  
200 (ethylene responsive) and ARF (auxin responsive) transcription factor superfamilies within  
201 the W4 module (Supplementary Fig. 7). Interestingly, this was followed two hours later by  
202 the expression of genes with AP2-EREBP transcription factor binding sites in their promoter  
203 region (W5, Supplementary Fig 8).  
204 Finally, two evening-phased modules W5 and A6 ( $r=0.80$ ) were enriched for GO-slim terms  
205 concerning several metabolic processes (blue triangles in Fig. 2f). Co-expressed orthologs in  
206 these two modules included *SEVEN IN ABSENTIA2* that regulates ABA-mediated stomatal  
207 closure and drought tolerance in *Arabidopsis*<sup>35</sup>, and *HYDROPEROXIDE LYASE1* that  
208 contributes to responses to insect attack and mechanical wounding<sup>36</sup>.

#### 209 Components of the core circadian clock in *Arabidopsis* and wheat

210 We next compared the dynamics of circadian oscillator components in wheat and  
211 *Arabidopsis*. Clock gene orthologs belonging to large gene families were detected by  
212 phylogenetic analysis (Supplementary Fig. 9–13; Supplementary Table 6). Overall, wheat  
213 circadian clock genes were expressed rhythmically and with a similar phase to their  
214 *Arabidopsis* counterparts (Fig. 3). However, the free-running rhythms of clock transcripts in  
215 wheat had a mean circadian period that was approximately 3.49h longer than in *Arabidopsis*  
216 (27.23h and 23.74h, respectively).  
217 *TaLHY* and *TaTOC1* peaked sharply at dawn and dusk, respectively, during the first cycle in  
218 constant light, and maintained an  $>8$ h difference in phase throughout the experiment (Fig.  
219 3a,b). This is consistent with their phasing in *Arabidopsis*. All three homoeologs for *TaGI*  
220 were robustly rhythmic (BH  $q < 0.01$ ) and peaked at CT7 (Fig. 3c). *TaPRR73* transcripts  
221 peaked approximately 5h before *TaPRR37* transcripts, consistent with the phase divergence  
222 of *Arabidopsis* *PRR7* and *PRR3* (Fig. 3d,e). However, wheat homoeologs *TaPRR59* and  
223 *TaPRR95* had similar expression profiles ( $R^2=0.68$ ) peaking marginally apart at CT8 and  
224 CT10, in between the peak phases of *Arabidopsis* *PRR9* (CT5) and *PRR5* (CT11) (Fig. 3f,g).  
225 Therefore, the *PRR* gene family in wheat peaks in the order of; *TaPRR73*, [*TaPRR37*,

226 *TaPRR95*, *TaPRR59*] in quick succession, and finally *TaTOC1*. This sequential pattern  
227 matches the expression of PRR homologs in rice<sup>37</sup>.  
228 Transcripts encoding evening complex components, *LUX*, *ELF3* and *ELF4*, are circadian  
229 regulated in *Arabidopsis* and peak simultaneously at dusk. Three wheat triads for LUX-like  
230 genes were identified; one with higher identity to *LUX/BOA* and two similar to other *LUX*-  
231 like *Arabidopsis* genes (Supplementary Fig. 12). Transcripts from all three of these triads  
232 accumulated rhythmically and peaked from midday to dusk, *TaLUX-Lb* at CT7, *TaLUX/BOA*  
233 at CT10 and *TaLUX-La* at CT12 (Fig. 3h,i; Supplementary Fig. 14). Five wheat transcripts  
234 with homology to *Arabidopsis* *ELF4* and *ELF4-LI-4* accumulated with a mean circadian  
235 phase of 12.6h; similar to *ELF4*, but with lower relative amplitudes (Fig. 3j,k; Supplementary  
236 Fig. 14). *TaELF3* transcripts were all arrhythmic (BH  $q > 0.36$ ), and the *TaELF3-ID*  
237 homoeolog was expressed with a particularly low baseline level of 0.73 TPM in comparison  
238 to the other two homoeologs (8.7-9.7 TPM) (Fig. 3l). This is consistent with previous  
239 findings linking a deletion in *TaELF3* to the *eps* QTL on chromosome 1D in Cadenza<sup>18</sup>.  
240 We next assessed the balance of circadian expression between triad homoeologs in the core  
241 clock network. *TaLHY*, *TaGI*, and *TaPRR59* had notably similar expression patterns in terms  
242 of phase, period, relative amplitudes, and baseline expression over all timepoints (Fig.  
243 3a,c,f,g), suggesting that unbalance in these triads is strongly selected against. Homoeologs  
244 of *TaTOC1*, *TaPRR73* and *TaPRR37*(*Ppd*) had similar phases, but all had reduced expression  
245 in the A-genome homoeolog (Fig. 3b,d,e). *TaLUX/BOA-3A*, *TaLUX-La-3B* and *TaLUX-Lb-*  
246 *ID* had marginally shorter periods (>2h) and delayed phases (>2h) compared to their  
247 respective homoeologs (Supplementary Table 7).  
248 The REVEILLE family are CCA1/LHY-like MYB-domain transcription factors that are  
249 predominantly activators of evening expressed genes<sup>38,39</sup>. The wheat *RVE* genes could be  
250 split into a *LHY* clade (containing the *TaLHY* triad described above), a *RVE6/8*-like clade  
251 containing three wheat triads and a *RVE1/2/7*-like clade also containing three triads  
252 (Supplementary Fig. 9). All *TaRVE6/8* transcripts peaked at CT0-4 concurrently with *TaLHY*  
253 (Supplementary Fig. 14). The *TaRVE2/7* transcripts peaked with distinct phases; *TaRVE27b*  
254 in phase with *TaLHY*, *TaRVE27c* 4h before *TaLHY* and *TaRVE27a* approximately 12h before  
255 *TaLHY* (Supplementary Fig. 14). Based on their phylogenetic relationships, it is probable that  
256 several *RVE2/7* clade paralogs in wheat and *Arabidopsis* arose independently after their  
257 evolutionary divergence, and it is therefore interesting that they both show distinct phases of  
258 expression, suggesting homoplastic circadian functions.



259 Expression of orthologs for additional transcripts involved in circadian regulation (*FKF1*,  
260 *ZTL*, *LKP2*, *LNK1/2*, *CHE* and *LWD*) are reviewed in Supplementary Note 6 and  
261 Supplementary Fig. 14.

262 Circadian control of photosystem and light signalling gene expression is largely conserved  
263 between *Arabidopsis* and wheat

264 A further GO-slim analysis across all rhythmically-expressed genes in *Arabidopsis* and wheat  
265 identified enrichment of similar GO-slim processes including “photosynthesis” ( $p < 1 \times 10^{-14}$ ),  
266 “rhythmic process” ( $p < 1 \times 10^{-6}$ ), “response to abiotic stimulus” ( $p < 1 \times 10^{-13}$ ) and “cellular  
267 macromolecule biosynthetic process” ( $p < 1 \times 10^{-5}$ , Fisher’s exact test, Supplementary Table  
268 9). We used genes associated with some of these GO-slim terms as case-studies to highlight  
269 similarities and differences in circadian control between the two species. Expression data and  
270 Metacycle statistics for all transcripts in this analysis are in Supplementary Table 9.

271 In considering photosynthesis, we examined specifically nuclear genome-encoded  
272 photosystem (PS) proteins. Transcripts encoding the PSI components *LHCA1-6*, the PSI  
273 reaction centre subunits *PSAD* and *PSAE* and the *PSII* subunits *LHCBI-7* were rhythmically  
274 expressed in both species and had conserved phases (Supplementary Fig. 15). *LHCA1-4*  
275 peaked towards the end of the subjective day and *LHCA5* and *6* peaked during the subjective  
276 night. *PSAD* and *PSAE* peaked concurrently with *LHCA1-4*. In both species, *LHCB7*  
277 transcripts had lower relative amplitudes compared to other LHCB transcripts. *PSB27* is a  
278 protein associated transiently with the *PSII* complex involved in adaption to fluctuating light  
279 intensities<sup>40</sup>. Transcripts for this protein peaked during the subjective day in *Arabidopsis* and  
280 during the subjective night in wheat.

281 In considering the GO-slim term “response to abiotic stimulus”, we next investigated  
282 expression of transcripts for photoreceptors and light signalling proteins due to their  
283 pervasive influence upon development, metabolism, and circadian timing. Although  
284 transcripts for the UV-B photoreceptor *UVR8* accumulated with a circadian rhythm in both  
285 species, only one PHYTOCHROME ortholog (*PHYA*) and three *CRYPTOCHROME*  
286 orthologs (*CRY1*) were rhythmic in wheat out of 18 orthologs identified (Supplementary Fig.  
287 16). This contrasts with *Arabidopsis*, where *PHYA-C*, *CRY1* and *CRY2* accumulated with a  
288 circadian rhythm.

289 Downstream light signalling proteins *COP1* and *SPA* form complexes that degrade positive  
290 regulators of photomorphogenesis (e.g. *HFR1* and *HY5*) under dark conditions<sup>41</sup>. Transcripts

291 for *COPI*, *SPA4*, *HFR1* and *HY5* accumulated rhythmically and with conserved phases in  
292 both species (Supplementary Fig. 16). *COPI/SPA4* peaked synchronously around the end of  
293 the subjective night. Surprisingly, given the similar role *HFR1* and *HY5* proteins have in  
294 preventing hypocotyl elongation in low light, *HFR1* and *HY5* transcripts were expressed anti-  
295 phase to each other. *HY5* and *HFR1* act synergistically to coordinate the photomorphogenesis  
296 response, although it has been suggested that their activation is regulated through  
297 independent pathways<sup>42</sup>.

298 Wheat triads with identity to *Arabidopsis PIN1*, *PIN4*, *PIN5*, and *PIF4/5* were rhythmically  
299 expressed, alongside two triads with high similarity to rice *OsPIL11* and *OsPIL13* (<sup>43</sup>;  
300 Supplementary Fig. 16). Overall, we observe that the arrhythmic accumulation of most of the  
301 wheat *PHY* and *CRY* transcripts is not reflected in the rhythmic expression of several  
302 downstream light signalling transcripts. This supports the notion that regulatory signals from  
303 photoreceptors might occur at the level of protein stability and localisation rather than at the  
304 level of transcript accumulation, as occurs for *ZTL* or *HY5* in *Arabidopsis*.

305 A set of proteins that link light signalling, circadian regulation and chloroplasts are the sigma  
306 factors<sup>44</sup>. These light-responsive nuclear-encoded regulators of chloroplast transcription  
307 guide promoter recognition and transcription initiation by plastid encoded RNA-polymerase  
308 (PEP) on the chloroplast genome<sup>45-48</sup>. In *Arabidopsis*, *SIG1*, 3, 4, 5 and 6 were rhythmically  
309 transcribed (Supplementary Fig. 16). In wheat, all homoeologs in triads orthologous to *SIG1*,  
310 *SIG3* and *SIG5* were also rhythmic (BH  $q < 0.01$ ). Whilst the dawn phase of *TaSIG5*  
311 transcripts were similar to *AtSIG5*, *TaSIG1* transcripts were expressed over 10h earlier than  
312 *AtSIG1* (Supplementary Fig. 16). Previous research has shown that activity of *AtSIG1* can be  
313 regulated through redox-dependent phosphorylation<sup>49</sup>, and activity of all sigma factors are  
314 likely to be subject to multiple layers of regulation in addition to circadian control of  
315 transcript expression.

316

### 317 Similarities and differences in circadian control of primary metabolism genes in *Arabidopsis* 318 and wheat

319 Expression profiles of genes with key roles in primary metabolism were compared in  
320 *Arabidopsis* and wheat with a focus on enzymes that regulate trehalose 6 phosphate (Tre6P)  
321 and starch metabolism (Fig. 4). Tre6P synthase (TPS) and Tre6P phosphatase (TPP)  
322 participate in the synthesis and dephosphorylation of Tre6P, respectively. Tre6P is an

323 important signalling metabolite associated with both sucrose regulation and circadian  
324 regulation in *Arabidopsis*<sup>50-52</sup>. Tre6P also affects grain yield and drought resilience in wheat,  
325 maize, and rice<sup>53</sup>. Transcripts for *TPS1*, 2, 6, 8, 9, 10 and 11 and *TPPA*, *E*, *F*, *G* and *H* were  
326 expressed rhythmically in *Arabidopsis* (Supplementary Fig. 17). Wheat transcripts for *TPS1*  
327 (the most well-characterised of the T6P synthases) were arrhythmic, however rhythmic  
328 transcripts were found in triads more closely related to *TPS11*, 6 and 7 (Supplementary Fig.  
329 17). We identified three rhythmic TPP triads in wheat, two of which were orthologous to  
330 *Arabidopsis* *TPPA*, *F* and *G*. The third TPP triad was part of a monocot-specific clade  
331 identified by Paul et al. (2018), which also included *Zm00001d032298*, a crop improvement  
332 target in maize<sup>53</sup>.

333 Ribulose biphosphate carboxylase (Rubisco) comprises eight small (RbcS) and 8 large  
334 (RbcL) subunits, which are encoded by the nuclear and chloroplast genomes, respectively<sup>54</sup>.  
335 Rubisco requires activation by Rubisco activase (RCA) to release its activity from inhibitory  
336 substrates<sup>55</sup>. In our wheat expression data, 22 putative wheat orthologs for the small subunit  
337 of Rubisco were rhythmic, peaking during the subjective night, as *RBCS1A*, *RBCS1B*,  
338 *RBCS2B* and *RBCS3B* do in *Arabidopsis* (Supplementary Fig. 17). Two triads with identity to  
339 Rubisco activase were identified, one of which accumulated rhythmically (peaking at CT0, as  
340 with *Arabidopsis* *RCA*).

341 Circadian regulation has a pervasive influence on starch metabolism in *Arabidopsis*,  
342 particularly the nocturnal rate of transitory starch degradation<sup>23,56</sup>. Chloroplast phospho-  
343 glucose isomerase 1 (*PGII*) and chloroplast phosphoglucose mutase (*PGMI*) are essential  
344 enzymes that link the Calvin-Benson cycle with starch biosynthetic pathway<sup>57-59</sup>. In  
345 *Arabidopsis*, these transcripts accumulated with a circadian rhythm (BH  $q < 1 \times 10^{-4}$ ); *PGMI*  
346 peaked just after dusk (CT14), and *PGII* slightly later at CT20. In contrast, only one wheat  
347 *TaPGII* homoeolog was rhythmic (BH  $q < 0.01$ ), which had a low relative amplitude (0.16)  
348 and a peak phase of CT8. No homoeologs for *TaPGMI* were rhythmically expressed (BH  $q >$   
349 0.01, Supplementary Fig. 17).

350 ADP-glucose pyrophosphorylase (AGPase) mediates the first irreversible and rate-limiting  
351 step in starch biosynthesis through the formation of ADP-Glc. In *Arabidopsis*, transcripts  
352 encoding the small and large subunits of AGPase (*APL1*, *APL2*, *APL3*, *APS1*) were rhythmic,  
353 peaking at night around CT20. In comparison, in wheat only two of the eleven transcripts  
354 with homology to *APL1*, *APL2* and *APS1* were rhythmic (BH  $q < 0.01$ ), with the remaining  
355 transcripts lacking a discernible rhythm (BH  $q > 0.05$ ) (Supplementary Fig. 17).

356 Starch synthases (SS) represent another group of metabolically important enzymes that use  
357 the glucose from ADP-Glc to elongate glucan chains. In *Arabidopsis*, there are five types:  
358 SSI, SSII, SSIII, SSIV and granule bound GBSSI. SSI-IV are responsible for synthesis of  
359 amylopectin, with SSIII and IV determining starch granule number and morphology<sup>60</sup>. *GBSSI*  
360 is a known dawn-expressed gene, regulated directly by CCA1/LHY, specialised for amylose  
361 synthesis<sup>61</sup>. In wheat, *GBSSI* orthologs are called *TaWaxy* and cultivars with three null alleles  
362 produce amylose-free starch in their grain<sup>62</sup>. Comparison of starch synthase expression in  
363 *Arabidopsis* and wheat revealed several differences between the phases and relative  
364 amplitudes of these transcripts (Supplementary Fig. 18). In *Arabidopsis*, *GBSSI* transcripts  
365 had by far the greatest relative amplitude (1.26) with peak expression at dawn. The next  
366 greatest amplitudes were of *SSIV* transcripts, which peaked at CT17. *SSII* and *SSIII* peaked  
367 together at CT21 and *SSI* peaked at CT8 with a much smaller amplitude (0.12). In contrast,  
368 in wheat, an *SSIII* triad (*TaSSIIIb*) had the largest relative amplitude rhythms of the wheat  
369 starch synthases identified (0.64 - 0.73). Wheat transcripts for *SSI* and *SSIV* also peaked in  
370 the morning, whereas wheat *SSII* peaked instead in the subjective night (~CT15). In our data,  
371 *TaWaxy* (*GBSSI*) transcripts were present at a very low baseline level (<0.01 TPM) and  
372 without any circadian oscillation. However, another wheat triad, *TaGBSSII*, shared >62%  
373 identity with *Arabidopsis* *GBSSI*, and the B and D homoeologs had rhythmic expression  
374 which peaked at dawn. *TaWaxy* and *TaGBSSII* are specific to endosperm and leaf tissues,  
375 respectively<sup>63</sup>, which might explain the distribution of transcript accumulation seen here. We  
376 can conclude that the circadian clock regulates the expression of SS transcripts in both  
377 *Arabidopsis* and wheat, although there might be an emphasis on different types of SS in each  
378 species.

379 The *Arabidopsis* circadian clock regulates the rate of starch degradation so that starch  
380 reserves are depleted precisely at subjective dawn<sup>23</sup>. Many transcripts encoding starch-  
381 degrading enzymes in *Arabidopsis* had synchronized dusk peaks: Isoamylase □ type starch  
382 debranching enzyme *ISA3*; alpha-amylase *AMY3*; plastidial phosphorylase *PHS1-2*;  
383 disproportionating enzymes *DPE1-2*; glucan, water dikinases *GWD1* and *PWD* and glucan  
384 phosphatase *SEX4*. *Arabidopsis* transcripts for *BAM3*, *BAM5* and *PUI* also oscillated with a  
385 circadian rhythm, peaking later in the subjective night. Strikingly, wheat orthologs for several  
386 of these genes were not rhythmic, including *AMY3*, *DPE1*, *PWD*, *PHS1*, *PUI* and *BAM1*.  
387 Wheat orthologs for *ISA3* and *DPE2* were expressed rhythmically, but peaked approximately  
388 8-12 h ahead of their *Arabidopsis* counterparts. Some starch degradation enzymes had  
389 conserved circadian expression patterns in the two species, such as *SEX4*, *GWD1*, *BAM3* and

390 *BAM5* transcripts. GWD catalyses glucan phosphorylation and *SEX4* encodes a  
391 phosphoglucan phosphatase, both of which facilitate hydrolytic attack by  $\beta$ -amylases (BAM)  
392 in the early steps of starch degradation<sup>56,64</sup>.

393

## 394 Discussion

### 395 Conservation of circadian regulation between homoeologous genes

396 We found a large proportion of unbalanced circadian triads in our dataset. Most of these were  
397 unbalanced due to arrhythmicity in one or two homoeologs expressed at a lower mean level  
398 than the rhythmic homeologs. The reduction of expression could be due to constitutive  
399 epigenetic silencing or changes to promoter regions, allowing differential binding of  
400 transcription factors<sup>65-67</sup>. We found additional circadian unbalance in the form of altered  
401 phase, period, and relative amplitudes. It is possible that some of these differences are due to  
402 retention of circadian regulation from the ancestral genome of each homeolog (Fig. 1a),  
403 although it is likely that other differences reflect more recent diversification in expression as  
404 a step towards neo-functionalisation. It has been previously suggested that functional  
405 divergence is a likely fate for duplicated genes in a sufficiently large population<sup>68</sup>. In *B. rapa*,  
406 42% of circadian controlled paralogs had differential expression patterns<sup>28</sup>, however these  
407 paralogs arose through whole genome duplication events around 13-43 million years ago, so  
408 have been exposed to longer periods of time during which selection could act upon these  
409 duplicate genes<sup>69</sup>. In comparison, specialisation of circadian homeologs in wheat could be  
410 comparatively lower due to the relative infancy of its polyploidisation.

411

### 412 Differences between periods of rhythmic transcripts in *Arabidopsis* and wheat

413 The mean period of circadian regulated genes in wheat was over three hours longer than in  
414 *Arabidopsis*. Period length is affected by a range of exogenous conditions (e.g. light and  
415 temperature), and varies between tissues and plant age<sup>70</sup>. There is also evidence that longer  
416 periods have been selected for during cultivation of crops at higher latitudes<sup>1,2,71</sup>, potentially  
417 due to enhanced seasonal tracking capability enabling precision timing of growth and  
418 flowering<sup>72</sup>. Compared to other plant circadian transcriptome data sets, rhythmic wheat  
419 transcripts also had higher period variance (Fig 1b). The broad period distribution in wheat  
420 might be due to inclusion of all aerial material in our sampling strategy. Variation in free-

421 running periods could occur at the organ-, tissue- or cellular-level, and transcripts which are  
422 highly expressed in those regions may reflect those period differences<sup>73,74</sup>. An alternative  
423 possibility is that period variation is due to uncoupling of multiple circadian oscillators within  
424 the same cell which control expression of subsets of transcripts<sup>75-77</sup>. Future research could  
425 examine the relationship between period distributions of circadian transcriptomes and the  
426 effects of domestication, latitudinal adaption, monocot-dicot divergence, or polyploidy.

427

428 Similarities and differences in circadian regulation between wheat and *Arabidopsis*

429 Our analysis revealed extensive conservation of time-of-day specific GO-slim processes and  
430 co-expressed genes between *Arabidopsis* and wheat. These included genes involved in  
431 photosynthesis (e.g., photosystem proteins), light signalling (e.g., *HFR1*, *HY5*, *PINs* etc),  
432 translation (e.g., ribosome proteins) and auxin and ethylene responsive transcription factors.  
433 However, we also identified several interesting differences between the two species,  
434 including absence of rhythmicity in wheat *PHY* and *CRY* transcripts and antiphase expression  
435 of the wheat sigma factor *SIG1*. Furthermore, we found differences in rhythmic expression of  
436 many transcripts involved in regulating Tre6P and starch metabolism.

437 In our data, putative wheat homeologs of *TPS1* were arrhythmic. Instead, rhythmic *TPS*  
438 transcripts in wheat had similarity to *Arabidopsis TPS11*, 6 and 7 (Supplementary Fig. 18). In  
439 *Arabidopsis*, *TPS1* is the most catalytically active and best characterised *TPS*, and feeds back  
440 into the entrainment of the circadian clock<sup>51,78</sup>. If the lack of rhythmicity in wheat *TPS1*  
441 transcripts is reflected at the level of protein activity, it may indicate that Tre6P synthesis is  
442 not regulated as tightly by the circadian clock in wheat as in *Arabidopsis*. On the other hand,  
443 circadian control of other *TPS* triads may have implications for biotic or abiotic defence in  
444 wheat. *TPS5-11* have been previously implicated in control of stomatal aperture<sup>79</sup>,  
445 thermotolerance<sup>80</sup>, and defence against fungal, bacterial and aphid attack<sup>81,82</sup>. In rice, *OsTPS8*  
446 influences drought resistance through suberin deposition<sup>83</sup>, and wheat *TaTPS11* participates  
447 in a cold stress response<sup>84</sup>.

448 In wheat, transcripts for starch degradation enzymes (*PHS1*, *DPE1*, *BAM1*, *PUI*, *AMY3*,  
449 *PWD*) and starch biosynthesis enzymes (*PGII*, *PGMI*, *ISA1* and *ATPase*) had either  
450 arrhythmic expression or low relative amplitudes compared with the robust rhythms of many  
451 of these transcripts in *Arabidopsis*. Additionally, *ISA2*, *ISA3* and the starch synthases (*SSI-IV*)  
452 had differing circadian phases between the two species. While it is possible that rhythmic  
453 expression of a reduced number of genes (e.g.: *SEX4*, *GWD1*, *BAM3* and *BAM5*) is sufficient  
454 to mediate circadian control of starch degradation in wheat, these data suggest that the

455 circadian clock has a less pervasive influence upon transcriptional control of starch  
456 metabolism in wheat compared to *Arabidopsis*.

457

## 458 Conclusions

459 Our data reveal the influence of circadian regulation on the wheat transcriptome and highlight  
460 several intriguing differences between rhythmically expressed transcripts in *Arabidopsis* and  
461 wheat. It explores the added complexity of co-ordinating circadian expression across multiple  
462 sub-genomes in a hexaploid species. Given the circadian clock has been under selection  
463 during domestication and presents multiple targets for crop improvement, it is likely that this  
464 new insight into the clock in wheat will be important in the development of new sustainable  
465 and resilient cultivars. It is our hope that these data provide a resource for identifying target  
466 genes regulated by the circadian clock, allowing the relationships between chronotype, yield  
467 and resilience to be explored in future studies.

468

## 469 Methods

### 470 Plant Materials and Growth Conditions

471 Wheat: Wheat seeds cv. Cadenza were imbibed for three days on damp filter paper on a Petri  
472 dish at 4°C. Plates were moved at dawn (06.00 = ZT0), to a growth cabinet set to 22°C under  
473 12:12 light: dark cycles (approximately 200  $\mu\text{mol m}^{-2} \text{s}^{-1}$ ). After two days, only seedlings  
474 with fully emerged radicles were sown, 3 cm deep in Petersfield cereal mix in 9cm pots.  
475 Seedlings were grown under 12hlight:12hdark conditions for 14 days. After 14 days, at dawn  
476 (ZT0) seedlings were transferred to constant light conditions (L: L), tissue was sampled every  
477 4h for 3 days (18 samples in total). At each timepoint, we sampled the entire aerial  
478 tissue from 3 replicate plants, which was frozen immediately in liquid nitrogen before storage  
479 at -80°C. Total RNA was extracted using Qiagen RNeasy plant mini kits (cat. no. 74904)  
480 with on-column DNase treatment (RNase-Free DNase Set (cat. no. 79254). RNA  
481 concentration and integrity were quantified using a Nanodrop Spectrophotometer and Perkin  
482 Elmer LabChip GX Nucleic acid analyser before sequencing.  
483 Details of growth conditions for *Arabidopsis*<sup>26</sup>, *Brassica rapa*<sup>28</sup>, *Brachypodium distachyon*<sup>85</sup>  
484 and *Glycine max*<sup>86</sup> datasets can be viewed in their source manuscripts. Briefly, all circadian  
485 data were measured under constant light and temperature following 12h:12h light:dark  
486 entrainment other than *Glycine max*<sup>86</sup> which was entrained under 16h:8h light:dark cycles.

487 Wheat mRNA sequencing, read alignment and quantification

488 Library preparation was carried out following the Illumina TruSeq protocol and reads were  
489 sequenced on a NovaSeq S2 flow cell at the Earlham Institute. 150bp paired-end reads were  
490 generated from each library to an average depth of 84M reads per replicate. Reads were  
491 filtered for quality and any remaining adaptor sequence was trimmed with Trimmomatic<sup>87</sup>.  
492 Surviving reads were aligned to the Chinese Spring RefSeq v1.1 wheat genome<sup>11</sup> using  
493 HISAT2<sup>88</sup> with default parameters. Uniquely mapping reads were then quantified using  
494 StringTie<sup>89</sup> and TPM values were extracted for each gene per sample.

495 Processing and quantification of previously published datasets

496 Raw reads from previously published circadian datasets were downloaded for *Arabidopsis*<sup>26</sup>,  
497 *Brassica rapa*<sup>28</sup>, and *Brachypodium distachyon*<sup>85</sup>. These reads were filtered for quality, and  
498 any remaining adaptor sequence trimmed with Trimmomatic<sup>87</sup>. Surviving reads were aligned  
499 using HISAT2<sup>88</sup> to *A. thaliana* genome (TAIR 10), *B. rapa* genome (v1.0) and the *B.*  
500 *distachyon* genome (v3.0) respectively. For the *Arabidopsis* alignment, maximum intron  
501 length was set to 5000nt consistent with pre-processing in<sup>26,90</sup>. StringTie<sup>89</sup> was used to  
502 quantify uniquely mapping reads before TPM value extraction at gene level. For Glycine  
503 max<sup>86</sup>, FPKM normalised reads were downloaded from the Glycine Max RNA-seq  
504 Database<sup>91</sup> (accession GSE94228) and were converted from FPKM to TPM prior to analysis.  
505

506 Homolog identification of circadian clock and circadian controlled genes

507 Wheat homologs of *Arabidopsis* core circadian clock genes were identified in the wheat  
508 genome by detecting similarity to the following conserved protein family domains that are  
509 present in the proteins encoded by these genes: MYB1R, a subtype of MYB domain that  
510 contains a distinctive ‘SHAQKY’ sequence motif (present in the CCA1, LHY and RVE[1-8])  
511 or a distinctive ‘SHLQKY’ sequence motif (present in LUX), PAS (present in ZTL), PRR  
512 (present in TOC1 and PRR[3579]) and ELF4 (present in ELF4). A hidden Markov model  
513 (HMM) for each domain was used in HMMER 3.2.1 HMMSEARCH<sup>92</sup> to search for  
514 members of the domain family in the following proteome datasets: Araport11 (*Arabidopsis*  
515 *thaliana*), RGAP7 (*Oryza sativa*), JGI Phytozome version 12 (*Brachypodium distachyon*),  
516 IBSC (*Hordeum vulgare*), SpudDB PGSC v4.03 (*Solanum tuberosum*) and IWGSC Refseq  
517 v1.1 (*Triticum aestivum*). The HMMs provided by Pfam (<https://pfam.xfam.org/>) were used



518 for the PAS domain (PAS\_9, PF13426), the PRR domain (Response\_reg, PF00072) and the  
519 ELF4 domain (PF07011). For the MYB domain, an HMM was built for the MYB1R  
520 subfamily using HMMER3 HMMBUILD<sup>92</sup> with an alignment of protein sequences from  
521 *Arabidopsis* and rice, previously established as being members of this subfamily. The  
522 sequences found from these genomes were re-aligned to the original alignment using  
523 HMMER 3.2.1 HMMALIGN<sup>92</sup>. Amino acids with non-match states in the HMM were  
524 removed from the alignment and alignment columns with <70% occupancy were also  
525 removed. The longest splice variant of each protein was selected to estimate a phylogenetic  
526 tree with bootstrap support using RAxML 8.2.12<sup>93</sup> with the following method parameters set:  
527 -f a, -x 12345, -p 12345, -# 100, -m PROTCATJTT. The trees were mid-point rooted and  
528 images created using the Interactive Tree of Life (iTOL) tool<sup>94</sup>. For the larger MYB and PRR  
529 families, proteins from the tree clades containing known clock gene(s) were re-aligned across  
530 their full-length and a “nested” phylogenetic tree was re-estimated with RAxML as described  
531 above. The tree was visualised in the Interactive Tree Of Life (iTOL) website alongside the  
532 corresponding alignment. This view provided increased detail about the relationships within  
533 the clade and enabled orthologous sequences to be inferred. Wheat homologues for *ELF3*,  
534 *GI*, *LWD1/2*, *CHE*, and *LNK1/2* were identified by BLASTP searches using previously  
535 identified wheat and *Brachypodium* predicted proteins confirmed by reciprocal BLAST  
536 searches against *Arabidopsis*. IDs and source references can be viewed in Supplementary  
537 Table 6.

538 Putative wheat orthologs for *Arabidopsis* circadian controlled pathway genes involved in  
539 photosynthesis, light-signalling and primary metabolism were first extracted using Biomart  
540 v0.7<sup>95</sup> available from Ensembl Plants and taken forward if they had >40% identity in the  
541 DNA sequence. Orthologs were then verified using BLASTP using *Arabidopsis* protein  
542 sequences as a query against the wheat protein database to confirm the wheat gene IDs.  
543 Complete lists of wheat gene IDs used in the pathway analysis can be viewed in  
544 Supplementary Table 9.

545

#### 546 Circadian quantification using Metacycle and Biodare2

547 To estimate proportions of rhythmic genes expressed in *Arabidopsis* and wheat, we removed  
548 only genes with 0 TPM at all timepoints. This approach has been used in several previous  
549 studies<sup>26,96,97</sup> and allows detection of low-expression rhythmic transcripts. An analysis of how

550 filtering for low-expression genes affects the estimates of proportions of rhythmically  
551 expressed genes is discussed in Supplementary Note 1 and Supplementary Table 1.  
552 The R package MetaCycle<sup>98</sup> was used to identify rhythmically expressed transcripts  
553 (Benjamini-Hochberg  $q$ -values) and to quantify period lengths (hours), absolute phase  
554 (hours), baseline expression (TPM), amplitudes (TPM) and relative amplitudes of circadian  
555 waveforms. Relative amplitude is the ratio between amplitude and baseline TPM if the  
556 baseline is greater than 1. Metacycle integrates results from three independent algorithms  
557 (ARSER, JTK\_CYCLE and Lomb-Scargle) to produce summary “meta2d” statistics that  
558 combine the outcome from these algorithms. Metacycle was run using the following  
559 parameters; minper = 12, maxper = 35, adjustPhase = "predictedPer". Transcripts were  
560 defined as rhythmic if they had  $q$ -values < 0.05 and high confidence rhythmic transcripts if  
561 they have  $q$ -values < 0.01. To calculate circadian phase (CT; relative to period length=24),  
562 meta2d phase estimates were multiplied by 24 and then divided by the period estimates for  
563 each transcript. Circular phase means were calculated using the package ‘circular’  
564 implemented in R<sup>99</sup>.

565 There are many different algorithms available for quantification of rhythmicity within time-  
566 series data, some of which perform better on datasets with higher levels of noise, non-24h  
567 periods or various sampling frequencies. To validate the meta2d results we also used the  
568 FFT-NLLS and MESA algorithms implemented in Biodare2 to verify our observations about  
569 period, phase and rhythmicity<sup>100</sup>. FFT-NLLS also provides relative amplitude error (RAE)  
570 statistics which represent a useful metric for assessing rhythmic robustness. FFT-NLLS and  
571 MESA were run using the BH  $q$  < 0.01 filtered transcripts categorized in Metacycle, and with  
572 the following parameters: no dtr, min-max, p(12.0-35.0).

573 To enable as close a comparison with the *Arabidopsis* dataset as possible, the wheat time-  
574 course was cropped to a data window of 24-68h for approximation of period, phase and  
575 relative amplitude unless specified otherwise. This data-window also ensures that  
576 measurements are being made under circadian conditions following transfer to constant light.  
577 For the triad analysis, meta2d estimates were measured over the full time-course (0-68h) as  
578 differentiation of homeolog behaviour was the main interest, including the response to  
579 transfer to L:L.

580

581 Clustering of rhythmic genes into expression modules

582 Gene co-expression analysis was carried out using the R package WGCNA (Langfelder and  
583 Horvath, 2008; R version 3.6.0.).

584 *Arabidopsis*: The 10,317 genes identified by MetaCycle as significantly rhythmic (q-value <  
585 0.01) were filtered and genes with greater than 0.5 TPM average expression at more than  
586 three timepoints were retained for further analysis. The average expression at each timepoint  
587 for the remaining 10,129 genes was used to construct signed hybrid networks on a replicate  
588 basis using the `blockwiseModules()` function. The soft power threshold was calculated as 18,  
589 and the following parameters were used; `minModuleSize = 30`, `corType = bicor`,  
590 `maxPOutliers = 0.05`, `mergeCutHeight = 0.15`. Highly connected hub genes were identified  
591 for each of the 9 co-expression modules using the function `chooseTopHubInEachModule()`  
592 and eigengenes were identified for each module using the `moduleEigengenes()` function.

593 Wheat: The 18,633 genes identified by MetaCycle as significantly rhythmic across 12  
594 timepoints ZT24 - ZT68 (q-value < 0.01) were filtered and genes with greater than 0.5 TPM  
595 average expression at more than three timepoints were retained for further analysis. The  
596 average expression at each timepoint for the remaining 16,327 genes was used to construct  
597 signed hybrid networks using the `blockwiseModules()` function. A soft power threshold of 18  
598 was used, together with the following parameters; `minModuleSize = 30`, `corType = bicor`,  
599 `maxPOutliers = 0.05`, `mergeCutHeight = 0.15`. Eigengenes were identified for each module  
600 using the `moduleEigengenes()` function. Modules with closely correlated eigengenes were  
601 merged using the `mergeCloseModules()` function, with the parameters; `cutHeight = 0.25`,  
602 `iterate = F`) and new module eigengenes were calculated for the resulting 9 modules.

603

604 Cross-correlation analysis

605 A cross-correlation analysis was used to find the shift in time (lag) which produced the  
606 highest (peak) correlation between two rhythms. This approach was used to identify modules  
607 which peaked synchronously (had a peak lag of 0h) or asynchronously (had a peak lag of 4, 8  
608 or 12h) by correlating eigengenes for each module (Supplementary Fig. 6). We also used  
609 cross-correlation to identify unbalanced phases within rhythmic triads (Fig. 1E). Before  
610 calculating the cross-correlation between two expression rhythms, we first scaled both  
611 expression patterns using their means and standard deviations, so the output reflects a time-  
612 dependent Pearson correlation coefficient ranging between -1 and 1:

$$Z_A = \frac{X_A - \bar{X}_A}{S_A}, Z_B = \frac{X_B - \bar{X}_B}{S_B}$$

613 Where  $Z_i$ ,  $X_i$ ,  $\bar{X}_i$  and  $S_i$  represent the standardised expression level, tpm expression level,  
614 mean expression level, and standard deviation of gene A and B respectively. Once both  
615 expression patterns have been scaled, the discrete cross-correlation between the two  
616 expression patterns is calculated using the `np.correlate` function and is divided by the number  
617 of time points in the expression signal returning the Pearson correlation coefficient at  
618 different lags. The index of the array with the largest Pearson correlation coefficient score  
619 corresponds to the lag that maximises the phase similarity between the two temporal  
620 expression patterns.

#### 621 Mean-normalised data for oscillation plots

622 Oscillation plots in Supplementary Fig. 15-17 were mean normalised to aid visualisation of  
623 period and phase differences between transcripts. Data was adjusted by dividing the TPM  
624 values at each timepoint by the mean across all timepoints for each gene so that the baseline  
625 expression was equal to 1.

#### 626 Gene ontology term enrichment

627 Functional enrichment of differentially expressed genes for biological processes within each  
628 module was performed using the gene ontology enrichment analysis package, `topGO`<sup>10</sup> in R  
629 (version 3.6.0, with the following parameters: `nodeSize = 10`, `algorithm = "parentchild"`,  
630 `classicFisher test p < 0.05`). Enrichment of terms in all rhythmic genes in *Arabidopsis* and  
631 wheat was compared against a background ‘gene universe’ of all expressed genes in each  
632 dataset (26,392 genes for *Arabidopsis* and 86,567 for wheat). This gene universe was also  
633 used in the GO-slim analysis for enrichment in circadian balanced versus unbalanced triads.  
634 Enrichment of terms in expression modules was compared against a background of all  
635 rhythmically expressed genes (BH  $q < 0.01$ ) which clustered into modules in each dataset  
636 (10,129 genes for *Arabidopsis* and 16,327 for wheat). GO-slim terms refer to ontology terms  
637 for biological processes unless otherwise specified and were obtained from Ensembl Plants  
638 51<sup>11</sup>, using the BioMart tool. The bubble plot was plotted using `ggplot` in R adapting code  
639 from (De Vega et al., 2021).

640

641 Enrichment analysis of transcription factor superfamilies in wheat co-expression modules

642 Genes annotated as members of transcription factor superfamilies<sup>27</sup> were identified in each  
643 co-expression module and the frequency of each TF superfamily compared to the frequency  
644 observed in the 16,327 genes submitted to WGCNA. TF families were classed as either  
645 significantly under or overrepresented in each module using Fisher's exact test ( $p \leq 0.05$ ).  
646

647 Enrichment analysis of transcription factor binding sites in wheat co-expression modules

648 1.5 kb of sequence upstream of the transcription start site (TSS) was extracted for each of the  
649 16,327 genes submitted to WGCNA. FIMO, from the MEME tool suite (v 4.11.1) was used  
650 to predict TFBS in these regions based on similarity with previously DAP-seq validated  
651 TFBS identified in *Arabidopsis*<sup>102</sup>. FIMO was run as reported in Ramírez-González et al.,  
652 2018 (p-value threshold of  $<1e-04$  (default), --motifpseudo set to 1e-08 as recommended for  
653 use with PWMs and a --max-stored-scores of 1,000,000). The background model was  
654 generated from the 16,327 promoter sequences using MEME fasta-get-markov. As the  
655 significance of multiple matches of a single TFBS family in the putative promoter region for  
656 each gene is unknown, we derived a non-redundant (nr) list of matched TFBS motifs for each  
657 gene within each of the nine modules and for the complete set of 16,327 genes, where  
658 multiple occurrences of a TFBS superfamily in a single promoter sequence were only  
659 counted once. The frequency of these nrTFBS motifs for each co-expression module was  
660 compared to the frequency of nrTFBS seen across all 16,327 genes and families significantly  
661 under or overrepresented in each module were identified using Fisher's exact test ( $p \leq 0.05$ ).  
662

663 Statistical analysis

664 Statistical tests including Welch's two sample t-test, Two-proportions z-test, One-way  
665 ANOVA, Two-level, nested ANOVA and Chi-square tests of independence were all  
666 conducted in the R 'stats' package (version 4.0.0) with default parameters.

667

668 Data availability

669 Fastq data from the RNA-seq circadian time course are available to view from the Grassroots  
670 Data Repository: [https://opendata.earlham.ac.uk/opendata/data/wheat\\_circadian\\_Rees\\_2021](https://opendata.earlham.ac.uk/opendata/data/wheat_circadian_Rees_2021).

671 [Data will be uploaded to the European Nucleotide Archive (ENA) during the review  
672 process]  
673

## 674 References

- 675 1. Greenham, K. *et al.* Geographic variation of plant circadian clock function in natural and agricultural  
676 settings. *J. Biol. Rhythms* **32**, 26–34 (2017).
- 677 2. Müller, N. A. *et al.* Domestication selected for deceleration of the circadian clock in cultivated tomato.  
678 *Nat. Genet.* **48**, 89–93 (2016).
- 679 3. McClung, C. R. Circadian Clock Components Offer Targets for Crop Domestication and Improvement.  
680 *Genes (Basel)*. **12**, 374 (2021).
- 681 4. Steed, G., Ramirez, D. C., Hannah, M. A. & Webb, A. A. R. Chronoculture, harnessing the circadian  
682 clock to improve crop yield and sustainability. *Science (80-. )*. **372**, (2021).
- 683 5. Hazen, S. P. *et al.* LUX ARRHYTHMO encodes a Myb domain protein essential for circadian  
684 rhythms. *Proc. Natl. Acad. Sci. U. S. A.* **102**, 10387–10392 (2005).
- 685 6. Nakamichi, N., Kita, M., Ito, S., Yamashino, T. & Mizuno, T. PSEUDO-RESPONSE REGULATORS,  
686 PRR9, PRR7 and PRR5, Together play essential roles close to the circadian clock of *Arabidopsis thaliana*. *Plant*  
687 *Cell Physiol.* **46**, 686–698 (2005).
- 688 7. Somers, D. E., Webb, A. A. R., Pearson, M. & Kay, S. A. The short-period mutant, *toc1-1*, alters  
689 circadian clock regulation of multiple outputs throughout development in *Arabidopsis thaliana*. *Development*  
690 **125**, 485–494 (1998).
- 691 8. Wang, Z. Y. & Tobin, E. M. Constitutive expression of the CIRCADIAN CLOCK ASSOCIATED 1  
692 (CCA1) gene disrupts circadian rhythms and suppresses its own expression. *Cell* **93**, 1207–1217 (1998).
- 693 9. Salamini, F., Özkan, H., Brandolini, A., Schäfer-Pregl, R. & Martin, W. Genetics and geography of  
694 wild cereal domestication in the near east. *Nature Reviews Genetics* vol. 3 429–441 (2002).
- 695 10. Araus, J. L., Slafer, G. A., Romagosa, I. & Molist, M. FOCUS: Estimated wheat yields during the  
696 emergence of agriculture based on the carbon isotope discrimination of grains: Evidence from a 10th millennium  
697 BP site on the euphrates. *J. Archaeol. Sci.* **28**, 341–350 (2001).
- 698 11. IWGSC *et al.* Shifting the limits in wheat research and breeding using a fully annotated reference  
699 genome. *Science (80-. )*. **361**, (2018).
- 700 12. Hernando, C. E., Romanowski, A. & Yanovsky, M. J. Transcriptional and post-transcriptional control  
701 of the plant circadian gene regulatory network. *Biochim. Biophys. Acta - Gene Regul. Mech.* **1860**, 84–94  
702 (2017).
- 703 13. Chaw, S. M., Chang, C. C., Chen, H. L. & Li, W. H. Dating the monocot-dicot divergence and the  
704 origin of core eudicots using whole chloroplast genomes. *J. Mol. Evol.* **58**, 424–441 (2004).
- 705 14. Turner, A., Beales, J., Faure, S., Dunford, R. P. & Laurie, D. A. The pseudo-response regulator Ppd-H1  
706 provides adaptation to photoperiod in barley. *Science (80-. )*. **310**, 1031–1034 (2005).

- 707 15. Shaw, L. M., Turner, A. S. & Laurie, D. A. The impact of photoperiod insensitive Ppd-1a mutations on  
708 the photoperiod pathway across the three genomes of hexaploid wheat (*Triticum aestivum*). *Plant J.* **71**, 71–84  
709 (2012).
- 710 16. Laurie, D. A. Comparative genetics of flowering time. *Plant Mol. Biol.* **35**, 167–177 (1997).
- 711 17. Xiang, Y. Z., Mao, S. L., Jia, R. L., Chun, M. G. & Xian, S. Z. The wheat TaG11, involved in  
712 photoperiodic flowering, encodes an Arabidopsis GI ortholog. *Plant Mol. Biol.* **58**, 53–64 (2005).
- 713 18. Zikhali, M., Wingen, L. U. & Griffiths, S. Delimitation of the Earliness per se D1 (Eps-D1) flowering  
714 gene to a subtelomeric chromosomal deletion in bread wheat (*Triticum aestivum*). *J. Exp. Bot.* **67**, 287–299  
715 (2016).
- 716 19. Wang, J. *et al.* TaELF3-1DL, a homolog of ELF3, is associated with heading date in bread wheat. *Mol.*  
717 *Breed.* **36**, 1–9 (2016).
- 718 20. Mizuno, N., Nitta, M., Sato, K. & Nasuda, S. A wheat homologue of PHYTOCLOCK 1 is a candidate  
719 gene conferring the early heading phenotype to einkorn wheat. *Genes Genet. Syst.* **87**, 357–367 (2012).
- 720 21. Zhang, W. *et al.* Functional studies of heading date-related gene TaPRR73, a paralog of ppd1 in  
721 common wheat. *Front. Plant Sci.* **7**, 772 (2016).
- 722 22. Dodd, A. N. *et al.* Plant circadian clocks increase photosynthesis, growth, survival, and competitive  
723 advantage. *Science (80-. )*. **309**, 630–633 (2005).
- 724 23. Graf, A., Schlereth, A., Stitt, M. & Smith, A. M. Circadian control of carbohydrate availability for  
725 growth in Arabidopsis plants at night. *Proc. Natl. Acad. Sci. U. S. A.* **107**, 9458–9463 (2010).
- 726 24. Harmer, S. L. *et al.* Orchestrated transcription of key pathways in Arabidopsis by the circadian clock.  
727 *Science (80-. )*. **290**, 2110–3 (2000).
- 728 25. Millar, A. J. & Kay, S. A. Circadian Control of cab Gene Transcription and mRNA Accumulation in  
729 Arabidopsis. *Plant Cell* **3**, 541–550 (1991).
- 730 26. Romanowski, A., Schlaen, R. G., Perez-Santangelo, S., Mancini, E. & Yanovsky, M. J. Global  
731 transcriptome analysis reveals circadian control of splicing events in Arabidopsis thaliana. *Plant J.* **103**, 889–  
732 902 (2020).
- 733 27. Ramírez-González, R. H. *et al.* The transcriptional landscape of polyploid wheat. *Science (80-. )*. **361**,  
734 (2018).
- 735 28. Greenham, K. *et al.* Expansion of the circadian transcriptome in Brassica rapa and genome-wide  
736 diversification of paralog expression patterns. *Elife* **9**, 1–68 (2020).
- 737 29. Zhao, J. *et al.* Genome-Wide Identification and Expression Profiling of the TCP Family Genes in Spike  
738 and Grain Development of Wheat (*Triticum aestivum* L.). *Front. Plant Sci.* **9**, (2018).
- 739 30. Takumi, S., Shimamura, C. & Kobayashi, F. Increased freezing tolerance through up-regulation of  
740 downstream genes via the wheat CBF gene in transgenic tobacco. *Plant Physiol. Biochem.* **46**, 205–211 (2008).
- 741 31. Jouffe, C. *et al.* The Circadian Clock Coordinates Ribosome Biogenesis. *PLoS Biol.* **11**, 1001455  
742 (2013).
- 743 32. Mao, G., Seebeck, T., Schrenker, D. & Yu, O. CYP709B3, a cytochrome P450 monooxygenase gene  
744 involved in salt tolerance in Arabidopsis thaliana. *BMC Plant Biol.* **13**, 1–13 (2013).
- 745 33. Pan, Y. *et al.* Cytochrome P450 monooxygenases as reporters for circadian-regulated pathways. *Plant*  
746 *Physiol.* **150**, 858–878 (2009).

- 747 34. Spitzer, C. *et al.* The ESCRT-Related CHMP1A and B Proteins Mediate Multivesicular Body Sorting  
748 of Auxin Carriers in Arabidopsis and Are Required for Plant Development. *Plant Cell* **21**, 749–766 (2009).
- 749 35. Bao, Y. *et al.* The tumor necrosis factor receptor-associated factor (TRAF)-like family protein SEVEN  
750 IN ABSENTIA 2 (SINA2) promotes drought tolerance in an ABA-dependent manner in Arabidopsis. *New*  
751 *Phytol.* **202**, 174–187 (2014).
- 752 36. Noordermeer, M. A., Veldink, G. A. & Vliegthart, J. F. G. Fatty acid hydroperoxide lyase: A plant  
753 cytochrome P450 enzyme involved in wound healing and pest resistance. *ChemBioChem* **2**, 494–504 (2001).
- 754 37. Murakami, M., Ashikari, M., Miura, K., Yamashino, T. & Mizuno, T. The Evolutionarily Conserved  
755 OsPRR Quintet: Rice Pseudo-Response Regulators Implicated in Circadian Rhythm. *Plant Cell Physiol.* **44**,  
756 1229–1236 (2003).
- 757 38. Shalit-Kaneh, A., Kumimoto, R. W., Filkov, V. & Harmer, S. L. Multiple feedback loops of the  
758 Arabidopsis circadian clock provide rhythmic robustness across environmental conditions. *Proc. Natl. Acad.*  
759 *Sci. U. S. A.* **115**, 7147–7152 (2018).
- 760 39. Hsu, P. Y., Devisetty, U. K. & Harmer, S. L. Accurate timekeeping is controlled by a cycling activator  
761 in Arabidopsis. *Elife* **2013**, 473 (2013).
- 762 40. Hou, X., Fu, A., Garcia, V. J., Buchanan, B. B. & Luan, S. PSB27: A thylakoid protein enabling  
763 Arabidopsis to adapt to changing light intensity. *Proc. Natl. Acad. Sci.* **112**, 1613–1618 (2015).
- 764 41. Ponnu, J. & Hoecker, U. Illuminating the COP1/SPA Ubiquitin Ligase: Fresh Insights Into Its Structure  
765 and Functions During Plant Photomorphogenesis. *Front. Plant Sci.* **0**, 486 (2021).
- 766 42. Jang, I.-C., Henriques, R. & Chua, N.-H. Three Transcription Factors, HFR1, LAF1 and HY5,  
767 Regulate Largely Independent Signaling Pathways Downstream of Phytochrome A. *Plant Cell Physiol.* **54**,  
768 907–916 (2013).
- 769 43. Nakamura, Y., Kato, T., Yamashino, T., Murakami, M. & Mizuno, T. Characterization of a set of  
770 phytochrome-interacting factor-like bHLH proteins in *Oryza sativa*. *Biosci. Biotechnol. Biochem.* **71**, 1183–  
771 1191 (2007).
- 772 44. Noordally, Z. B. *et al.* Circadian Control of Chloroplast Transcription by a Nuclear-Encoded Timing  
773 Signal. *Science (80-. )*. **339**, 1316–1319 (2013).
- 774 45. Tanaka, K. *et al.* Characterization of three cDNA species encoding plastid RNA polymerase sigma  
775 factors in *Arabidopsis thaliana*: Evidence for the sigma factor heterogeneity in higher plant plastids. *FEBS Lett.*  
776 **413**, 309–313 (1997).
- 777 46. Kanamaru, K. *et al.* Plastidic RNA polymerase  $\sigma$  factors in Arabidopsis. *Plant Cell Physiol.* **40**, 832–  
778 842 (1999).
- 779 47. Allison, L. A. The role of sigma factors in plastid transcription. *Biochimie* vol. 82 537–548 (2000).
- 780 48. Kanamaru, K. & Tanaka, K. Roles of chloroplast RNA polymerase sigma factors in chloroplast  
781 development and stress response in higher plants. *Biosci. Biotechnol. Biochem.* **68**, 2215–2223 (2004).
- 782 49. Shimizu, M. *et al.* Sigma factor phosphorylation in the photosynthetic control of photosystem  
783 stoichiometry. *Proc. Natl. Acad. Sci. U. S. A.* **107**, 10760–10764 (2010).
- 784 50. Figueroa, C. M. & Lunn, J. E. A tale of two sugars: Trehalose 6-phosphate and sucrose. *Plant*  
785 *Physiology* vol. 172 7–27 (2016).



- 786 51. Frank, A. *et al.* Circadian Entrainment in Arabidopsis by the Sugar-Responsive Transcription Factor  
787 bZIP63. *Curr. Biol.* **28**, 2597-2606.e6 (2018).
- 788 52. Fichtner, F. & Lunn, J. E. The Role of Trehalose 6-Phosphate (Tre6P) in Plant Metabolism and  
789 Development. *Annu. Rev. Plant Biol.* **72**, 737–760 (2021).
- 790 53. Paul, M. J., Gonzalez-Uriarte, A., Griffiths, C. A. & Hassani-Pak, K. The Role of Trehalose 6-  
791 Phosphate in Crop Yield and Resilience. *Plant Physiol.* **177**, 12–23 (2018).
- 792 54. Gruber, A. V. & Feiz, L. Rubisco assembly in the chloroplast. *Frontiers in Molecular Biosciences* vol.  
793 5 24 (2018).
- 794 55. Bhat, J. Y., Thieulin-Pardo, G., Hartl, F. U. & Hayer-Hartl, M. Rubisco activases: AAA+ chaperones  
795 adapted to enzyme repair. *Frontiers in Molecular Biosciences* vol. 4 20 (2017).
- 796 56. Smith, S. M. *et al.* Diurnal changes in the transcriptome encoding enzymes of starch metabolism  
797 provide evidence for both transcriptional and posttranscriptional regulation of starch metabolism in arabidopsis  
798 leaves. *Plant Physiol.* **136**, 2687–2699 (2004).
- 799 57. Periappuram, C. *et al.* The Plastidic Phosphoglucomutase from Arabidopsis. A Reversible Enzyme  
800 Reaction with an Important Role in Metabolic Control. *Plant Physiol.* **122**, 1193 (2000).
- 801 58. Bahaji, A. *et al.* Plastidic phosphoglucose isomerase is an important determinant of starch  
802 accumulation in mesophyll cells, growth, photosynthetic capacity, and biosynthesis of plastidic cytokinins in  
803 Arabidopsis. *PLoS One* **10**, e0119641 (2015).
- 804 59. Lee, S. K. *et al.* Plastidic phosphoglucomutase and ADP-glucose pyrophosphorylase mutants impair  
805 starch synthesis in rice pollen grains and cause male sterility. *J. Exp. Bot.* **67**, 5557–5569 (2016).
- 806 60. Nielsen, M. M. *et al.* Crystal structures of the catalytic domain of Arabidopsis thaliana starch synthase  
807 IV, of granule bound starch synthase from CLG1 and of granule bound starch synthase I of Cyanophora  
808 paradoxa illustrate substrate recognition in starch synthases. *Front. Plant Sci.* **9**, 1138 (2018).
- 809 61. Tenorio, G., Orea, A., Romero, J. M. & Mérida, Á. Oscillation of mRNA level and activity of granule-  
810 bound starch synthase I in Arabidopsis leaves during the day/night cycle. *Plant Mol. Biol.* **51**, 949–958 (2003).
- 811 62. Yamamori, M., Nakamura, T., Endo, T. R. & Nagamine, T. Waxy protein deficiency and chromosomal  
812 location of coding genes in common wheat. *Theor. Appl. Genet.* **89**, 179–184 (1994).
- 813 63. Vrinten, P. L. & Nakamura, T. Wheat granule-bound starch synthase I and II are encoded by separate  
814 genes that are expressed in different tissues. *Plant Physiol.* **122**, 255–263 (2000).
- 815 64. Kaplan, F., Sung, D. Y. & Guy, C. L. Roles of  $\beta$ -amylase and starch breakdown during temperatures  
816 stress. *Physiol. Plant.* **126**, 120–128 (2006).
- 817 65. Otto, S. P. The Evolutionary Consequences of Polyploidy. *Cell* **131**, 452–462 (2007).
- 818 66. Gardiner, L. J. *et al.* A genome-wide survey of DNA methylation in hexaploid wheat. *Genome Biol.*  
819 **16**, 1–15 (2015).
- 820 67. Chen, Z. J. & Mas, P. Interactive roles of chromatin regulation and circadian clock function in plants.  
821 *Genome Biol.* **20**, 1–12 (2019).
- 822 68. Walsh, J. B. How often do duplicated genes evolve new functions? *Genetics* **139**, 421–428 (1995).
- 823 69. Lou, P. *et al.* Preferential retention of circadian clock genes during diploidization following whole  
824 genome triplication in Brassica rapa. *Plant Cell* **24**, 2415–2426 (2012).

- 825 70. Rees, H. *et al.* A high-throughput delayed fluorescence method reveals underlying differences in the  
826 control of circadian rhythms in *Triticum aestivum* and *Brassica napus*. *Plant Methods* **15**, 51 (2019).
- 827 71. Yarkhunova, Y. *et al.* Selection during crop diversification involves correlated evolution of the  
828 circadian clock and ecophysiological traits in *Brassica rapa*. *New Phytol.* **210**, 133–144 (2016).
- 829 72. Michael, T. P. *et al.* Enhanced Fitness Conferred by Naturally Occurring Variation in the Circadian  
830 Clock. *Science (80-. )*. **302**, 1049–1053 (2003).
- 831 73. Gould, P. D. *et al.* Coordination of robust single cell rhythms in the *Arabidopsis* circadian clock via  
832 spatial waves of gene expression. *Elife* **7**, (2018).
- 833 74. Takahashi, N., Hirata, Y., Aihara, K. & Mas, P. A Hierarchical Multi-oscillator Network Orchestrates  
834 the *Arabidopsis* Circadian System. *Cell* **163**, 148–159 (2015).
- 835 75. Locke, J. C. W. *et al.* Experimental validation of a predicted feedback loop in the multi-oscillator clock  
836 of *Arabidopsis thaliana*. *Mol. Syst. Biol.* **2**, 59 (2006).
- 837 76. Hall, A., Kozma-Bognár, L., Bastow, R. M., Nagy, F. & Millar, A. J. Distinct regulation of CAB and  
838 PHYB gene expression by similar circadian clocks. *Plant J.* **32**, 529–537 (2002).
- 839 77. Hotta, C. T. *et al.* Are there multiple circadian clocks in plants? *Plant Signal. Behav.* **3**, 342 (2008).
- 840 78. Delorge, I., Figueroa, C. M., Feil, R., Lunn, J. E. & Van Dijck, P. Trehalose-6-phosphate synthase 1 is  
841 not the only active TPS in *Arabidopsis thaliana*. *Biochem. J.* **466**, 283–290 (2015).
- 842 79. Tian, L. *et al.* The trehalose-6-phosphate synthase TPS5 negatively regulates ABA signaling in  
843 *Arabidopsis thaliana*. *Plant Cell Rep.* **38**, 869–882 (2019).
- 844 80. Suzuki, N., Bajad, S., Shuman, J., Shulaev, V. & Mittler, R. The Transcriptional Co-activator MBF1c  
845 Is a Key Regulator of Thermotolerance in *Arabidopsis thaliana*. *J. Biol. Chem.* **283**, 9269–9275 (2008).
- 846 81. Wang, X., Du, Y. & Yu, D. Trehalose phosphate synthase 5-dependent trehalose metabolism  
847 modulates basal defense responses in *Arabidopsis thaliana*. *J. Integr. Plant Biol.* **61**, 509–527 (2019).
- 848 82. V, S. *et al.* TREHALOSE PHOSPHATE SYNTHASE11-dependent trehalose metabolism promotes  
849 *Arabidopsis thaliana* defense against the phloem-feeding insect *Myzus persicae*. *Plant J.* **67**, 94–104 (2011).
- 850 83. Vishal, B., Krishnamurthy, P., Ramamoorthy, R. & Kumar, P. P. OsTPS8 controls yield-related traits  
851 and confers salt stress tolerance in rice by enhancing suberin deposition. *New Phytol.* **221**, 1369–1386 (2019).
- 852 84. Liu, X. *et al.* Overexpression of the wheat trehalose 6-phosphate synthase 11 gene enhances cold  
853 tolerance in *Arabidopsis thaliana*. *Gene* **710**, 210–217 (2019).
- 854 85. MacKinnon, K. J. M. *et al.* Changes in ambient temperature are the prevailing cue in determining  
855 *Brachypodium distachyon* diurnal gene regulation. *New Phytol.* **227**, 1709–1724 (2020).
- 856 86. Li, M. *et al.* Comprehensive mapping of abiotic stress inputs into the soybean circadian clock. *Proc.*  
857 *Natl. Acad. Sci.* **116**, 23840–23849 (2019).
- 858 87. Bolger, A. M., Lohse, M. & Usadel, B. Trimmomatic: A flexible trimmer for Illumina sequence data.  
859 *Bioinformatics* **30**, (2014).
- 860 88. Kim, D., Paggi, J. M., Park, C., Bennett, C. & Salzberg, S. L. Graph-based genome alignment and  
861 genotyping with HISAT2 and HISAT-genotype. *Nat. Biotechnol.* **37**, (2019).
- 862 89. Pertea, M., Kim, D., Pertea, G. M., Leek, J. T. & Salzberg, S. L. Transcript-level expression analysis of  
863 RNA-seq experiments with HISAT, StringTie and Ballgown. *Nat. Protoc.* **11**, (2016).

- 864 90. Gardiner, L. J. *et al.* Interpreting machine learning models to investigate circadian regulation and  
865 facilitate exploration of clock function. *Proc. Natl. Acad. Sci. U. S. A.* **118**, 2021 (2021).
- 866 91. Zhang, H. *et al.* A Comprehensive Online Database for Exploring ~20,000 Public Arabidopsis RNA-  
867 Seq Libraries. *Mol. Plant* **13**, 1231–1233 (2020).
- 868 92. Eddy, S. R. Accelerated Profile HMM Searches. *PLOS Comput. Biol.* **7**, e1002195 (2011).
- 869 93. Stamatakis, A. RAxML version 8: a tool for phylogenetic analysis and post-analysis of large  
870 phylogenies. *Bioinformatics* **30**, 1312–1313 (2014).
- 871 94. Letunic, I. & Bork, P. Interactive tree of life (iTOL) v3: an online tool for the display and annotation of  
872 phylogenetic and other trees. *Nucleic Acids Res.* **44**, W242–W245 (2016).
- 873 95. Smedley, D. *et al.* BioMart – biological queries made easy. *BMC Genomics* **10**, 1–12 (2009).
- 874 96. Kim, J. A. *et al.* Transcriptome analysis of diurnal gene expression in Chinese cabbage. *Genes (Basel)*  
875 **10**, (2019).
- 876 97. Yang, Y., Li, Y., Sancar, A. & Oztas, O. The circadian clock shapes the Arabidopsis transcriptome by  
877 regulating alternative splicing and alternative polyadenylation. *J. Biol. Chem.* **295**, 7608–7619 (2020).
- 878 98. Wu, G., Anafi, R. C., Hughes, M. E., Kornacker, K. & Hogenesch, J. B. MetaCycle: an integrated R  
879 package to evaluate periodicity in large scale data. *Bioinformatics* **32**, 3351–3353 (2016).
- 880 99. Agostinelli, C. & Lund, U. R package ‘circular’: Circular Statistics. (2017).
- 881 100. Zielinski, T., Moore, A. M., Troup, E., Halliday, K. J. & Millar, A. J. Strengths and Limitations of  
882 Period Estimation Methods for Circadian Data. *PLoS One* **9**, e96462 (2014).
- 883 101. Alexa, A. & Rahnenfuhrer, J. topGO: Enrichment Analysis for Gene Ontology. R package version  
884 2.44.0. *Alexa* (2021).
- 885 102. O’Malley, R. C. *et al.* Cistrome and Epicistrome Features Shape the Regulatory DNA Landscape. *Cell*  
886 **165**, (2016).
- 887 103. Marcussen, T. *et al.* Ancient hybridizations among the ancestral genomes of bread wheat. *Science (80-*  
888 *).* **345**, 6194 (2014).
- 889 104. Zeeman, S. C., Smith, S. M. & Smith, A. M. The diurnal metabolism of leaf starch. *Biochem. J.* **401**,  
890 13–28 (2007).
- 891 105. López-González, C., Juárez-Colunga, S., Morales-Elías, N. C. & Tiessen, A. Exploring regulatory  
892 networks in plants: Transcription factors of starch metabolism. *PeerJ* **2019**, e6841 (2019).
- 893 106. Skryhan, K., Gurrieri, L., Sparla, F., Trost, P. & Blennow, A. Redox regulation of starch metabolism.  
894 *Front. Plant Sci.* **9**, 1344 (2018).

895

896

897

898

899 Acknowledgements

900 H.R., R.R.P. and A.H. were funded by the BBSRC Core Strategic Programme Grant  
901 (Genomes to Food Security) BB/CSP1720/1 and its constituent work package,  
902 BBS/E/T/000PR9819 (WP2 Regulatory interactions and Complex Phenotypes). B.W., R.R.P.  
903 and A.H. was supported by the BBSRC Designing Future Wheat grant BB/P016855/1;  
904 BBS/E/T/000PR9783 (DFW WP4 Data Access and Analysis). C.R. by a BBSRC grant  
905 BB/V509267/1 and Wave 1 of The UKRI Strategic Priorities Fund under the EPSRC Grant  
906 EP/T001569/1, particularly the “AI for Science” theme within that grant & The Alan Turing  
907 Institute. J.C. by the BBSRC funded Norwich Research Park Biosciences Doctoral Training  
908 Partnership grant BB/M011216/1. We would also like to acknowledge BBS/E/T/000PR9816  
909 (NC1 □ Supporting EI’s ISPs and the UK Community with Genomics and Single Cell  
910 Analysis) for data generation and BB/CCG1720/1 for the physical HPC infrastructure and  
911 data centre delivered via the NBI Computing infrastructure for Science (CiS) group. P.B. was  
912 supported by a BBSRC TRDF grant BB/N023145/1. A.N.D., L.L.B.D. and C.A.G. are  
913 funded by BBSRC ISP Genes in the Environment (BB/P013511/1). C.A.G. was also funded  
914 by UK BBSRC SWBIO DTP (BB/M009122/1). We thank Dr. Susan Duncan for her  
915 contribution to preliminary experiments prior to the start of this project.

916

917

918 Author contributions

919 H.R. and A.H. were involved with project concept and designed experiments. H.R. performed  
920 time-course experiments. R.R.P. processed data, quantified read counts and conducted  
921 clustering of rhythmic transcripts. P.B. conducted the phylogenetic analysis of core circadian  
922 protein families. J.C. conducted the cross-correlation analysis. C.R. processed previously  
923 published circadian datasets. H.R., L.L.B.D., C.A.G., B.W., R.R.P. A.H., and A.N.D.  
924 analysed and interpreted the RNA-seq data. H.R. wrote the initial manuscript and all authors  
925 contributed to subsequent drafts.

926

927 Corresponding author

928 Correspondence to Anthony Hall.

929

930 Ethics declarations

931 Competing interests: The authors declare no competing interests.



933 Main Figures and Tables

934 **Fig. 1. Circadian regulation of homoeolog expression of wheat triads.**

935 **a**, Schematic of the origins of hexaploid wheat, showing circadian clocks evolving  
936 independently in the ancestors of the A, B and D subgenomes following divergence from a  
937 common ancestor approximately 6.5 million years ago. Colours of clock icons represent  
938 theoretical differences in clock regulation integrated in the tetraploid and hexaploid hybrids  
939 either through circadian balance or through dominance of a particular homoeolog copy.  
940 Speciation and hybridisation event dates are based on estimates from<sup>103</sup>. **b**, Density plot  
941 showing the distribution of period lengths across rhythmic transcripts (BH  $q < 0.01$ ) in  
942 *Arabidopsis*, *Brassica rapa*, *Brachypodium distachyon*, *Glycine max* (Soybean) and wheat  
943 based on meta2d estimates on 24-68h data following transfer to constant light. **c**, Histogram  
944 showing distribution of period lengths in wheat split between the A, B and D subgenomes.  
945 Dotted line indicates the mean period for the A, B and D subgenomes. **d**, Proportions of  
946 triads with either zero (red segment), one (green segment), two (blue segment) or three  
947 (purple segment) rhythmic gene(s) out of the 16,359 expressed triads in this dataset. Lighter  
948 shading in the outer segments represents cases where one/two homeolog(s) have high  
949 confidence rhythmicity (BH  $q < 0.01$ ) alongside an arrhythmic homeolog (BH  $q > 0.05$ ). We  
950 term these genes “unbalanced rhythmicity” triads. **e**, Of the 3448 triads with three rhythmic  
951 genes, 464 had homoeologs which peaked with an optimum lag of 4, 8 or 12h following  
952 cross-correlation analysis. **f**, 1,139 had homoeologs with period differences of more than 2h.  
953 **g**, 701 had homoeologs with a more than two-fold difference in relative amplitude. **h,i**,  
954 Example triads for unbalanced rhythmicity, where either one or two homoeologs are  
955 rhythmic respectively. **j**, Example triad where the D genome homeolog lags by 8h. **k**,  
956 Example of a triad where the A genome homoeolog has a period estimate 4h longer than the  
957 D genome homoeolog. **l**, Example triad where the relative amplitude of the D-genome  
958 homoeolog is more than four times that of the A-genome homoeolog. **m**, The rhythmicity of  
959 all three homoeologs in **l**, is evident when the expression is mean normalized. **n**, Mean  
960 expression of transcripts across all timepoints in the A, B and D subgenomes within  
961 unbalanced rhythmicity triads compared with circadian balanced and arrhythmic triads. Error  
962 bars represent standard error.

963 Circadian statistics are meta2d estimates from data 0-68h after transfer to L:L. Data represent  
964 the mean of three biological replicates with transcript expression collapsed to gene level.  
965 Genes in example triads are: [Triad 1664: TraesCS3A02G177600, TraesCS3B02G207400,  
966 TraesCS3D02G183200], [Triad 408: TraesCS3A02G533700, TraesCS3B02G610500,  
967 TraesCS3D02G539000], [Triad 13405: TraesCS6A02G269100, TraesCS6B02G296400,  
968 TraesCS6D02G245800], [Triad 10854: TraesCS6A02G166500, TraesCS6B02G194000,  
969 TraesCS6D02G155100] and [Triad 2454: TraesCS2A02G333000, TraesCS2B02G348800,  
970 TraesCS2D02G329900].

971

972

973

974 **Fig. 2. Overlapping GO-slim terms shared between *Arabidopsis* and wheat modules**  
975 **expressed at similar times in the day**

976 **a**, Pearson correlation coefficient ( $r$ ) between eigengenes for wheat and *Arabidopsis*  
977 expression modules ordered by circadian phase. Coloured triangles and axes labels  
978 correspond to module expression profiles and columns in bubble-plot. **b-e**, Expression  
979 profiles of *Arabidopsis* and wheat modules compared in the main text normalised to their  
980 mean. Solid and dashed black lines represent the module eigengene for wheat and  
981 *Arabidopsis* modules respectively. **f**, GO-slim terms associated with *Arabidopsis* and Wheat  
982 modules. Modules are ordered by predicted CT phase for each species. Only terms with -  
983  $\text{Log}_{10}p > 3$  are shown. Wheat W6 and *Arabidopsis* A4 contained no terms above the  
984 significance cut-off and so are not shown. Bubble color indicates the  $-\text{Log}_{10}p$ -value  
985 significance from Fisher's exact test and size indicates the frequency of the GO-slim term in  
986 the underlying EBI Gene Ontology Annotation database (larger bubbles indicate more  
987 general terms).

988

989

990 **Fig. 3. Free-running expression of core circadian clock genes in wheat and their**  
991 **homologs in *Arabidopsis*.** **a-l**, Wheat circadian clock genes were identified through  
992 alignment of phylogenetic protein family trees or BLASTP to known clock gene homologs.  
993 Gene IDs for each gene set are in Supplementary Table 6. Wheat homoeologs are coloured  
994 according to their identity to either the A genome (orange), B genome (yellow) or D genome  
995 (blue) and grey and white blocks indicate subjective dark and light time periods under  
996 constant conditions. Data represent the mean of three biological replicates and transcript  
997 expression is collapsed to gene level. Expression profiles for additional core circadian clock  
998 genes are in Supplementary Fig. 14.  
999 **m**, phases of core clock genes in *Arabidopsis* and wheat (meta2d estimates from data 24-68h  
1000 after transfer to L:L). Genes were not plotted if B.H  $q$ -values were  $> 0.01$ . Wheat values  
1001 represent circular mean circadian phases (CT) across homoeologs calculated in  
1002 Supplementary Table 7.  
1003



1004 **Fig. 4. Similarities and differences in circadian control of transcript accumulation in**  
1005 **key genes involved in primary metabolism and signalling.** Circles represent metabolites  
1006 involved in the breakdown and biosynthesis of starch. Starch synthesis occurs during the day  
1007 and breakdown occurs at night as indicated by the yellow to grey shading gradient. The  
1008 dotted line encloses processes which take place in the chloroplast. Abbreviations: HP:  
1009 Hexose-phosphate, T6P: Trehalose-6-phosphate, TP: Triose phosphate, 3-PGA: Glycerate 3-  
1010 phosphate, Fru6P: Fructose-6-phosphate, Glc6P: Glucose-6-phosphate, Glc1P: Glucose-1-  
1011 phosphate, ATP: Adenosine tri phosphate, ADP-Glc: ADP-glucose, TPS: Trehalose  
1012 phosphate synthase, TPP: Trehalose phosphate phosphatase, PGK1: Phosphoglycerate kinase  
1013 1, PGI1: Glucose-6-phosphate isomerase, PGM1: Phosphoglucomutase-1, PHS1 and 2:  
1014 ALPHA-GLUCAN PHOSPHORYLASE 1 and 2, AGPase: ADP-Glc pyrophosphorylase,  
1015 BAM1,3,5:  $\beta$ -amylase 1,3,5, ISA1,2,3: Isoamylase 1,2,3, DPE1,2: Disproportionating  
1016 enzyme1 and 2, SBEI,II: Starch branching enzyme I, II, PU1: Pullulanase 1, PWD:  
1017 Phosphoglucan, water dikinase, GWD:  $\alpha$ -glucan, water dikinase, SEX4: starch excess 4,  
1018 AMY3:  $\alpha$ -amylase, GBSS: Granule bound Starch synthase, SSI-IV: Starch synthase I-IV.  
1019 Pathway references:<sup>104–106</sup>.  
1020

1021 **Table 1: Numbers of rhythmic genes at (BH  $q < 0.05$  or BH  $q < 0.01$ ) in *Arabidopsis* and**  
 1022 **wheat identified using Metacycle Benjamini Hochberg  $q$ -values.** Periods, relative  
 1023 amplitudes, and  $q$ -values are estimates from meta2d. Data windows reflect hours relative to  
 1024 transfer to constant light from entrained 12:12h light conditions. A repeat of this table with  
 1025 pre-filtering to remove low-expression genes is provided in Supplementary Figure 1, and the  
 1026 effects on proportions of rhythmic genes are discussed in Supplementary Note 1.  
 1027  
 1028

|                                          | Wheat data from this study |                  | <i>Arabidopsis</i> data from Romanowski et al. |
|------------------------------------------|----------------------------|------------------|------------------------------------------------|
|                                          | 24-68 data window          | 0-68 data window | 24-68 data window                              |
| Total number of expressed genes          | 86,567                     | 86,567           | 26,392                                         |
| Total rhythmic genes (BH $q < 0.05$ )    | 28,594                     | 28,530           | 13,392                                         |
| Total rhythmic genes (BH $q < 0.01$ )    | 18,633                     | 21,059           | 10,317                                         |
| Mean Period (h) (BH $q < 0.05$ )         | 26.60h (SD 3.62)           | 26.75h (SD 2.82) | 23.50 (SD 2.52)                                |
| Mean Period (h) (BH $q < 0.01$ )         | 26.82h (SD 3.21)           | 26.83h (SD 2.42) | 23.62 (SD 2.04)                                |
| Mean relative Amplitude (BH $q < 0.05$ ) | 0.24 (SD 0.19)             | 0.26 (SD 0.20)   | 0.28 (SD 0.20)                                 |
| Mean relative Amplitude (BH $q < 0.01$ ) | 0.27 (SD 0.19)             | 0.29 (SD 0.21)   | 0.30 (SD 0.20)                                 |

1029 **Table 2: GO-slim terms for biological processes associated with circadian balanced,**  
 1030 **circadian unbalanced, and arrhythmic wheat triads.** Only enriched terms which were  
 1031 highly enriched (Fisher's exact test  $p < 0.01$ ) in one category and non-significantly expressed  
 1032 ( $p > 0.05$ ) in other categories is displayed.  
 1033

|                         | GO ID                            | Terms                                          | <i>p</i> -value<br>in<br>circadian<br>balanced<br>triads | <i>p</i> -value in<br>circadian<br>unbalanced<br>triads | <i>p</i> -value<br>in non-<br>rhythmic<br>triads |
|-------------------------|----------------------------------|------------------------------------------------|----------------------------------------------------------|---------------------------------------------------------|--------------------------------------------------|
| CIRCADIAN<br>BALANCED   | GO:0009628                       | response to abiotic stimulus                   | 0.00                                                     | 0.22                                                    | 0.58                                             |
|                         | GO:0015979                       | photosynthesis                                 | 0.00                                                     | 1.00                                                    | 1.00                                             |
|                         | GO:0006091                       | generation of precursor metabolites and energy | 0.00                                                     | 1.00                                                    | 1.00                                             |
|                         | GO:0006518                       | peptide metabolic process                      | 0.00                                                     | 1.00                                                    | 0.92                                             |
|                         | GO:1901566                       | organonitrogen compound biosynthetic process   | 0.00                                                     | 1.00                                                    | 0.92                                             |
|                         | GO:0009059                       | macromolecule biosynthetic process             | 0.00                                                     | 1.00                                                    | 0.99                                             |
|                         | GO:0006412                       | translation                                    | 0.00                                                     | 1.00                                                    | 0.98                                             |
|                         | GO:0034645                       | cellular macromolecule biosynthetic process    | 0.00                                                     | 1.00                                                    | 1.00                                             |
|                         | GO:0010467                       | gene expression                                | 0.00                                                     | 1.00                                                    | 0.90                                             |
|                         | GO:0019725                       | cellular homeostasis                           | 0.00                                                     | 0.54                                                    | 0.96                                             |
| GO:0065008              | regulation of biological quality | 0.00                                           | 0.71                                                     | 1.00                                                    |                                                  |
| CIRCADIAN<br>UNBALANCED | GO:0003006                       | developmental process involved in reproduction | 0.85                                                     | 0.00                                                    | 0.87                                             |
|                         | GO:0090567                       | reproductive shoot system development          | 0.92                                                     | 0.01                                                    | 1.00                                             |
|                         | GO:0009719                       | response to endogenous stimulus                | 0.97                                                     | 0.01                                                    | 0.10                                             |
|                         | GO:0048731                       | system development                             | 0.98                                                     | 0.00                                                    | 0.97                                             |
|                         | GO:0048608                       | reproductive structure development             | 0.98                                                     | 0.00                                                    | 0.97                                             |
|                         | GO:0043412                       | macromolecule modification                     | 1.00                                                     | 0.00                                                    | 0.28                                             |
|                         | GO:0022414                       | reproductive process                           | 1.00                                                     | 0.00                                                    | 0.47                                             |
| NON-<br>RHYTHMIC        | GO:0044237                       | cellular metabolic process                     | 0.08                                                     | 1.00                                                    | 0.00                                             |
|                         | GO:0009605                       | response to external stimulus                  | 0.41                                                     | 0.39                                                    | 0.00                                             |
|                         | GO:0009607                       | response to biotic stimulus                    | 0.58                                                     | 0.60                                                    | 0.01                                             |
|                         | GO:0060255                       | regulation of macromolecule metabolic process  | 0.60                                                     | 0.76                                                    | 0.00                                             |
|                         | GO:0009056                       | catabolic process                              | 0.65                                                     | 0.93                                                    | 0.00                                             |
|                         | GO:0048869                       | cellular developmental process                 | 0.71                                                     | 0.19                                                    | 0.00                                             |
|                         | GO:0019222                       | regulation of metabolic process                | 0.78                                                     | 0.85                                                    | 0.00                                             |
|                         | GO:0044238                       | primary metabolic process                      | 0.81                                                     | 0.24                                                    | 0.00                                             |
|                         | GO:0071704                       | organic substance metabolic process            | 0.81                                                     | 0.26                                                    | 0.00                                             |
|                         | GO:0008219                       | cell death                                     | 0.82                                                     | 0.94                                                    | 0.00                                             |
| GO:0010468              | regulation of gene expression    | 0.88                                           | 0.15                                                     | 0.00                                                    |                                                  |

|  |            |                                     |      |      |      |
|--|------------|-------------------------------------|------|------|------|
|  | GO:0009790 | embryo development                  | 0.95 | 0.98 | 0.00 |
|  | GO:0007049 | cell cycle                          | 0.97 | 1.00 | 0.00 |
|  | GO:0065009 | regulation of molecular function    | 1.00 | 1.00 | 0.00 |
|  | GO:0006807 | nitrogen compound metabolic process | 1.00 | 1.00 | 0.00 |

1034

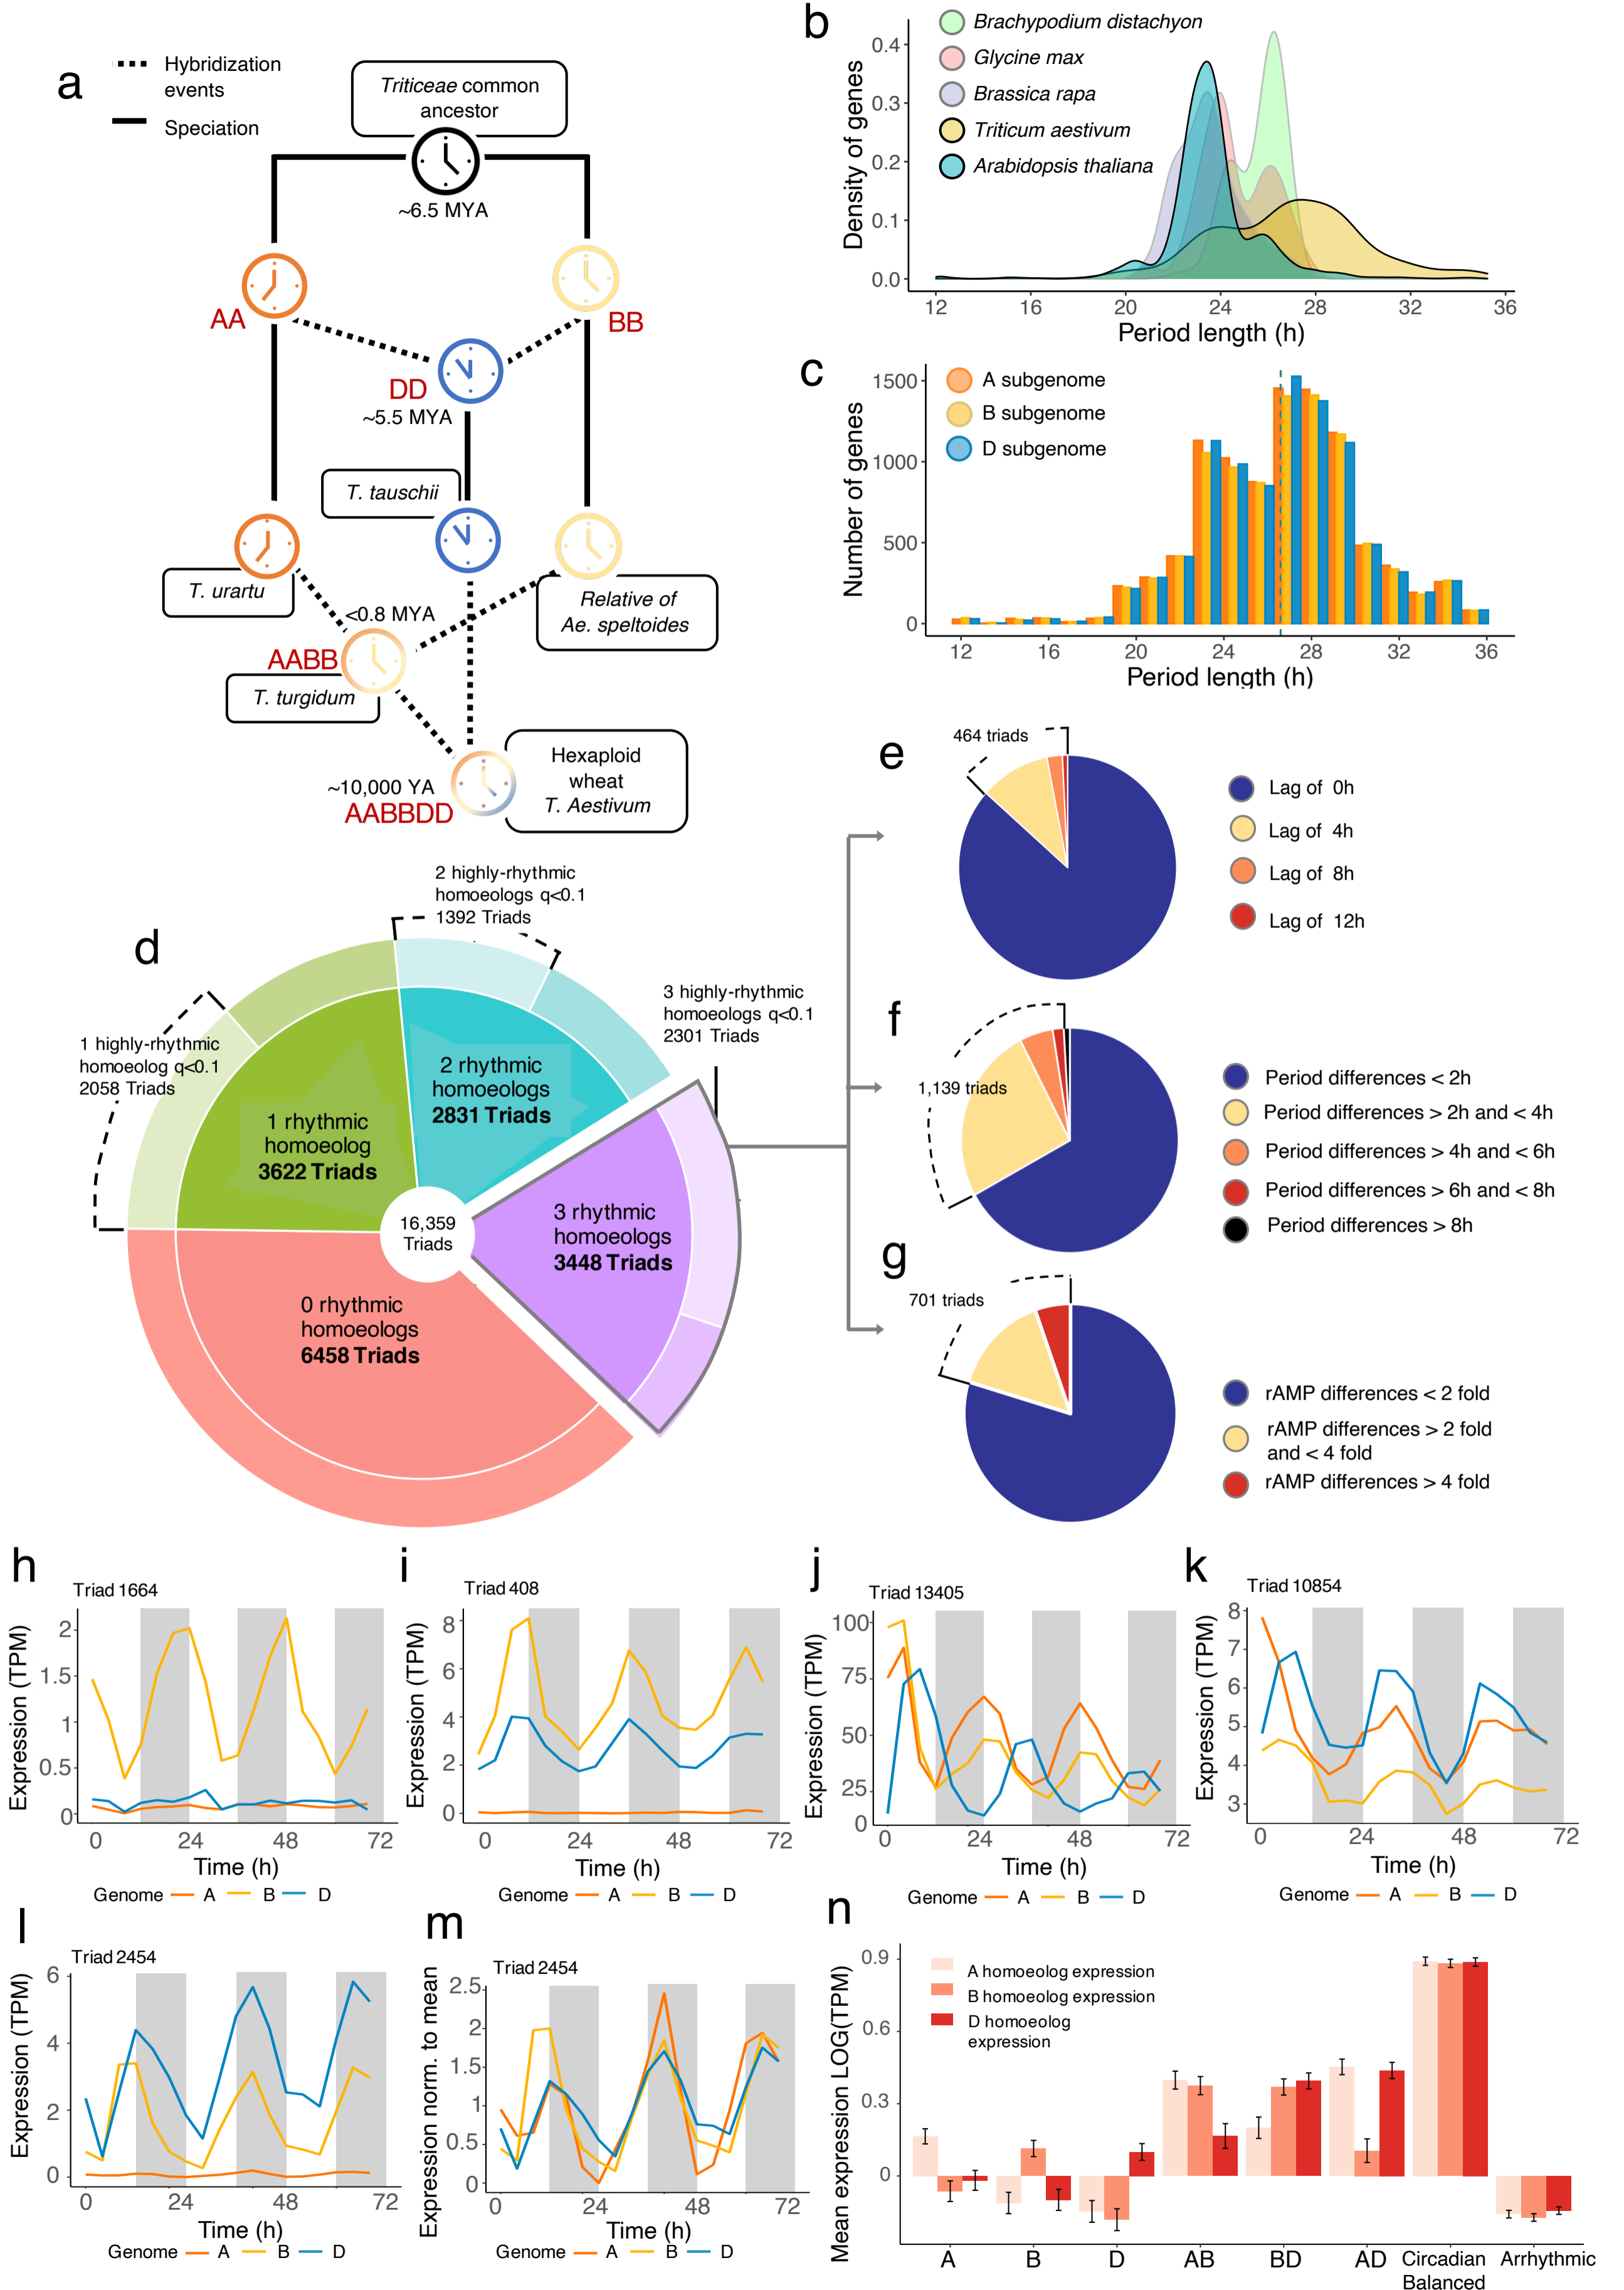

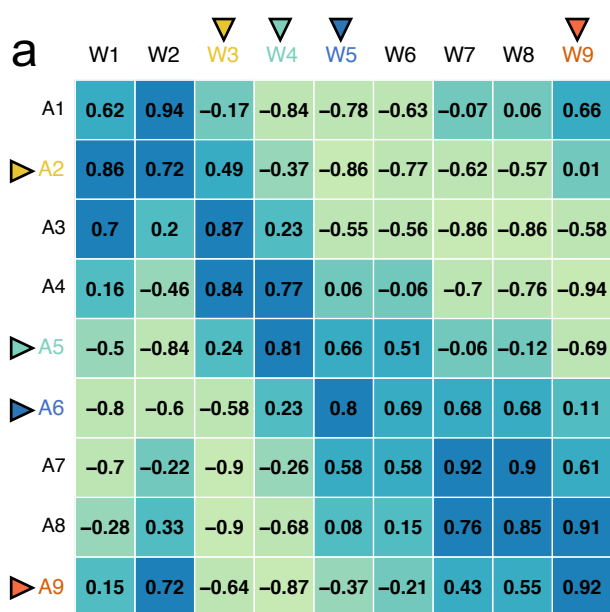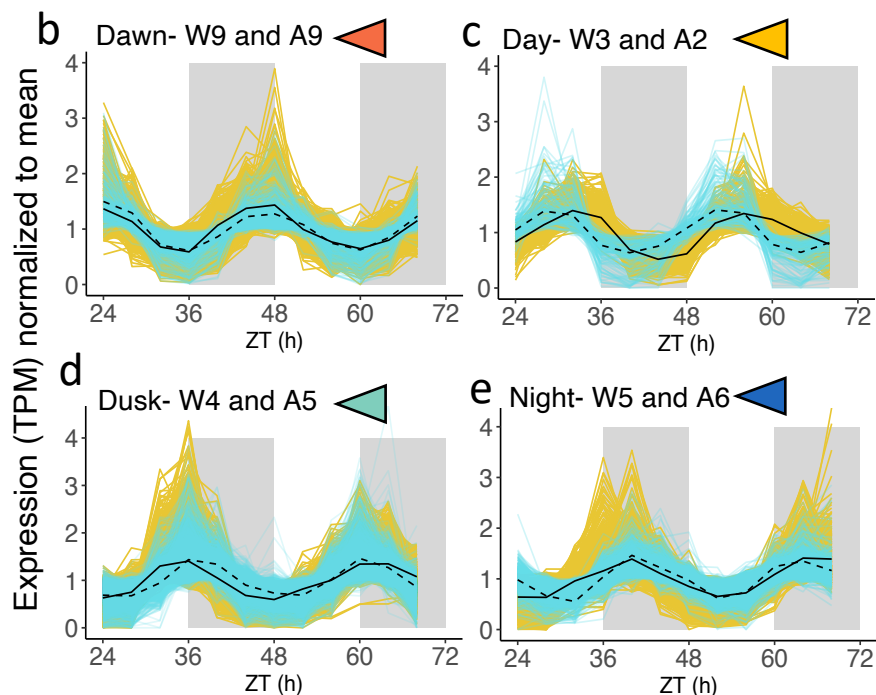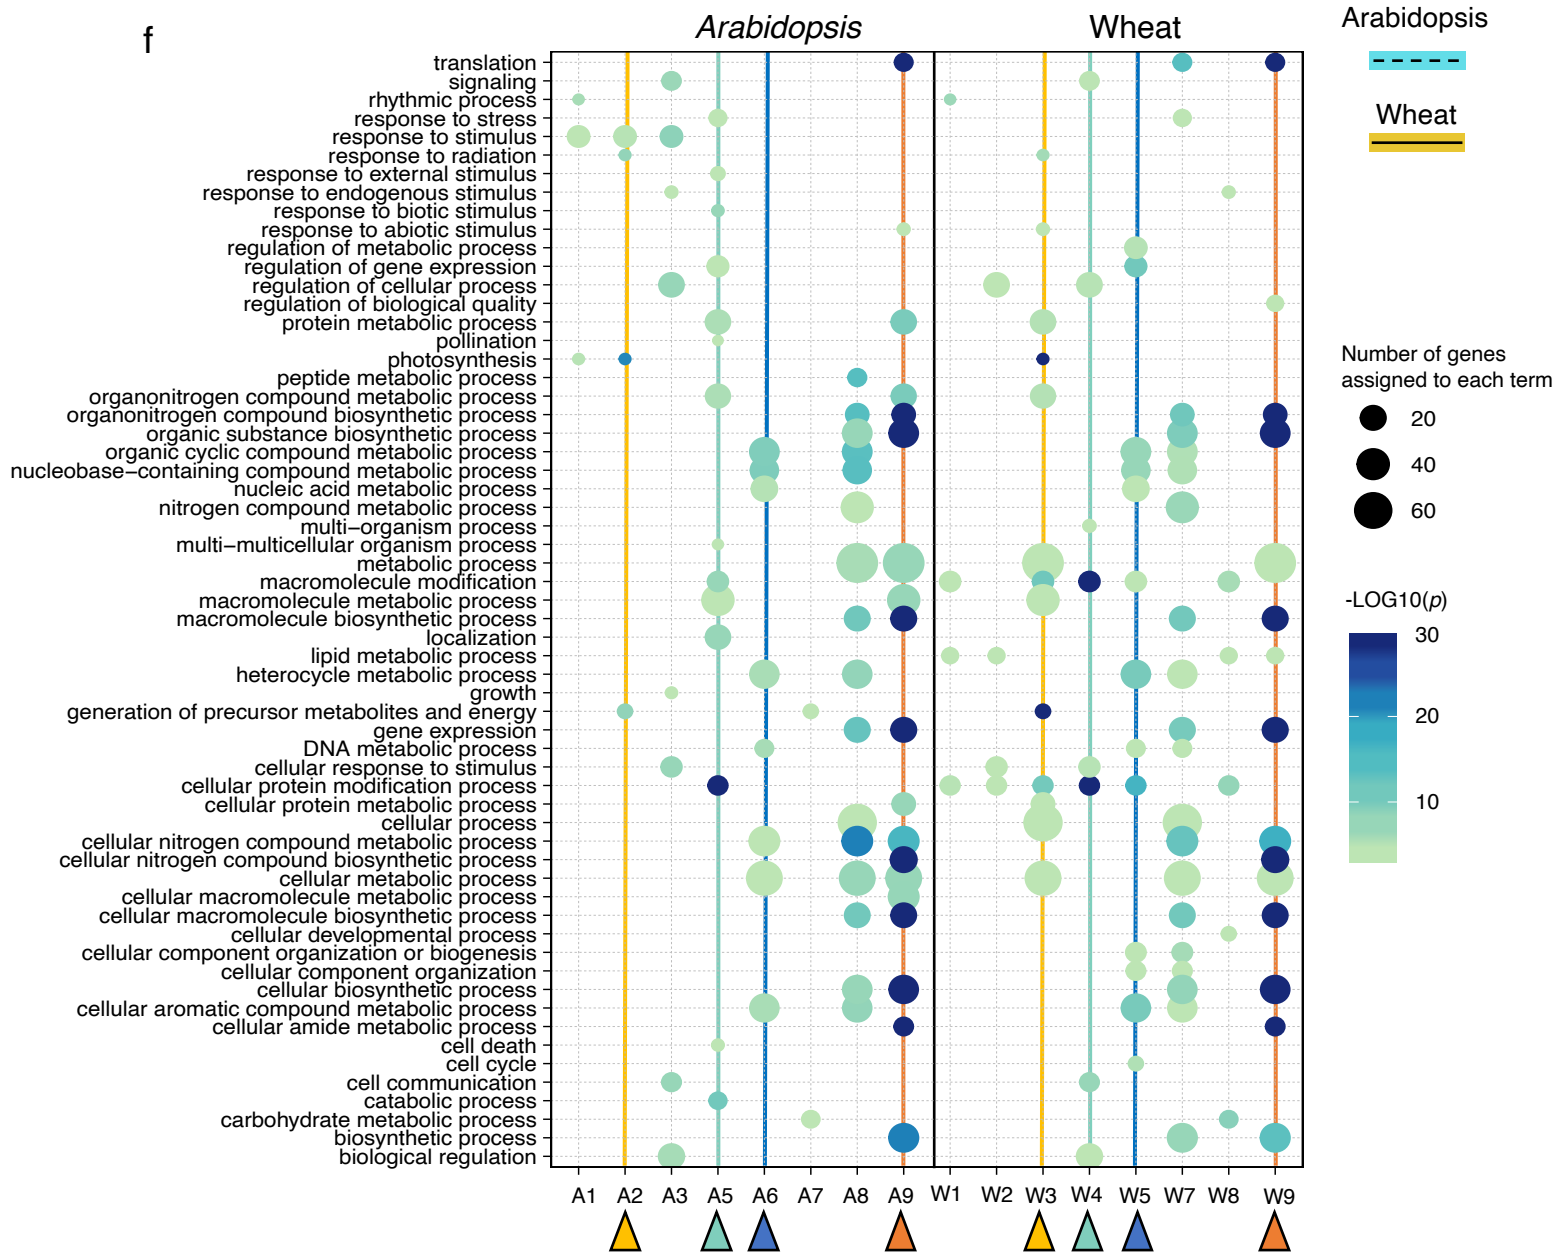

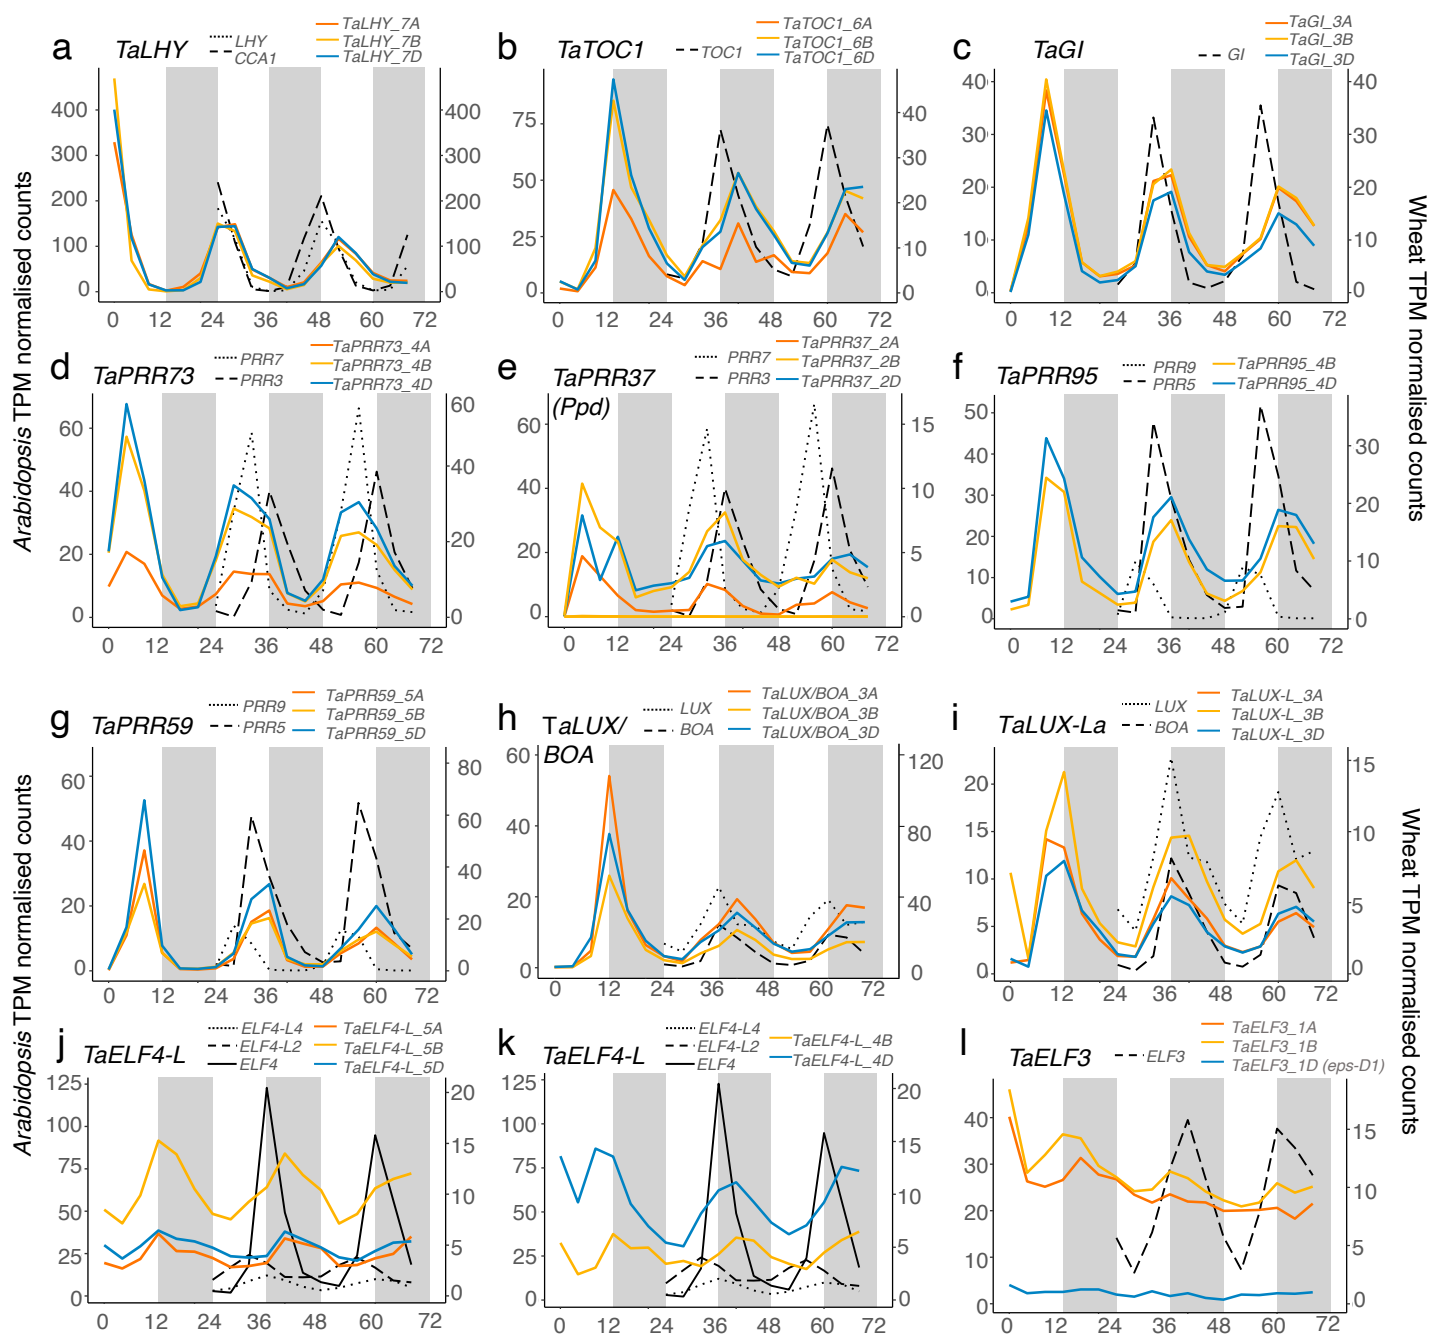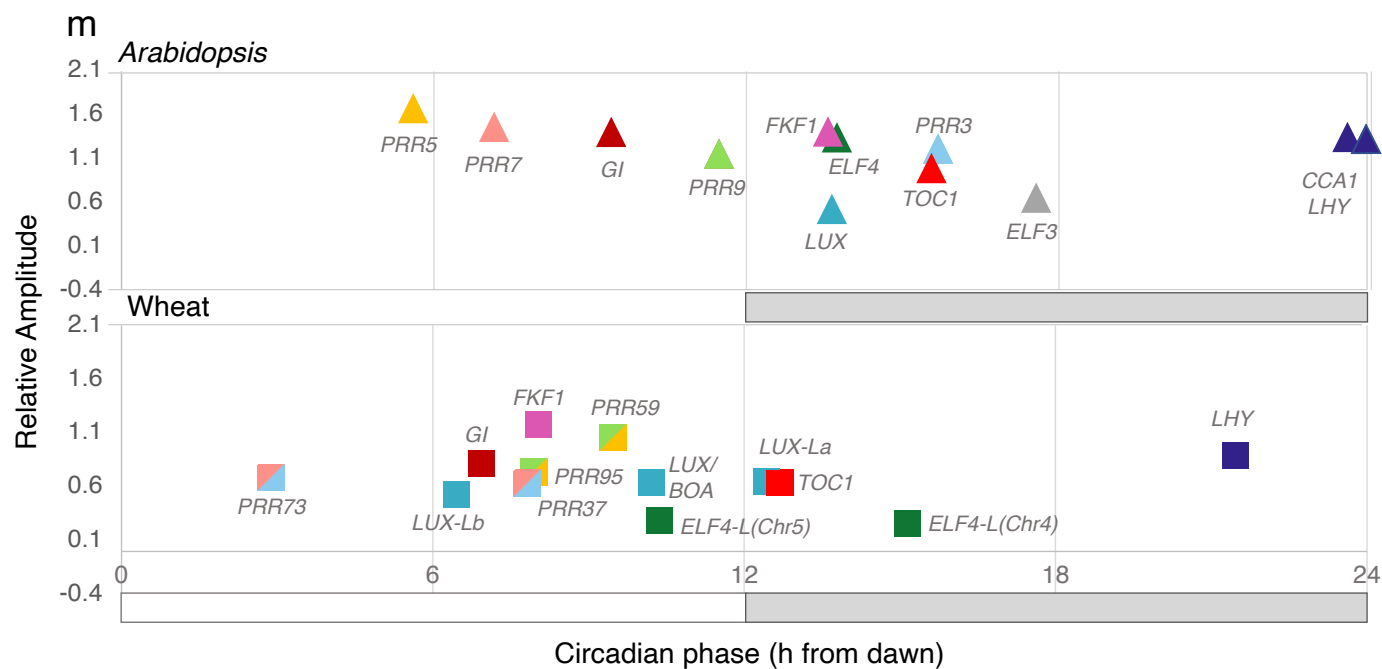

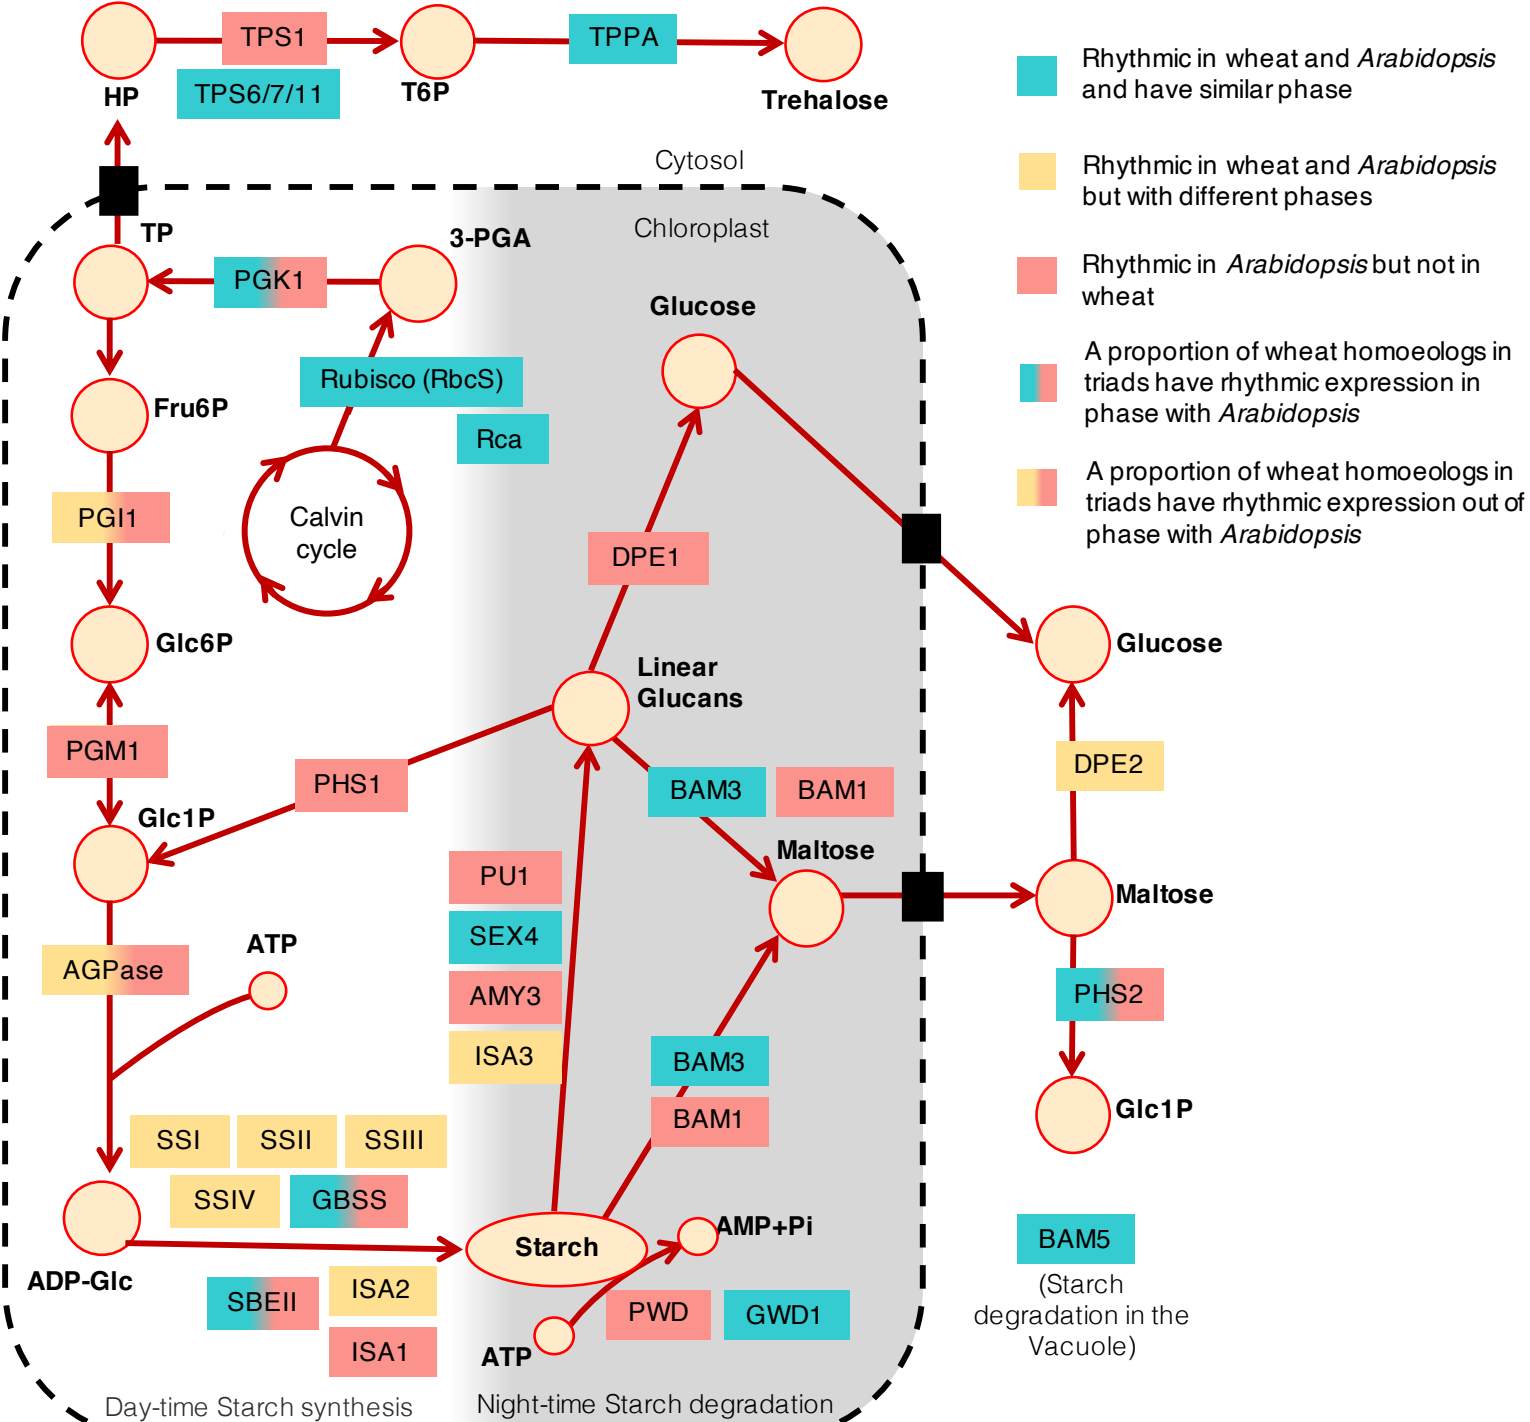

Source: https://biorxiv.org/content/10.1101/2021.09.30.462369v1.full.pdf
